# Supplementary material
Source: publisher figshare collection journal article supplement (https://gsapubs.figshare.com/ndownloader/files/23307617)
Supplement: Supplementary file 1 [file 23307617]

## Sheet: Table DR1. U-Pb data
Sauer, K.B., Gordon, S.M., Miller, R.B., Vervoort, J.D., and Fisher, C.M., 2018, Provenance and metamorphism of the Swakane Gneiss: Implications for incorporation of sediment into the deep levels of the North Cascades continental magmatic arc, Washington: Lithosphere, https://doi.org/10.1130/L712.1.
GSA DATA REPOSITORY ITEM 2018144
DATA REPOSITORY TABLE DR1. ZIRCON U-Pb GEOCHRONOLOGY DATA
Analysis	U	206Pb	U/Th	207Pb*	±	207Pb*	±	206Pb*	±	error	206Pb*	±	207Pb*	±	207Pb*	±	CONC.	Best age*	±
	(ppm)	204Pb		206Pb*	(abs)	235U*	(abs)	238U	(abs)	corr.	238U*	(Ma)	235U	(Ma)	206Pb*	(Ma)	%	(Ma)	(Ma)
SK14-19: Estes Butte
SK14_19_1	355	43941.2	2.69552	0.1025	0.00207639	3.864	0.0865633	0.2726	0.00627171	0.95385	1553.99	34.9563	1606.19	33.1541	1669.88	33.9148	96.7495	1669.88	33.9148
SK14_19_2	317.3	2556.36	1.7667	0.0464	0.00151696	0.0738	0.00240595	0.01146	0.00025423	0.14987	73.5568	1.6295	72.2991	2.30885	18.4553	39.1269	101.6	73.5568	1.6295
SK14_19_3	91.5	683.333	2.97078	0.0518	0.00252256	0.1875	0.00956569	0.02611	0.000607283	0.29148	165.646	3.86638	174.494	8.37065	276.591	106.525	95.2217	165.646	3.86638
SK14_19_4	24.13	-51.4625	4.18198	0.0488	0.0034413	0.1497	0.0102471	0.02206	0.000651964	-0.016778	140.671	4.11238	141.647	9.06886	138.233	103.712	99.3046	140.671	4.11238
SK14_19_5	107.6	964	2.90811	0.0496	0.00171583	0.1582	0.00541949	0.02324	0.000527768	0.17866	147.988	3.36398	149.126	4.83121	176.291	66.715	99.312	147.988	3.36398
SK14_19_6	110.2	679	3.76109	0.0494	0.00196625	0.1626	0.00700111	0.02415	0.000553343	0.1542	153.777	3.51345	152.976	6.20886	166.86	80.3705	100.558	153.777	3.51345
SK14_19_7	101	224.872	1.78666	0.0479	0.00161486	0.0755	0.00258652	0.01144	0.000279194	0.26653	73.2889	1.76848	73.9053	2.48704	94.3329	55.4648	99.2193	73.2889	1.76848
SK14_19_8	194.1	1850	1.65756	0.0491	0.00147456	0.1383	0.00422975	0.0204	0.000458873	0.52289	130.106	2.90837	131.529	3.91581	152.609	50.6248	98.9773	130.106	2.90837
SK14_19_9	180.7	788.5	2.44851	0.049	0.00147323	0.0799	0.00256	0.01181	0.000260558	0.35342	75.544	1.65225	78.0509	2.4581	147.831	49.0333	96.9702	75.544	1.65225
SK14_19_10	273.8	557.25	2.10615	0.0473	0.00160777	0.073	0.00247621	0.01126	0.000235828	0.25385	72.1952	1.51243	71.5423	2.37729	64.4002	52.2827	100.893	72.1952	1.51243
SK14_19_11	593	-838.889	3.30362	0.04802	0.0011018	0.118	0.0029681	0.01778	0.000407985	0.54255	113.65	2.61877	113.257	2.83263	100.255	26.1432	100.312	113.65	2.61877
SK14_19_12	632	-4233.33	2.07213	0.04844	0.00109484	0.0933	0.00239415	0.01408	0.000328935	0.7511	90.0608	2.10966	90.5728	2.28915	120.814	25.2853	99.5138	90.0608	2.10966
SK14_19_13	341.3	41888.2	3.93203	0.10509	0.00212037	4.216	0.0905476	0.2923	0.00628217	0.9176	1645.1	35.0024	1677.14	34.1294	1715.89	34.6801	98.5614	1715.89	34.6801
SK14_19_14	316	431.667	1.98243	0.0478	0.00145737	0.0754	0.00212699	0.0115	0.000254951	0.17048	73.6812	1.63559	73.8109	2.03465	89.3818	47.6391	99.8643	73.6812	1.63559
SK14_19_15	57.39	425.667	2.52486	0.0498	0.00241496	0.2138	0.0106922	0.03124	0.000726137	0.29407	198.373	4.58634	196.736	9.1003	185.669	92.4426	100.797	198.373	4.58634
SK14_19_17	120.7	34033.3	2.414	0.0497	0.00223339	0.0805	0.0036718	0.01182	0.000265113	0.12677	75.5402	1.69933	78.6149	3.47646	180.987	90.0491	96.3555	75.5402	1.69933
SK14_19_18	291	-2153.64	1.73939	0.0474	0.00145214	0.0744	0.00241333	0.01152	0.000305097	0.46631	73.8465	1.90243	72.8663	2.31726	69.4269	48.8063	101.334	73.8465	1.90243
SK14_19_19	92.8	330.8	2.24155	0.0504	0.00288202	0.0858	0.0056661	0.01242	0.00033853	0.4546	79.288	2.17877	83.5833	5.27678	213.483	122.065	95.2	79.288	2.17877
SK14_19_20	193.6	1172.5	3.6391	0.0479	0.0016964	0.0888	0.00290589	0.01356	0.000292659	-0.12779	86.8093	1.87199	86.3849	2.79901	94.3329	60.0597	100.511	86.8093	1.87199
SK14_19_23	205.2	915.238	3.69065	0.048	0.00153675	0.0875	0.00305164	0.01339	0.000302187	-0.051212	85.7149	1.93597	85.1718	2.8615	99.2691	55.1852	100.673	85.7149	1.93597
SK14_19_24	725	-58850	5.9329	0.08797	0.00177569	2.838	0.0608744	0.2334	0.00500302	0.92438	1349.92	28.5824	1365.64	27.9221	1381.83	28.1216	99.0227	1381.83	28.1216
SK14_19_26	194	405.75	1.552	0.048	0.0017809	0.0811	0.00314974	0.0122	0.000271912	0.065217	78.1281	1.73736	79.1786	3.19782	99.2691	66.8641	98.7267	78.1281	1.73736
SK14_19_27	56.06	517.083	3.27836	0.0504	0.00197638	0.2243	0.00789773	0.0325	0.000802122	0.20238	206.134	5.03996	205.482	6.78768	213.483	78.9885	100.338	206.134	5.03996
SK14_19_28	192	1196.43	2.71955	0.0473	0.00185874	0.0857	0.00371857	0.01302	0.000328342	0.32082	83.4309	2.11555	83.4898	3.43622	64.4002	63.5062	99.8812	83.4309	2.11555
SK14_19_29	1746	1762.22	25.1948	0.04752	0.00101988	0.08794	0.00199424	0.01346	0.000294735	0.78042	86.2136	1.88445	85.5826	1.92463	75.4389	18.1681	100.71	86.2136	1.88445
SK14_19_30	58.84	371.316	2.51453	0.0473	0.0033369	0.1179	0.00814863	0.01797	0.000432167	0.046529	114.962	2.74643	113.166	7.36662	64.4002	104.658	101.455	114.962	2.74643
SK14_19_31	42.54	390.5	3.1699	0.0496	0.00306497	0.1142	0.00679534	0.01673	0.000389817	-0.062745	106.76	2.4983	109.8	6.30048	176.291	117.58	97.41	106.76	2.4983
SK14_19_32	1004	21800	0.698192	0.06085	0.00123174	0.8196	0.0179036	0.0978	0.0021968	0.91236	600.812	13.3827	607.825	12.8925	633.936	14.4354	98.9599	600.812	13.3827
SK14_19_33	120.6	-133.714	3.90165	0.0468	0.00194064	0.0743	0.00273828	0.01164	0.00027694	0.12035	74.6697	1.77043	72.7718	2.63715	39.0335	92.7077	102.516	74.6697	1.77043
SK14_19_34	284	1096.15	4.58805	0.0477	0.00145606	0.0995	0.00275138	0.01518	0.000338634	0.0054847	97.153	2.15433	96.3147	2.63659	84.4158	47.5745	100.837	97.153	2.15433
SK14_19_35	71.3	309.8	3.72713	0.0514	0.00207287	0.236	0.00877715	0.03307	0.000767822	0.29143	209.446	4.82629	215.14	7.46577	258.809	81.2995	97.4872	209.446	4.82629
SK14_19_36	118.4	737.647	4.25899	0.0503	0.00164379	0.2263	0.00800279	0.03248	0.000715528	0.37785	206.035	4.53778	207.14	6.88866	208.88	57.4916	99.4745	206.035	4.53778
SK14_19_37	341.7	33880	3.80936	0.08765	0.0017802	2.728	0.0600149	0.2267	0.00495552	0.85824	1312.75	28.0834	1336.11	27.5739	1374.82	28.3249	98.5829	1374.82	28.3249
SK14_19_38	115.7	9233.33	1.38563	0.09901	0.00208415	3.474	0.0979207	0.2549	0.00641869	0.90671	1449.75	35.1136	1521.33	34.3786	1605.55	34.2815	96.2116	1605.55	34.2815
SK14_19_40	205.5	509.667	1.28759	0.0474	0.00169077	0.0762	0.0033649	0.01156	0.000281164	0.49698	74.1019	1.78787	74.566	3.25981	69.4269	52.0887	99.3658	74.1019	1.78787
SK14_19_41	210	364.833	2.08127	0.0498	0.00171814	0.1089	0.00354735	0.01602	0.000362707	0.11866	102.227	2.32028	104.959	3.26368	185.669	64.7317	97.6128	102.227	2.32028
SK14_19_42	140.8	419	1.7129	0.0485	0.0023132	0.0915	0.00495065	0.01366	0.000338583	0.55825	87.3798	2.17791	88.8997	4.8012	123.73	90.5679	98.3828	87.3798	2.17791
SK14_19_43	417.9	-3065	2.08221	0.04818	0.00124604	0.0755	0.00220002	0.01138	0.000252788	0.58417	72.88	1.60387	73.9053	2.10597	108.117	38.4576	98.7018	72.88	1.60387
SK14_19_44	153.5	-222.2	2.33994	0.0479	0.00203906	0.0742	0.0034369	0.01114	0.000268589	0.21068	71.3741	1.70907	72.6773	3.33646	94.3329	78.6334	98.2646	71.3741	1.70907
SK14_19_45	213	-569.667	1.96133	0.0478	0.00195037	0.0813	0.00341231	0.01227	0.000292952	0.30051	78.5945	1.85757	79.3664	3.21761	89.3818	72.1043	99.0547	78.5945	1.85757
SK14_19_46	122.9	102.333	1.50428	0.0475	0.00221416	0.0779	0.00355912	0.01168	0.000294905	-0.055497	74.8586	1.85747	76.1687	3.36703	74.4384	79.9662	98.279	74.8586	1.85747
SK14_19_47	279	-39500	3.96871	0.08848	0.00179008	2.944	0.0647754	0.2415	0.00519027	0.86297	1394.62	29.5317	1393.3	28.7076	1392.93	28.4766	100.085	1392.93	28.4766
SK14_19_48	427.7	-643.2	2.54887	0.0486	0.00146792	0.0784	0.00254138	0.01168	0.000258203	0.43947	74.7538	1.64625	76.6396	2.44196	128.579	55.6316	97.6751	74.7538	1.64625
SK14_19_50	412.6	53133.3	2.65167	0.1077	0.00219267	4.419	0.101055	0.2972	0.00679861	0.94448	1666.46	36.9274	1715.91	35.4018	1760.86	35.8869	97.7564	1760.86	35.8869
SK14_19_51	792	745.7	0.810645	0.04801	0.00114843	0.097	0.00251468	0.01455	0.000322926	0.62317	93.1036	2.07679	94.0033	2.40516	99.7619	33.3138	99.0598	93.1036	2.07679
SK14_19_52	729	7600	2.88142	0.04882	0.00130777	0.108	0.00274874	0.01604	0.000378038	0.3856	102.482	2.42634	104.134	2.62664	139.195	41.7499	98.5075	102.482	2.42634
SK14_19_53	268.8	248.5	1.82609	0.0471	0.00152557	0.0763	0.00292894	0.01144	0.000268234	0.48622	73.3636	1.72158	74.6603	2.74376	54.3003	46.3015	98.2159	73.3636	1.72158
SK14_19_55	292.7	860	2.24808	0.049	0.00154932	0.0903	0.0031657	0.01321	0.000299001	0.51444	84.46	1.9133	87.7828	2.97323	147.831	57.5658	96.3737	84.46	1.9133
SK14_19_57	507	541.429	694.521	0.0511	0.00150149	0.0826	0.0031653	0.01164	0.000294272	0.76631	74.2613	1.906	80.5864	2.97415	245.343	52.3659	92.575	74.2613	1.906
SK14_19_58	268	-1826.36	2.78876	0.0496	0.00155694	0.0811	0.00265347	0.01168	0.000262619	0.33645	74.6585	1.67902	79.1786	2.55258	176.291	53.7696	94.543	74.6585	1.67902
SK14_19_59	724	1780.65	25.4035	0.04808	0.00107925	0.0793	0.00205071	0.01187	0.000261646	0.79745	76.0154	1.66525	77.4866	1.95989	103.207	24.3717	98.1697	76.0154	1.66525
SK14_19_60	240	301.5	2.96663	0.0479	0.00138483	0.0785	0.00231407	0.01171	0.000258746	0.42231	75.0119	1.65532	76.7337	2.21754	94.3329	44.775	97.8044	75.0119	1.65532
SK14_19_61	1117	6891.67	1.88364	0.048	0.00110145	0.0778	0.00202759	0.01164	0.000327255	0.63475	74.5557	2.04477	76.0745	1.93751	99.2691	26.5461	98.0657	74.5557	2.04477
SK14_19_62	79.7	156.667	3.81522	0.0486	0.00258936	0.1256	0.00632061	0.01848	0.000411101	0.12433	118.01	2.60398	120.136	5.73363	128.579	98.94	98.257	118.01	2.60398
SK14_19_63	190.9	-171	2.24061	0.049	0.00196224	0.0763	0.00327699	0.0112	0.000275274	0.45207	71.6566	1.74639	74.6603	3.08414	147.831	92.0054	96.1669	71.6566	1.74639
SK14_19_64	226	-3592.31	3.62761	0.04928	0.0012569	0.223	0.00605818	0.03263	0.000840706	0.63312	207.245	5.30056	204.404	5.31828	161.174	37.8807	101.264	207.245	5.30056
SK14_19_65	82.5	-589	2.0625	0.0505	0.00215177	0.1564	0.00676642	0.02241	0.000550712	0.25328	142.578	3.48043	147.547	6.07076	218.073	83.2862	96.8296	142.578	3.48043
SK14_19_66	476.1	42176.5	6.33112	0.08797	0.00180654	2.859	0.0636675	0.2355	0.00524157	0.87902	1361.75	29.757	1371.18	28.3789	1381.83	29.0654	99.4223	1381.83	29.0654
SK14_19_67	84	-159.8	2.5	0.048	0.00324524	0.0991	0.00660442	0.01497	0.000330515	0.01154	95.779	2.12509	95.9452	6.11179	99.2691	99.289	99.8357	95.779	2.12509
SK14_19_68	136.9	678.125	2.00146	0.0495	0.00171467	0.0859	0.00279133	0.01253	0.000297322	0.11831	80.0793	1.88669	83.6768	2.6074	171.582	72.5023	95.9306	80.0793	1.88669
SK14_19_69	108	4637.84	2.04545	0.09043	0.00192526	3.128	0.0726826	0.2493	0.00553355	0.81861	1434.89	31.1052	1439.6	30.1667	1434.63	31.4913	99.6709	1434.63	31.4913
SK14_19_70	62.9	-434	3.43716	0.053	0.00217568	0.2413	0.0100364	0.03269	0.000782531	0.12113	206.643	4.93126	219.484	8.43781	328.797	82.2187	94.4769	206.643	4.93126
SK14_19_71	355	1068.33	2.27564	0.0479	0.0015355	0.0748	0.00257837	0.0113	0.000255883	0.28419	72.3954	1.64917	73.2442	2.48007	94.3329	55.0599	98.8965	72.3954	1.64917
SK14_19_73	294	1287	3.87352	0.0466	0.00151942	0.0877	0.00273615	0.01361	0.00030165	0.29656	87.2721	1.93328	85.3586	2.62879	28.7764	40.4467	102.092	87.2721	1.93328
SK14_19_74	353	12725	2.77516	0.088	0.00179644	2.716	0.0625433	0.2236	0.00522387	0.93271	1294.7	29.4041	1332.84	27.9795	1382.48	28.6208	97.6013	1382.48	28.6208
SK14_19_76	131.5	21625	1.83403	0.10607	0.00220462	4.385	0.10352	0.3012	0.00728688	0.90273	1692.52	39.2904	1709.52	35.6236	1732.94	36.0724	99.2828	1732.94	36.0724
SK14_19_77	240	47090.9	1.61399	0.10643	0.00218427	4.852	0.114091	0.3311	0.00763485	0.95691	1860.06	41.8527	1793.96	37.5275	1739.15	35.783	102.773	1739.15	35.783
SK14_19_80	207.1	231.571	1.36519	0.0479	0.00177982	0.0783	0.00303519	0.01187	0.000280818	0.29215	76.0328	1.78232	76.5454	2.8479	94.3329	66.8458	99.3768	76.0328	1.78232
SK14_19_81	568	2252.17	4.51152	0.04855	0.00116848	0.0931	0.00280661	0.01386	0.000386962	0.74092	88.6476	2.4556	90.3871	2.62238	126.156	31.3883	98.1709	88.6476	2.4556
SK14_19_82	203.9	22352.9	1.19449	0.10577	0.00216067	4.07	0.0982393	0.2801	0.00655305	0.93885	1575.82	35.7273	1648.31	34.7537	1727.74	35.2161	96.5755	1727.74	35.2161
SK14_19_83	249	682.143	1.50909	0.0477	0.00186283	0.0747	0.00282702	0.01145	0.000279358	0.28167	73.3714	1.77555	73.1498	2.72454	84.4158	64.2516	100.331	73.3714	1.77555
SK14_19_84	182.1	-6994.87	0.858557	0.08871	0.00181237	2.744	0.0607274	0.2258	0.00489941	0.85036	1305.86	27.9495	1340.46	27.7596	1397.91	29.0805	97.9102	1397.91	29.0805
SK14_19_85	219.5	-954.5	1.57914	0.0488	0.00204758	0.0866	0.0041761	0.0131	0.000297059	0.45512	83.7811	1.89221	84.3312	3.88636	138.233	93.7194	99.4883	83.7811	1.89221
SK14_19_86	210.1	229.778	1.94717	0.0489	0.0016268	0.0995	0.00360001	0.01484	0.00033718	0.5066	94.8426	2.14353	96.3147	3.31705	143.039	61.2213	98.5954	94.8426	2.14353
SK14_19_87	1128	1521.43	2.33058	0.04767	0.00112649	0.0928	0.00287832	0.01417	0.000364987	0.87467	90.7226	2.35443	90.1084	2.76742	82.923	29.0205	100.662	90.7226	2.35443
SK14_19_88	276.3	2127	2.3199	0.0487	0.00170548	0.0783	0.00278251	0.01162	0.000261553	0.048862	74.3618	1.66497	76.5454	2.59757	133.413	62.2497	97.2958	74.3618	1.66497
SK14_19_89	220.1	831.5	1.94779	0.0469	0.00144563	0.0737	0.00240472	0.01146	0.000273921	0.4887	73.5101	1.75645	72.2045	2.30777	44.1381	41.6491	101.733	73.5101	1.75645
SK14_19_90	537	69142.9	28.3977	0.10126	0.00208843	3.785	0.108694	0.2734	0.00714556	0.98522	1548.15	38.4842	1589.57	36.0541	1647.34	34.2617	98.0164	1647.34	34.2617
SK14_19_91	487	1838.33	4.04485	0.04898	0.00125846	0.0923	0.00257832	0.01367	0.000316777	0.5772	87.39	2.01303	89.6437	2.46997	146.874	37.5931	97.6372	87.39	2.01303
SK14_19_92	132.3	565	2.08675	0.0474	0.00230406	0.0845	0.00415886	0.013	0.000322025	0.080551	83.2927	2.05384	82.3669	3.95769	69.4269	83.1412	101.088	83.2927	2.05384
SK14_19_93	530	982.5	1.10647	0.04842	0.00130181	0.0752	0.00234564	0.0113	0.000288922	0.68442	72.3475	1.81711	73.6221	2.2494	119.841	40.3302	98.389	72.3475	1.81711
SK14_19_94	751.2	1057.5	13.5596	0.04819	0.00111974	0.1139	0.00278375	0.01713	0.000412644	0.69365	109.494	2.65431	109.527	2.59988	108.607	30.9548	99.9683	109.494	2.65431
SK14_19_95	464.9	928.947	1.22342	0.04831	0.00133414	0.0775	0.00230054	0.01158	0.000281493	0.42553	74.1436	1.78813	75.7918	2.20391	114.478	42.8659	97.9269	74.1436	1.78813
SK14_19_96	122.3	22927.3	1.93819	0.10895	0.00222911	4.74	0.116086	0.3143	0.00745076	0.95116	1758.92	40.449	1774.34	37.4616	1781.93	36.504	99.295	1781.93	36.504
SK14_19_97	604	-2893.75	2.06849	0.04828	0.0013132	0.0786	0.00238981	0.01174	0.000295856	0.64488	75.1669	1.86165	76.8278	2.29196	113.012	41.0666	97.9334	75.1669	1.86165
SK14_19_98	260	1017.5	1.87455	0.04909	0.00132515	0.1614	0.0047613	0.02384	0.00054794	0.48394	151.878	3.4808	151.928	4.34124	152.132	42.9906	99.968	151.878	3.4808
SK14_19_99	289.2	-274.875	2.23839	0.0488	0.00147057	0.0783	0.00246218	0.01158	0.000270626	0.52442	74.0973	1.73318	76.5454	2.36379	138.233	49.5183	96.9628	74.0973	1.73318
SK14_19_100	656.5	2728	1.51617	0.04751	0.00124213	0.0849	0.00240275	0.01294	0.000299128	0.70341	82.8983	1.92605	82.7413	2.30239	74.9387	36.5141	100.169	82.8983	1.92605
SK14_19_101	155.3	574.5	2.03272	0.04905	0.0013313	0.0784	0.00231271	0.01151	0.000264371	0.41904	73.6276	1.68476	76.6396	2.21482	150.222	42.7362	96.2616	73.6276	1.68476
SK14_19_102	381	2950	2.54	0.04916	0.00126126	0.1004	0.00312923	0.01465	0.000343874	0.76238	93.6032	2.22229	97.1455	2.93419	155.469	37.7254	96.5097	93.6032	2.22229
SK14_19_103	137.2	16107.7	1.74112	0.09031	0.00188808	3.006	0.0690682	0.2411	0.00557599	0.8701	1389.02	31.0952	1409.14	29.4662	1432.09	31.0544	98.8128	1432.09	31.0544
SK14_19_104	1952	6990.91	28.3721	0.04756	0.00105659	0.0816	0.00191401	0.01255	0.000308871	0.77433	80.4051	2.00653	79.6481	1.85992	77.438	24.4474	100.943	80.4051	2.00653
SK14_19_106	161.9	14750	1.64032	0.10744	0.00223925	4.327	0.109445	0.293	0.0072684	0.93048	1643.71	38.9254	1698.52	36.3743	1756.44	36.8117	97.5262	1756.44	36.8117
SK14_19_107	83	1711.25	0.931538	0.10113	0.00206991	3.758	0.0987169	0.2682	0.00675148	0.90569	1519.48	36.8423	1583.82	34.6353	1644.96	33.8817	96.7065	1644.96	33.8817
SK14_19_108	74.42	-280.667	1.96878	0.047	0.00304854	0.1203	0.00749659	0.01863	0.000427704	-0.17804	119.204	2.71655	115.344	6.81059	49.2271	98.459	103.162	119.204	2.71655
SK14_19_109	250.2	1030.59	1.44708	0.049	0.00170892	0.0773	0.00302492	0.0115	0.000250799	0.51821	73.5686	1.61203	75.6033	2.9218	147.831	66.6936	97.4967	73.5686	1.61203
SK14_19_110	94.7	714.545	2.16854	0.0486	0.00213419	0.091	0.0044858	0.01382	0.000335406	0.43152	88.3873	2.13571	88.4345	4.28773	128.579	97.89	100.051	88.3873	2.13571
SK14_19_111	347.2	869.444	3.21184	0.0494	0.00147856	0.1014	0.00284829	0.01487	0.000382161	0.29191	94.9729	2.41908	98.0678	2.66297	166.86	51.2926	97.0272	94.9729	2.41908
SK14_19_112	93.2	4286.67	1.19029	0.08814	0.00193584	2.794	0.0664724	0.2309	0.00556201	0.83004	1335.54	31.1152	1353.93	28.798	1385.54	32.5132	98.9129	1385.54	32.5132
SK14_19_113	404.8	2188.67	3.36213	0.04773	0.00131197	0.0876	0.00289128	0.01331	0.000339061	0.73305	85.2343	2.20521	85.2652	2.78486	85.9071	41.0371	99.9655	85.2343	2.20521
SK14_19_114	455.3	-3597.5	1.97014	0.04837	0.00110791	0.1037	0.00274618	0.01566	0.000366325	0.70297	100.124	2.33465	100.186	2.62756	117.405	29.977	99.9826	100.124	2.33465
SK14_19_116	58.4	338.364	224.615	0.0478	0.00499239	0.0708	0.0080259	0.01042	0.000268943	0.092051	66.7856	1.7302	69.4583	7.54588	89.3818	134.085	96.2074	66.7856	1.7302
SK14_19_117	74.1	5020	1.20488	0.1147	0.00239552	5.271	0.1271	0.3337	0.00783277	0.90688	1853.16	42.1006	1864.18	39.1616	1875.18	39.0837	99.5769	1875.18	39.0837
SK14_19_118	191	-426.667	1.25658	0.0494	0.00232081	0.0742	0.00398651	0.01101	0.000340717	0.53263	70.4095	2.20396	72.6773	3.6967	166.86	89.9094	97.1241	70.4095	2.20396
SK14_19_119	562	3646.15	1.49072	0.04974	0.00116173	0.1872	0.00526379	0.02725	0.000694208	0.79616	173.269	4.39276	174.237	4.73158	182.861	28.5234	99.4701	173.269	4.39276
SK14_19_120	77	135.2	2.69231	0.05	0.00241661	0.0974	0.00481193	0.01415	0.000358454	0.14898	90.3266	2.28293	94.3735	4.5165	194.993	95.0508	95.9776	90.3266	2.28293
SK14_19_121	294.6	801.154	2.04017	0.0484	0.00170207	0.076	0.00284084	0.01139	0.000278375	0.48635	72.9233	1.76777	74.3773	2.65515	118.867	60.4707	98.1612	72.9233	1.76777
SK14_19_122	238.7	548.919	4.94203	0.0485	0.0017032	0.0901	0.00358569	0.01359	0.000315397	0.39095	86.934	2.00537	87.5965	3.38801	123.73	63.4221	99.3382	86.934	2.00537
SK14_19_123	225.3	-20205	5.61845	0.10613	0.00218069	4.199	0.116678	0.2875	0.00749016	0.97006	1616.09	40.1447	1673.82	37.107	1733.97	35.7542	97.3235	1733.97	35.7542
SK14_19_124	380.3	1935.29	54.3286	0.04903	0.00129119	0.0921	0.00279338	0.01364	0.000383823	0.72302	87.1935	2.43393	89.4577	2.68278	149.266	40.7261	97.6269	87.1935	2.43393
SK14_19_125	151.4	229.2	1.72634	0.049	0.00187627	0.0818	0.00324291	0.01196	0.000293456	0.38227	76.4997	1.8827	79.8358	3.04937	147.831	70.4093	95.9991	76.4997	1.8827
SK14_19_126	1056	-20828.6	4.6438	0.08777	0.00177455	2.621	0.0576529	0.218	0.00479683	0.94168	1263.56	27.5324	1306.54	27.0761	1377.45	28.1326	97.3024	1377.45	28.1326
SK14_19_127	139.2	521.579	2.23077	0.0496	0.00155694	0.1512	0.004476	0.02229	0.000560658	0.5587	141.983	3.53077	142.971	4.07365	176.291	55.5179	99.3996	141.983	3.53077
SK14_19_128	311.2	-2112.73	1.58533	0.0486	0.00154427	0.0779	0.00261483	0.01168	0.000277613	0.45944	74.7538	1.75983	76.1687	2.51553	128.579	55.1651	98.279	74.7538	1.75983
SK14_19_132	2864	9950	34.3405	0.04873	0.00109537	0.0787	0.00197926	0.01181	0.000264935	0.61307	75.57	1.68219	76.922	1.89142	134.86	24.3042	98.3933	75.57	1.68219
SK14_19_133	129.5	1181.76	1.9503	0.0521	0.00158927	0.1679	0.00463855	0.02404	0.000546597	0.45998	152.557	3.48984	157.595	4.21591	289.801	54.5823	97.1722	152.557	3.48984
SK14_19_134	196	1145.38	1.5832	0.0477	0.00169414	0.0766	0.00284728	0.01171	0.000289395	0.31533	75.031	1.86088	74.9433	2.7464	84.4158	60.0527	100.141	75.031	1.86088
SK14_19_136	140.6	169	5.14077	0.0476	0.00194841	0.0844	0.00379596	0.01295	0.000315406	0.34856	82.9526	1.99098	82.2733	3.60081	79.4346	69.9962	100.817	82.9526	1.99098
SK14_19_137	77.6	513.438	2.86347	0.0503	0.00149065	0.2251	0.00766211	0.03259	0.00079205	0.54043	206.726	4.99285	206.146	6.63704	208.88	53.4076	100.287	206.726	4.99285
SK14_19_138	125.7	-789.286	2.5497	0.0474	0.00203438	0.0875	0.00364726	0.01343	0.000353618	0.22545	86.0355	2.28313	85.1718	3.45209	69.4269	67.6835	100.971	86.0355	2.28313
SK14_19_140	175.4	375.4	1.44959	0.05127	0.00118302	0.2265	0.005664	0.0325	0.000700071	0.62066	205.907	4.41721	207.305	5.00306	252.988	26.5878	99.4552	205.907	4.41721
SK14_19_142	101.6	7968.18	1.66831	0.10246	0.00211663	3.686	0.0919763	0.2608	0.00628145	0.93449	1475.73	34.4563	1568.34	33.5848	1669.16	34.709	95.2557	1669.16	34.709
SK14_19_144	935	-3103.33	10.553	0.04889	0.00109371	0.1008	0.00283976	0.01498	0.000360222	0.74798	95.7341	2.3138	97.5145	2.65417	142.559	24.2626	98.2942	95.7341	2.3138
SK14_19_145	173	184.556	1.38622	0.0469	0.0015231	0.0926	0.00335707	0.01441	0.000388148	0.57854	92.3423	2.44515	89.9225	3.16193	44.1381	47.6774	102.566	92.3423	2.44515
SK14_19_147	257.6	1795	6.72585	0.04945	0.001189	0.1411	0.00465335	0.02053	0.000559457	0.76996	130.871	3.5496	134.023	4.2519	169.223	31.5944	97.7478	130.871	3.5496
SK14_19_148	237.5	-1583.08	2.39899	0.0482	0.00161842	0.0844	0.00285295	0.0128	0.000337544	0.51761	81.9332	2.15454	82.2733	2.74671	109.097	59.5476	99.6563	81.9332	2.15454
SK14_19_149	1169	-230400	2.73706	0.04844	0.00107246	0.0973	0.0021879	0.0145	0.000336155	0.72629	92.7344	2.15596	94.281	2.11603	120.814	22.2806	98.4311	92.7344	2.15596
SK14_19_150	220.9	322.642	1.57336	0.0474	0.00177446	0.0743	0.00325856	0.01145	0.000297558	0.33027	73.3995	1.89604	72.7718	3.06964	69.4269	87.0889	100.852	73.3995	1.89604
SK14_19_151	72	246.923	2.6087	0.0492	0.00241003	0.0908	0.00448418	0.01302	0.000328342	0.2249	83.2292	2.11043	88.2483	4.19177	157.373	93.274	94.4954	83.2292	2.11043
SK14_19_152	263.4	60125	2.22278	0.0482	0.00129854	0.0903	0.0031657	0.01358	0.000355902	0.79971	86.9035	2.29588	87.7828	3.05449	109.097	40.722	99.055	86.9035	2.29588
SK14_19_153	156.7	-659.75	2.21955	0.0498	0.00148392	0.1717	0.00550294	0.02464	0.000610288	0.38868	156.793	3.88798	160.893	4.90515	185.669	52.6029	97.527	156.793	3.88798
SK14_19_155	728	43636.4	3.66013	0.08755	0.00176238	2.367	0.0565869	0.1964	0.00476647	0.97747	1142.25	27.2318	1232.7	26.4218	1372.63	27.803	93.7742	1372.63	27.803
SK14_19_156	480	2128.33	1.69611	0.04768	0.00128412	0.0783	0.00231135	0.01186	0.000291828	0.48141	75.9903	1.87603	76.5454	2.2136	83.4207	39.7592	99.2936	75.9903	1.87603
SK14_19_158	742	5785000	3.70444	0.08883	0.00179853	2.848	0.0653333	0.232	0.00558029	0.96465	1340.52	31.1945	1368.28	28.6557	1400.5	28.6454	98.2964	1400.5	28.6454
SK14_19_159	211.6	776.552	2.8711	0.0513	0.00150422	0.1123	0.00382812	0.01585	0.000403719	0.67455	100.954	2.57182	108.067	3.61612	254.333	49.2912	93.8068	100.954	2.57182
SK14_19_160	246.1	197.3	2.16447	0.0486	0.00146792	0.0794	0.00279495	0.01204	0.00030064	0.47714	77.0486	1.89288	77.5807	2.61279	128.579	61.0182	99.4465	77.0486	1.89288
SK14_19_161	206	389.25	1.50365	0.0487	0.00170548	0.0768	0.00260179	0.0115	0.000264197	0.16233	73.5968	1.6992	75.1319	2.50226	133.413	64.709	98.1084	73.5968	1.6992
SK14_19_163	1506	1271	49.377	0.04841	0.00108065	0.0856	0.00221155	0.01288	0.000293186	0.75714	82.4211	1.88261	83.3963	2.11467	119.354	23.386	98.9249	82.4211	1.88261
SK14_19_164	308.1	374.286	2.23585	0.0487	0.00139595	0.0871	0.00296556	0.01306	0.000348031	0.57912	83.537	2.24455	84.7983	2.77779	133.413	48.5871	98.6401	83.537	2.24455
SK14_19_165	98.8	-649.286	3.26504	0.0488	0.00240678	0.0917	0.0043097	0.01407	0.000376412	0.43836	89.9559	2.40596	89.0858	4.01626	138.233	94.1993	101.104	89.9559	2.40596
SK14-28: Buck Creek Trail
SK14_28_1	417.6	-1351.58	2.27823	0.049	0.00170892	0.1724	0.00591005	0.02537	0.000605272	0.15495	161.564	3.85418	161.5	5.29838	147.831	66.335	100.004	161.564	3.85418
SK14_28_2	50.3	217.846	2.2968	0.0512	0.00364672	0.164	0.0124402	0.02358	0.000763156	0.020355	149.832	4.83209	154.198	10.4771	249.844	152.161	97.4342	149.832	4.83209
SK14_28_3	421	-2384.62	4.34021	0.0501	0.00140858	0.2159	0.00630913	0.03125	0.000776032	0.37382	198.36	4.91378	198.492	5.5663	199.635	46.786	99.9371	198.36	4.91378
SK14_28_4	149.7	-583.75	2.27162	0.0496	0.00188257	0.1841	0.00790931	0.02679	0.000668642	0.45615	170.4	4.22576	171.582	7.00157	176.291	71.4188	99.3264	170.4	4.22576
SK14_28_6	201.3	164.8	-143.786	0.0507	0.00297795	0.0744	0.00473963	0.01072	0.000279942	0.32612	68.4478	1.81755	72.8663	4.54395	227.214	143.575	94.3341	68.4478	1.81755
SK14_28_7	1046	2508.33	0.654978	0.04942	0.00121698	0.1735	0.00507256	0.02545	0.000576178	0.74863	161.983	3.65853	162.452	4.56101	167.805	33.5273	99.727	161.983	3.65853
SK14_28_8	43.9	82.55	2.76101	0.0504	0.00647889	0.119	0.016176	0.01688	0.000554593	0.42902	107.602	3.52534	114.165	15.3257	213.483	204.632	94.5187	107.602	3.52534
SK14_28_12	48	170.182	2.77457	0.0505	0.00588728	0.127	0.0152135	0.01839	0.00055828	0.050492	117.155	3.56894	121.398	12.9568	218.073	264.019	96.7662	117.155	3.56894
SK14_28_13	254.8	-787.222	2.87585	0.0502	0.00197434	0.1758	0.00644378	0.02593	0.000609382	0.47879	164.849	3.85523	164.44	5.73733	204.264	79.7154	100.356	164.849	3.85523
SK14_28_14	114.2	418.125	1.71214	0.0495	0.00188152	0.1874	0.00733059	0.02742	0.000690755	0.38138	174.394	4.35027	174.408	6.43145	171.582	73.0288	99.9842	174.394	4.35027
SK14_28_15	403.2	272.647	144	0.0482	0.0022202	0.0724	0.00315225	0.01082	0.000252446	0.16361	69.3048	1.62029	70.9744	2.96143	109.097	81.3737	97.7473	69.3048	1.62029
SK14_28_16	297.7	-755	1.55538	0.0476	0.00212516	0.0919	0.00440207	0.01434	0.000333398	0.27887	91.8141	2.14063	89.2718	3.90389	79.4346	76.6801	102.815	91.8141	2.14063
SK14_28_17	607	22933.3	178.529	0.0478	0.00169527	0.0711	0.00261956	0.01074	0.000261991	0.37841	68.8293	1.67779	69.7428	2.52211	89.3818	60.2416	98.7419	68.8293	1.67779
SK14_28_18	120.4	-388	2.38416	0.0498	0.00306627	0.1032	0.00691521	0.01537	0.000415806	0.14636	98.1001	2.66013	99.7259	6.3243	185.669	172.447	98.5979	98.1001	2.66013
SK14_28_19	56.7	-569.589	3.70588	0.0519	0.00365068	0.247	0.0167453	0.03499	0.000975766	0.41803	221.332	6.29262	224.136	13.8138	281.007	183.351	98.9146	221.332	6.29262
SK14_28_20	113.2	713.962	2.83709	0.0501	0.00373684	0.1133	0.00947495	0.01576	0.000368037	0.35113	100.538	2.34002	108.98	8.69909	199.635	127.829	92.4973	100.538	2.34002
SK14_28_22	855	494	1.40857	0.0503	0.00149065	0.1929	0.00615826	0.02763	0.000700191	0.5475	175.539	4.42744	179.101	5.44435	208.88	53.4076	98.1002	175.539	4.42744
SK14_28_23	29.1	145.062	2.4661	0.0448	0.00974129	0.12	0.0271065	0.01923	0.000816283	0.066858	123.362	5.15007	115.072	25.2469	-66.5181	-2461.17	106.705	123.362	5.15007
SK14_28_24	30.05	134.667	2.83491	0.0392	0.00575366	0.14	0.020195	0.02588	0.00104691	0.021966	166.835	6.6687	133.044	17.2125	-403.406	-371.221	123.802	166.835	6.6687
SK14_28_25	134.5	163.5	1.63426	0.0475	0.00248847	0.1548	0.00802155	0.02322	0.000675105	0.09756	148.257	4.29517	146.141	7.12859	74.4384	88.8005	101.254	148.257	4.29517
SK14_28_26	404.5	-25640	2.19598	0.0472	0.00177232	0.0994	0.00376725	0.01526	0.000349352	0.30031	97.7245	2.24346	96.2223	3.56741	59.358	49.8455	101.462	97.7245	2.24346
SK14_28_28	350	809.444	3.11111	0.05	0.00172047	0.1389	0.00478824	0.02018	0.000474756	0.30294	128.565	3.02692	132.064	4.38401	194.993	70.9149	97.5238	128.565	3.02692
SK14_28_29	332	147.857	4.65638	0.0491	0.00187732	0.102	0.00387964	0.01501	0.000344993	0.24875	95.8993	2.21046	98.6208	3.67484	152.609	69.8877	97.3848	95.8993	2.21046
SK14_28_32	66.3	197.824	3.58378	0.0528	0.00280627	0.179	0.009872	0.0244	0.000713123	0.068478	154.685	4.51232	167.2	8.5873	320.212	117.586	92.9453	154.685	4.51232
SK14_28_33	68.3	238.071	2.48364	0.048	0.00296	0.1592	0.0093583	0.02335	0.00069892	0.12129	148.986	4.44927	150.003	8.2735	99.2691	91.6545	99.1938	148.986	4.44927
SK14_28_34	327.9	-153.6	-655.8	0.0508	0.00215459	0.0779	0.00355912	0.01126	0.000294644	0.16887	71.8736	1.86905	76.1687	3.36352	231.765	101.856	94.7647	71.8736	1.86905
SK14_28_35	131.1	162.571	2.0976	0.0481	0.00296065	0.1406	0.00838554	0.02084	0.000570808	0.2105	133.062	3.58557	133.578	7.50121	104.191	113.681	99.5392	133.062	3.58557
SK14_28_36	584	-618	3.57624	0.04951	0.0012985	0.1388	0.00387249	0.0202	0.00045532	0.48272	128.772	2.88436	131.974	3.56839	172.054	40.8679	97.6854	128.772	2.88436
SK14_28_37	950	850.4	4.54545	0.04895	0.00120351	0.1427	0.00414069	0.02128	0.000504019	0.7283	135.706	3.2026	135.446	3.82533	145.437	33.6881	100.218	135.706	3.2026
SK14_28_39	586	722.778	344.706	0.047	0.00152434	0.0692	0.00243217	0.01059	0.000259537	0.4816	67.9406	1.65258	67.94	2.33452	49.2271	61.0067	99.9538	67.9406	1.65258
SK14_28_41	658	1006.67	438.667	0.0515	0.00173807	0.077	0.00260415	0.01081	0.000242575	0.17116	68.9498	1.53585	75.3205	2.50429	263.273	64.2555	92.0225	68.9498	1.53585
SK14_28_42	471	173.1	1.31933	0.0494	0.0015544	0.1154	0.00340248	0.01711	0.000417972	0.30895	109.199	2.6487	110.893	3.19504	166.86	62.6612	98.6221	109.199	2.6487
SK14_28_43	104.6	-330	3.88848	0.0506	0.0043202	0.1016	0.00922654	0.01463	0.000471715	0.021632	93.3044	3.03413	98.2522	8.55023	222.65	189.305	95.2934	93.3044	3.03413
SK14_28_44	789	-353.6	303.462	0.0486	0.00170434	0.07	0.00277849	0.01045	0.000257257	0.5943	66.909	1.65216	68.6994	2.67913	128.579	69.2823	97.5488	66.909	1.65216
SK14_28_45	148.4	-1070.45	2.33701	0.0474	0.00381952	0.0982	0.00707794	0.01482	0.000387754	0.015328	94.8964	2.48341	95.1134	6.49234	69.4269	130.183	99.7071	94.8964	2.48341
SK14_28_46	56.3	-13325	2.64319	0.0509	0.00490676	0.153	0.0143305	0.02168	0.000732195	0.18718	137.896	4.60824	144.557	12.3885	236.304	213.851	95.6471	137.896	4.60824
SK14_28_48	887	-2330	2.51275	0.0499	0.00126052	0.168	0.00470952	0.02415	0.000590668	0.6567	153.679	3.72079	157.682	4.21824	190.338	36.6459	97.5578	153.679	3.72079
SK14_28_49	113.9	-79.16	2.92051	0.0524	0.00327235	0.115	0.00746324	0.01589	0.000410605	0.31264	101.066	2.57271	110.529	6.8728	302.904	140.765	91.9472	101.066	2.57271
SK14_28_51	59.8	60.6	2.7814	0.0474	0.00381952	0.151	0.011407	0.02312	0.000688414	-0.049615	147.642	4.35969	142.794	10.3167	69.4269	115.72	103.186	147.642	4.35969
SK14_28_52	30.4	-42	76	0.051	0.0100519	0.089	0.0180878	0.01247	0.000488467	0.48663	79.5449	3.12351	86.5714	17.2003	240.83	327.564	92.2819	79.5449	3.12351
SK14_28_54	66.3	412.088	2.02752	0.0499	0.00344761	0.178	0.0134786	0.02529	0.000792423	0.43926	160.875	4.73632	166.338	11.5135	190.338	148.089	96.7923	160.875	4.73632
SK14_28_55	217.2	181.879	362	0.0468	0.00257606	0.073	0.00397764	0.01133	0.000295715	0.14674	72.6886	1.88599	71.5423	3.7831	39.0335	78.0708	101.516	72.6886	1.88599
SK14_28_56	212.1	54650	1.71186	0.0499	0.0016389	0.1591	0.00567584	0.02302	0.00053373	0.56452	146.542	3.38727	149.915	5.07968	190.338	61.641	97.8649	146.542	3.38727
SK14_28_57	40.4	-110	1.76419	0.0464	0.00352437	0.15	0.0133417	0.02424	0.00103108	0.52444	154.934	6.50516	141.912	12.4066	18.4553	64.5945	108.798	154.934	6.50516
SK14_28_58	312.8	2656.67	-195.5	0.0525	0.00234787	0.0826	0.00423546	0.01134	0.00028344	0.52336	72.225	1.8113	80.5864	3.94785	307.249	95.623	90.2025	72.225	1.8113
SK14_28_59	236.7	340.909	71.7273	0.0512	0.00288766	0.0809	0.00506536	0.01122	0.000307336	0.4454	71.5826	1.92996	78.9907	4.77414	249.844	119.595	91.0563	71.5826	1.92996
SK14_28_61	103.6	-93.7	2.20426	0.0439	0.00399761	0.0982	0.00960298	0.01603	0.000425658	0.35952	103.06	2.67772	95.1134	8.92466	-116.3	-310.141	107.783	103.06	2.67772
SK14_28_62	171	204	1.69307	0.0509	0.00233374	0.228	0.0119077	0.03183	0.000841284	0.48629	201.799	5.27506	208.546	9.66497	236.304	95.2153	96.8569	201.799	5.27506
SK14_28_63	283.6	-797.5	3.54057	0.0501	0.00180389	0.1784	0.00614253	0.0254	0.000589969	0.63314	161.528	3.74684	166.683	5.73673	199.635	69.7308	97.007	161.528	3.74684
SK14_28_64	468	1272	2.22222	0.05089	0.00138547	0.1728	0.00491873	0.02438	0.000588773	0.50481	154.936	3.74052	161.846	4.48254	235.851	43.9674	95.942	154.936	3.74052
SK14_28_66	122.7	307	2.66161	0.0535	0.00168372	0.421	0.0130727	0.05714	0.00149896	0.32138	358.297	9.28328	356.766	10.2852	350.061	55.5546	100.404	358.297	9.28328
SK14_28_67	85.6	402.727	2.30108	0.0523	0.00261804	0.173	0.0104872	0.02387	0.000720771	0.63377	151.448	4.54264	162.019	9.20112	298.548	103.121	93.8581	151.448	4.54264
SK14_28_69	298.9	185.429	1.23512	0.0479	0.00195135	0.1331	0.00497255	0.0204	0.000518521	0.11091	130.305	3.28606	126.879	4.56888	94.3329	71.7178	102.604	130.305	3.28606
SK14_28_71	137.4	77.75	54.96	0.0503	0.00480646	0.0727	0.00685596	0.0106	0.000291452	0.21994	67.7189	1.8736	71.2584	6.8248	208.88	208.922	95.3886	67.7189	1.8736
SK14_28_72	161	623.571	3.01498	0.0514	0.00233811	0.1819	0.00842586	0.02591	0.000619783	0.34166	164.472	3.89968	169.694	7.3359	258.809	93.7771	97.1745	164.472	3.89968
SK14_28_74	118.7	-80.4444	2.1121	0.0495	0.00287578	0.198	0.0116911	0.0297	0.000880532	0.30207	188.758	5.57423	183.433	10.0921	171.582	111.077	102.855	188.758	5.57423
SK14_28_75	116.7	245.333	-89.7692	0.0519	0.00403577	0.1052	0.00817538	0.0148	0.000589674	0.33531	94.2267	3.78588	101.565	7.49233	281.007	173.018	93.2484	94.2267	3.78588
SK14_28_76	251.1	-125.167	37.4776	0.0476	0.0018618	0.0967	0.00489799	0.01449	0.000369978	0.34124	92.7699	2.38661	93.7256	4.60037	79.4346	68.7971	98.9466	92.7699	2.38661
SK14_28_77	336.3	357.2	2.10582	0.0491	0.00187732	0.1774	0.00662935	0.02572	0.000724367	0.57318	163.754	4.57962	165.821	5.83476	152.609	72.8311	98.7243	163.754	4.57962
SK14-32: Massie Lake
SK14_32_2	161	3048	2.90614	0.10304	0.00217325	4.304	0.106671	0.3034	0.00749537	0.91728	1711.92	40.7246	1694.13	35.9451	1679.59	35.6723	100.828	1679.59	35.6723
SK14_32_4	355.5	3061.43	3.0673	0.09036	0.00185312	2.411	0.0573251	0.1941	0.00456398	0.82457	1125.14	25.8869	1245.88	26.5275	1433.15	30.1918	91.7863	1433.15	30.1918
SK14_32_5	42.67	166.053	2.88311	0.0527	0.00442729	0.175	0.0144309	0.02405	0.000715724	0.28848	152.503	4.48263	163.749	12.4211	315.902	185.292	93.5587	152.503	4.48263
SK14_32_6	163.8	-553	1.98305	0.0513	0.00215932	0.1536	0.00647512	0.02222	0.000559546	0.30195	141.234	3.51566	145.086	5.78355	254.333	85.2798	97.6466	141.234	3.51566
SK14_32_7	445	1311.21	139.062	0.0529	0.00244118	0.0826	0.00387028	0.01133	0.000277394	0.30337	72.1246	1.75072	80.5864	3.67574	324.51	100.06	90.1234	72.1246	1.75072
SK14_32_8	1782	-8557.14	1370.77	0.04906	0.00118813	0.0756	0.00199403	0.01118	0.000263812	0.54548	71.5236	1.68372	73.9997	1.90535	150.699	32.7228	96.8531	71.5236	1.68372
SK14_32_9	195.7	-1041	3.08189	0.0507	0.00233199	0.1238	0.00621455	0.01751	0.00041357	0.32159	111.552	2.63161	118.511	5.62822	227.214	90.6224	94.4213	111.552	2.63161
SK14_32_10	476.3	-6384.91	1.36086	0.04908	0.00113011	0.1612	0.00407973	0.02388	0.000548636	0.7123	152.133	3.48555	151.753	3.749	151.654	26.4612	100.249	152.133	3.48555
SK14_32_12	147.7	-9358.33	3.55048	0.0505	0.00233026	0.1756	0.00703876	0.02587	0.000570353	-0.11786	164.408	3.61304	164.267	6.62527	218.073	90.6258	100.232	164.408	3.61304
SK14_32_13	203.3	1880.49	-508.25	0.0456	0.00219812	0.0799	0.00366655	0.01296	0.000333594	0.38607	83.2277	2.11424	78.0509	3.47265	-23.4865	-493.216	106.352	83.2277	2.11424
SK14_32_14	130.9	-366.5	3.65642	0.0493	0.00214061	0.2539	0.0108603	0.03766	0.000867301	0.30158	238.809	5.44067	229.739	9.05681	162.123	76.1492	103.732	238.809	5.44067
SK14_32_15	324	2925	1.15302	0.08797	0.00186879	3.026	0.0778696	0.2486	0.00619764	0.93524	1435.6	34.4631	1414.2	30.725	1381.83	30.9841	101.206	1381.83	30.9841
SK14_32_16	285.8	3577.14	3.48112	0.0482	0.0022202	0.1004	0.00474574	0.01499	0.000326772	-0.15435	95.8819	2.0816	97.1455	4.44858	109.097	92.9954	98.733	95.8819	2.0816
SK14_32_17	261.8	-209091	2.49096	0.10557	0.0021844	4.397	0.102676	0.3018	0.00687919	0.90361	1697.03	37.511	1711.78	35.6387	1724.26	35.8238	99.3254	1724.26	35.8238
SK14_32_18	150.2	-6068.18	3.33778	0.0524	0.00208286	0.2199	0.00930497	0.03041	0.000744854	0.49996	192.515	4.69796	201.827	7.91149	302.904	79.8331	95.6831	192.515	4.69796
SK14_32_19	316.1	1102.5	3.15155	0.0504	0.00180722	0.1003	0.00360888	0.01435	0.00036162	0.27528	91.5505	2.30168	97.0532	3.32652	213.483	69.923	94.6373	91.5505	2.30168
SK14_32_20	81.9	522.772	1.97826	0.0514	0.00317124	0.1568	0.00915393	0.02232	0.000655494	0.13938	141.847	4.12201	147.898	8.07159	258.809	129.508	96.216	141.847	4.12201
SK14_32_22	261.1	5456	2.91732	0.0493	0.00155313	0.1225	0.00357246	0.01807	0.000439443	0.47005	115.304	2.80603	117.336	3.49159	162.123	57.1919	98.3899	115.304	2.80603
SK14_32_23	380.2	-2161000	5.37765	0.08747	0.0018956	2.362	0.0606269	0.1949	0.00442769	0.82988	1133.91	25.1465	1231.19	27.393	1370.87	31.7496	93.2322	1370.87	31.7496
SK14_32_24	457	621	1.68635	0.04956	0.00133213	0.1606	0.00482462	0.02354	0.000542727	0.44038	149.892	3.4457	151.228	4.40361	174.409	42.7759	99.1813	149.892	3.4457
SK14_32_25	162.3	32575	2.72315	0.0515	0.00181959	0.1955	0.00626882	0.02741	0.000650402	0.055133	173.888	4.11242	181.311	5.47542	263.273	67.8157	96.1429	173.888	4.11242
SK14_32_26	877.5	3253.68	0.988176	0.0467	0.00144304	0.0785	0.00270276	0.01213	0.000280098	0.49818	77.8102	1.80823	76.7337	2.60175	33.9129	52.085	101.291	77.8102	1.80823
SK14_32_27	181.2	-198.25	3.83087	0.0477	0.00221588	0.0987	0.00537556	0.01504	0.000397594	0.47124	96.2614	2.50395	95.5756	4.98472	84.4158	80.6816	100.687	96.2614	2.50395
SK14_32_29	64.5	-602.174	3.16176	0.0427	0.00340871	0.0856	0.00730349	0.01472	0.000442235	0.49394	94.8225	2.83989	83.3963	6.81489	-185.074	-148.105	112.954	94.8225	2.83989
SK14_32_30	65.2	-302.833	2.62903	0.0522	0.00384447	0.1364	0.00921314	0.01933	0.000563524	0.16194	122.838	3.56852	129.832	8.32346	294.181	163.54	95.0612	122.838	3.56852
SK14_32_31	180.1	392.5	2.50836	0.0523	0.00252668	0.109	0.00600936	0.01538	0.000409289	0.23202	97.8506	2.58606	105.05	5.61071	298.548	99.01	93.6611	97.8506	2.58606
SK14_32_32	555	4535.19	2.63658	0.0472	0.00152681	0.1003	0.00344442	0.01541	0.000384561	0.26907	98.6802	2.47967	97.0532	3.24364	59.358	46.9698	101.575	98.6802	2.47967
SK14_32_33	150.5	352	3.45183	0.0502	0.00206107	0.1108	0.00448561	0.01617	0.000447982	0.43225	103.126	2.8693	106.697	3.91172	204.264	82.6321	96.9144	103.126	2.8693
SK14_32_34	312.2	-1627.78	3.36785	0.0497	0.00223339	0.0896	0.00420134	0.01303	0.000291226	0.29765	83.2398	1.86822	87.1307	3.91093	180.987	90.5658	95.7805	83.2398	1.86822
SK14_32_35	512.8	41340	4.25914	0.10194	0.00208161	3.903	0.0996863	0.2792	0.00692756	0.92862	1579.01	37.8667	1614.3	34.806	1659.74	34.0763	98.3292	1659.74	34.0763
SK14_32_36	90.3	64.8	5.78846	0.0501	0.00197332	0.1737	0.00844741	0.02507	0.000701072	0.5976	159.446	4.4453	162.625	7.45237	199.635	89.9768	98.1516	159.446	4.4453
SK14_32_37	561	-2410.3	2.25664	0.05064	0.00129687	0.1701	0.00480974	0.02457	0.000542562	0.48554	156.184	3.46385	159.506	4.31131	224.477	37.6812	98.0992	156.184	3.46385
SK14_32_38	283	-3893.75	2.15373	0.0491	0.00162921	0.1059	0.00367232	0.01545	0.000357605	0.3644	98.6961	2.25917	102.208	3.3867	152.609	58.6974	96.7005	98.6961	2.25917
SK14_32_39	2346	19460	3.94286	0.11172	0.00231617	4.425	0.102646	0.287	0.006621	0.78226	1601.01	36.1314	1717.03	35.6848	1827.58	37.8689	94.7286	1827.58	37.8689
SK14_32_40	143.2	487.129	7.12438	0.0512	0.00279438	0.0827	0.00507698	0.01198	0.000360982	0.60714	76.4121	2.27956	80.6802	4.78477	249.844	114.621	95.1523	76.4121	2.27956
SK14_32_41	135.2	1006.15	3.97647	0.048	0.00240033	0.1114	0.00547394	0.01693	0.00041503	0.13528	108.249	2.63424	107.245	4.98675	99.2691	92.4778	100.913	108.249	2.63424
SK14_32_42	93.3	6583.33	2.85321	0.0497	0.0021443	0.0991	0.00556492	0.01466	0.000391875	0.76472	93.6023	2.46044	95.9452	5.17145	180.987	87.4834	97.7833	93.6023	2.46044
SK14_32_43	639	20375	4.41298	0.04936	0.00121019	0.1817	0.00446833	0.02677	0.00062893	0.29946	170.325	4.00195	169.522	4.04183	164.967	33.5607	100.459	170.325	4.00195
SK14_32_44	139.2	-547.368	5.25283	0.0494	0.00147856	0.1769	0.00705177	0.02591	0.000673373	0.71697	164.891	4.26201	165.39	5.88492	166.86	50.6735	99.7037	164.891	4.26201
SK14_32_45	101.8	110.167	2.97661	0.0488	0.00231572	0.1525	0.00809645	0.02266	0.000624732	0.56095	144.469	3.95544	144.117	7.50871	138.233	83.3401	100.228	144.469	3.95544
SK14_32_46	160.8	-3672.41	2.25843	0.0512	0.00207089	0.1637	0.00709993	0.0231	0.000579607	0.27732	146.804	3.66533	153.937	6.30733	249.844	80.3525	95.6356	146.804	3.66533
SK14_32_47	346.6	-49902	16.8252	0.09948	0.00215195	3.447	0.0968335	0.2507	0.00584296	0.91246	1425.51	32.1358	1515.18	33.8137	1614.38	36.0187	95.1755	1614.38	36.0187
SK14_32_49	177.4	-713.043	3.89035	0.0468	0.00185367	0.0997	0.0042031	0.0155	0.000392046	0.46212	99.304	2.49074	96.4994	3.90957	39.0335	54.971	102.75	99.304	2.49074
SK14_32_50	119	2348.72	2.92383	0.0488	0.00259086	0.1722	0.00954312	0.02572	0.000645529	0.20626	163.816	4.06233	161.326	8.35866	138.233	98.7766	101.475	163.816	4.06233
SK14_32_51	117.6	154833	3.11111	0.048	0.00204	0.173	0.00745195	0.02635	0.000667704	0.11013	167.965	4.25045	162.019	6.56033	99.2691	74.7146	103.484	167.965	4.25045
SK14_32_52	338	2843.37	2.56061	0.0498	0.00148392	0.1602	0.00489445	0.0234	0.000609199	0.44306	148.962	3.82429	150.878	4.4713	185.669	51.143	98.8269	148.962	3.82429
SK14_32_53	247.4	-187.833	2.65451	0.0472	0.00194451	0.0976	0.00374837	0.01488	0.000358561	0.053975	95.3029	2.25304	94.5585	3.54791	59.358	61.8426	100.695	95.3029	2.25304
SK14_32_56	222.5	-930.172	2.66467	0.0478	0.00221674	0.1034	0.0042387	0.01566	0.00037161	-0.019074	100.196	2.38864	99.91	3.94693	89.3818	78.3447	100.259	100.196	2.38864
SK14_32_57	240.1	-10700	1.39674	0.0485	0.00154302	0.114	0.00384817	0.01698	0.000415846	0.22112	108.498	2.63714	109.618	3.55654	123.73	55.4862	99.0178	108.498	2.63714
SK14_32_58	175.3	960	1.48938	0.0494	0.00196625	0.1667	0.00677684	0.0246	0.000621662	0.24	156.62	3.94631	156.551	6.07132	166.86	75.399	100.071	156.62	3.94631
SK14_32_59	62.8	356.154	3.90062	0.0498	0.00250639	0.1596	0.00697344	0.02302	0.000643792	0.13129	146.561	4.05181	150.353	6.18561	185.669	102.185	97.5798	146.561	4.05181
SK14_32_60	289.4	-1751.11	1.42211	0.0507	0.00164869	0.1201	0.00432777	0.01721	0.000403204	0.5026	109.652	2.5473	115.163	3.93066	227.214	60.8289	95.5161	109.652	2.5473
SK14_32_61	145.6	88.3333	0.884569	0.0519	0.00298621	0.1228	0.00722993	0.01717	0.000402522	0.28027	109.231	2.53871	117.607	6.54298	281.007	119.02	93.3151	109.231	2.53871
SK14_32_62	960	8942.11	1.05263	0.0554	0.00129482	0.4254	0.0127529	0.05599	0.00141193	0.78438	350.359	8.71844	359.905	9.90482	428.402	28.4114	97.5792	350.359	8.71844
SK14_32_63	206.1	868.142	5.21772	0.05	0.00180278	0.0998	0.00394259	0.01481	0.000466191	0.61605	94.5192	2.97191	96.5917	3.65244	194.993	69.1701	98.1154	94.5192	2.97191
SK14_32_64	74.9	266.479	2.20294	0.0485	0.00305792	0.1058	0.00626797	0.01597	0.000452124	0.074683	102.078	2.9285	102.116	5.7741	123.73	123.755	100.019	102.078	2.9285
SK14_32_65	216.7	-1406.56	2.49367	0.0477	0.00194939	0.0814	0.00350148	0.01243	0.000306923	0.22327	79.6253	1.99333	79.4603	3.30883	84.4158	70.5213	100.22	79.6253	1.99333
SK14_32_66	258	1627.5	2.26913	0.0478	0.00177875	0.1038	0.00398369	0.01568	0.000377419	0.26442	100.324	2.44681	100.278	3.69422	89.3818	65.3789	100.017	100.324	2.44681
SK14_32_67	302.7	29600	1.25394	0.0476	0.00169302	0.1021	0.00422608	0.01537	0.000409139	0.30485	98.3753	2.60106	98.713	3.935	79.4346	55.3863	99.6097	98.3753	2.60106
SK14_32_68	239	-668.75	20.6034	0.0487	0.00170548	0.0935	0.00345064	0.01411	0.000340201	0.45253	90.2219	2.16572	90.7586	3.25488	133.413	64.2159	99.5203	90.2219	2.16572
SK14_32_69	141.9	-11479	1.99859	0.1048	0.00216952	4.317	0.0992754	0.3002	0.00694968	0.81863	1689.87	37.8225	1696.61	35.2107	1710.81	35.5923	99.7458	1710.81	35.5923
SK14_32_70	89.5	213	2.96358	0.0503	0.00269482	0.1025	0.00672031	0.01477	0.000465684	0.46493	94.2291	2.96839	99.0814	6.23415	208.88	114.96	95.3935	94.2291	2.96839
SK14_32_72	146.5	913.846	2.66849	0.0495	0.00196726	0.1756	0.00747624	0.02544	0.000653435	0.31111	161.904	4.15175	164.267	6.58406	171.582	76.1079	98.5865	161.904	4.15175
SK14_32_73	295.9	-698.5	2.75512	0.0486	0.00195826	0.0973	0.00340983	0.01467	0.000355082	0.035004	93.7972	2.28155	94.281	3.21359	128.579	73.8031	99.5768	93.7972	2.28155
SK14_32_74	235.5	-2245.95	2.17452	0.0508	0.00189533	0.1538	0.00604167	0.02205	0.000497374	0.61104	140.25	3.17913	145.262	5.35794	231.765	71.5423	96.7902	140.25	3.17913
SK14_32_75	76.9	-87.75	2.82721	0.0523	0.00280252	0.1048	0.00569941	0.01449	0.000431722	0.043533	92.2152	2.78497	101.197	5.30591	298.548	115.721	91.6409	92.2152	2.78497
SK14_32_76	426.4	427.4	4.4463	0.04857	0.00137278	0.1051	0.0035012	0.01571	0.000377918	0.68581	100.416	2.39177	101.473	3.29775	127.125	44.7648	99.0271	100.416	2.39177
SK14_32_77	98	323	4.26087	0.0522	0.00270923	0.216	0.0118179	0.03043	0.00095812	0.1235	192.69	5.99168	198.575	10.0323	294.181	111.741	97.3127	192.69	5.99168
SK14_32_78	126.1	4980	2.15188	0.0495	0.00223161	0.1272	0.00569929	0.01917	0.000474758	0.38451	122.248	3.03477	121.579	5.20576	171.582	89.4105	100.682	122.248	3.03477
SK14_32_79	376	2990	3.40888	0.0489	0.00213693	0.0844	0.00415805	0.01268	0.000329261	0.38251	81.096	2.07757	82.2733	3.96115	143.039	103.858	98.7278	81.096	2.07757
SK14_32_80	622	3287.5	1.36404	0.0507	0.00118334	0.1893	0.00550761	0.02684	0.000657689	0.8048	170.476	4.16771	176.032	4.8948	227.214	28.6383	96.9942	170.476	4.16771
SK14_32_81	169.4	209.857	1.8991	0.0494	0.00196625	0.1864	0.00793083	0.02788	0.000729258	0.58861	177.316	4.58125	173.553	6.93327	166.86	76.3806	102.14	177.316	4.58125
SK14_32_82	113.5	-139.714	1.4477	0.0482	0.00204188	0.1827	0.0078078	0.02766	0.000780083	0.39154	176.197	4.90074	170.381	6.8158	109.097	76.694	103.231	176.197	4.90074
SK14_32_83	425.2	-496.75	0.682504	0.0494	0.00179615	0.1002	0.00360777	0.01475	0.000362112	0.29499	94.2102	2.28767	96.9609	3.40741	166.86	78.4614	97.3487	94.2102	2.28767
SK14_32_84	160.5	-141	2.28307	0.0486	0.00187211	0.1485	0.00616287	0.02255	0.000589747	0.43027	143.809	3.74716	140.587	5.56545	128.579	69.2823	102.251	143.809	3.74716
SK14_32_85	102.6	15180	5.86286	0.0526	0.00262044	0.1702	0.00990339	0.02358	0.000794988	0.49254	149.564	4.98123	159.593	8.7153	311.581	104.047	94.141	149.564	4.98123
SK14_32_86	48.4	-830	1.64626	0.0471	0.00469546	0.0899	0.00878594	0.01403	0.000464367	0.073542	89.8956	2.92126	87.4102	8.20763	54.3003	147.391	102.751	89.8956	2.92126
SK14_32_87	78.9	109.667	2.09284	0.0509	0.00260698	0.1879	0.00847836	0.02664	0.000751516	0.016208	169.174	4.72187	174.836	7.38531	236.304	107.515	96.9394	169.174	4.72187
SK14_32_88	134.8	-3896	1.73935	0.08777	0.00186503	2.785	0.0685747	0.2307	0.00524776	0.8639	1335.07	29.6854	1351.52	29.1845	1377.45	30.9044	99.0119	1377.45	30.9044
SK14_32_89	524	267778	1.02745	0.11071	0.00227218	4.525	0.12013	0.2999	0.00762011	0.95869	1674.53	40.5014	1735.58	37.4302	1811.1	37.1834	97.4208	1811.1	37.1834
SK14_32_90	35.71	50.2333	3.24636	0.0484	0.00392135	0.18	0.0164	0.02674	0.000921147	0.50561	170.344	5.81035	168.061	14.4843	118.867	172.914	101.221	170.344	5.81035
SK14_32_91	618.9	26605.3	3.82273	0.06145	0.00128641	0.883	0.0225361	0.1053	0.00247492	0.90471	645.17	15.0769	642.602	14.7817	655.023	18.4563	100.435	645.17	15.0769
SK14_32_92	81.8	1206.94	3.58772	0.0486	0.00204567	0.2289	0.0100084	0.03443	0.000926591	0.2775	218.742	5.86726	209.29	8.50768	128.579	80.7763	104.264	218.742	5.86726
SK14_32_93	931	14413.8	8.49453	0.04869	0.00122914	0.0975	0.00301538	0.01451	0.000383035	0.75801	92.7685	2.4485	94.466	2.8259	132.93	35.7397	98.3056	92.7685	2.4485
SK14_32_94	112.5	10176.5	7.16561	0.09185	0.00196231	3.152	0.0792341	0.2505	0.00583953	0.84324	1438.93	32.9162	1445.49	31.3029	1464.29	32.4612	99.6931	1464.29	32.4612
SK14_32_95	361.5	18133.7	1.09778	0.10609	0.00217542	4.106	0.096668	0.28	0.00671193	0.93503	1574.58	36.181	1655.5	34.588	1733.28	35.6456	96.1259	1733.28	35.6456
SK14_32_96	43.84	-464.643	3.77931	0.0517	0.00491011	0.138	0.0132898	0.01935	0.000542373	0.079637	123.043	3.43123	131.261	11.3302	272.164	187.778	94.1229	123.043	3.43123
SK14_32_97	157.9	814.667	2.85018	0.0491	0.00187732	0.1713	0.00665037	0.02518	0.000649394	0.15594	160.344	4.12889	160.547	5.85952	152.609	69.9358	99.8532	160.344	4.12889
SK14_32_98	503.5	9909.09	0.991142	0.0486	0.00187211	0.094	0.00379795	0.01417	0.000384598	0.5212	90.6153	2.48376	91.2227	3.51185	128.579	71.9285	99.432	90.6153	2.48376
SK14_32_100	608.4	-256.333	1.59184	0.0476	0.0018618	0.0811	0.00273329	0.01252	0.000291891	0.13551	80.2096	1.88527	79.1786	2.6297	79.4346	66.0551	101.3	80.2096	1.88527
SK14_32_101	115.7	-1172.92	2.56541	0.0522	0.00199498	0.2282	0.00895098	0.03196	0.000764838	0.32272	202.281	4.80545	208.712	7.64383	294.181	76.0793	97.1693	202.281	4.80545
SK14_32_102	252.2	151.875	2.44143	0.0506	0.00189318	0.1093	0.00395836	0.01579	0.000363496	0.11267	100.664	2.29244	105.325	3.74858	222.65	74.0086	95.8877	100.664	2.29244
SK14_32_103	138.3	871.875	-76.8333	0.0524	0.00271078	0.0958	0.00507553	0.01313	0.000318369	0.20219	83.5868	2.05358	92.892	4.78016	302.904	115.054	90.5251	83.5868	2.05358
SK14_32_104	326	3477.11	1.16595	0.05073	0.00130454	0.2045	0.00544868	0.02911	0.000706369	0.51093	184.754	4.45948	188.927	4.82492	228.581	39.3401	97.9087	184.754	4.45948
SK14_32_105	66.9	4953.64	1.25281	0.0915	0.0023041	3.343	0.0989912	0.2652	0.00664322	0.76117	1522.29	36.4728	1491.16	34.3346	1457.03	41.1262	101.692	1457.03	41.1262
SK14_32_106	55	111.3	1.80328	0.0493	0.00334846	0.1348	0.00987514	0.01992	0.000557515	0.42096	127.032	3.49281	128.402	8.89226	162.123	131.765	99.0254	127.032	3.49281
SK14_32_107	548	6785.71	1.77864	0.0494	0.0015544	0.1155	0.00370757	0.01709	0.000406482	0.54516	109.072	2.59047	110.984	3.49498	166.86	53.7011	98.427	109.072	2.59047
SK14_32_108	103.3	899.099	4.09921	0.0516	0.00182072	0.2273	0.00834662	0.03189	0.000763668	0.56263	201.996	4.80146	207.967	7.13876	267.725	66.3722	97.3068	201.996	4.80146
SK14_32_110	68.4	64	2.35862	0.0514	0.00345641	0.1071	0.00693889	0.01532	0.000495965	0.40202	97.5831	3.16321	103.309	6.44654	258.809	140.284	94.8708	97.5831	3.16321
SK14_32_111	423	17611.8	2.61111	0.0889	0.00181609	2.845	0.0791367	0.2318	0.0062556	0.97055	1339.27	34.6131	1367.49	31.1957	1402.01	29.1593	98.2768	1402.01	29.1593
SK14_32_114	236	-1366.67	3.84365	0.0499	0.00241578	0.0812	0.0043171	0.01199	0.00029984	0.30153	76.6028	1.94417	79.2725	4.11627	190.338	100.25	96.9224	76.6028	1.94417
SK14_32_115	169.5	-2938.46	7.5	0.048	0.00212876	0.0964	0.00480387	0.0146	0.000411539	0.3052	93.4232	2.66514	93.4478	4.50779	99.2691	80.9817	99.9886	93.4232	2.66514
SK14_32_116	65.7	605.833	4.0061	0.0539	0.00209811	0.273	0.0131838	0.03648	0.00111262	0.45427	230.064	6.9277	245.089	10.8678	366.874	77.2085	94.2421	230.064	6.9277
SK14_32_117	93.7	969.863	2.65439	0.0489	0.00296589	0.1662	0.0099704	0.02468	0.00065463	0.15125	157.225	4.14602	156.116	8.69141	143.039	122.638	100.673	157.225	4.14602
SK14_32_118	427.8	99633.3	1.91839	0.08918	0.00185786	2.779	0.0747605	0.2265	0.00591277	0.92633	1308.99	32.8806	1349.91	29.9688	1408.03	30.2328	97.4975	1408.03	30.2328
SK14_32_119	237.9	789.231	4.07363	0.0488	0.00170663	0.0946	0.0038039	0.01395	0.000361581	0.50307	89.1922	2.32952	91.7795	3.51644	138.233	64.1677	97.305	89.1922	2.32952
SK14_32_120	132.1	130.5	2.50189	0.0502	0.00214896	0.1763	0.00765981	0.02572	0.000639537	0.38672	163.525	4.05511	164.872	6.76117	204.264	89.1319	99.2926	163.525	4.05511
SK14_32_121	750	8871.43	1.01626	0.04847	0.00137845	0.0909	0.002489	0.01354	0.000304849	0.58773	86.6189	1.95659	88.3414	2.38292	122.272	45.5389	98.1406	86.6189	1.95659
SK14_32_122	398	2761.9	1.59839	0.05012	0.00134715	0.1961	0.00589424	0.02843	0.000657424	0.56338	180.617	4.17791	181.821	5.18813	200.562	43.3691	99.3916	180.617	4.17791
SK14_32_123	145	-135500	1.42998	0.0488	0.00268376	0.082	0.00507244	0.01217	0.000321471	0.49818	77.8573	2.02802	80.0235	4.7827	138.233	98.7766	97.4455	77.8573	2.02802
SK14_32_124	46.5	8474.42	1.01087	0.0939	0.00234241	3.355	0.110663	0.2592	0.00720235	0.87959	1483.76	39.4283	1493.96	35.9622	1506.1	41.1399	99.4504	1506.1	41.1399
SK14_32_126	216.3	-65166.7	1.15607	0.10406	0.00214518	4.165	0.101503	0.2921	0.00719506	0.94243	1646.3	39.0139	1667.16	34.8074	1697.76	35.1537	99.0914	1697.76	35.1537
SK14_32_127	4145	3532.86	57.8911	0.04911	0.00106053	0.1313	0.00376641	0.0194	0.000529286	0.90587	123.767	3.37728	125.265	3.47024	153.086	19.3791	98.8805	123.767	3.37728
SK14_32_128	79.5	-4422	2.75087	0.0737	0.00183921	1.846	0.0551732	0.1801	0.00468769	0.7393	1069.25	26.7283	1062	25.439	1033.26	36.4351	100.519	1033.26	36.4351
SK14_32_129	145.1	-33846.2	2.54561	0.10603	0.00226297	4.314	0.106246	0.2965	0.00669141	0.84715	1666.38	36.9379	1696.04	35.9809	1732.24	37.3674	98.6964	1732.24	37.3674
SK14_32_130	37	-193.571	2.93651	0.0501	0.00470787	0.165	0.0163368	0.024	0.000924392	0.29393	152.693	5.85587	155.07	14.4344	199.635	199.675	98.5917	152.693	5.85587
SK14_32_131	58.4	-2457.14	2.36437	0.0472	0.0044024	0.124	0.0122536	0.01942	0.000673316	0.96261	124.195	4.29632	118.692	11.3163	59.358	152.639	104.463	124.195	4.29632
SK14_32_132	1574	4337.75	8.15122	0.04834	0.00108844	0.0896	0.00227404	0.01356	0.00031488	0.75395	86.7607	2.00194	87.1307	2.17437	115.942	24.3075	99.6503	86.7607	2.00194
SK14_32_133	95.9	371.5	2.64187	0.051	0.00224508	0.1755	0.0072118	0.02557	0.000729335	0.12309	162.414	4.6249	164.181	6.03923	240.83	103.977	99.1361	162.414	4.6249
SK14_32_134	278.5	39784.3	6.32955	0.08817	0.00183567	2.9	0.064846	0.2397	0.0053612	0.84638	1385.05	30.1887	1381.91	28.6646	1386.19	29.8269	100.233	1386.19	29.8269
SK14_32_135	1186	34979.9	25.6156	0.08919	0.00183727	2.966	0.0726833	0.2416	0.00563544	0.90221	1393.88	31.6513	1398.95	30.0636	1408.24	29.7242	99.7182	1408.24	29.7242
SK14_32_136	80.1	2241.54	2.56731	0.0759	0.00187465	1.876	0.0609241	0.1782	0.00528319	0.78816	1055.34	29.7509	1072.65	27.3785	1092.43	37.1225	98.5534	1092.43	37.1225
SK14-40C: Red Mountain
SK14_40C_1	197.1	35289.5	2.11028	0.0987	0.0020519	3.785	0.0891038	0.2795	0.00634414	0.87952	1587.62	35.536	1589.57	33.3281	1599.7	33.8338	99.9544	1599.7	33.8338
SK14_40C_3	208.2	106.833	1.13029	0.0472	0.00177232	0.0815	0.00404313	0.01222	0.000281658	0.45781	78.3353	1.79225	79.5542	3.84685	59.358	57.5983	98.4206	78.3353	1.79225
SK14_40C_4	311.2	4773.08	5.33791	0.0492	0.00171122	0.1058	0.00408992	0.01566	0.000351702	0.41147	100.018	2.23602	102.116	3.79662	157.373	66.0701	98.0928	100.018	2.23602
SK14_40C_5	944	-38510	1.86193	0.04859	0.00128452	0.1074	0.00286774	0.01612	0.000359919	0.37939	103.02	2.28992	103.584	2.67974	128.094	40.7455	99.5205	103.02	2.28992
SK14_40C_7	72.4	224.471	2.59498	0.0484	0.00343904	0.142	0.0103955	0.02167	0.000708121	0.51805	138.272	4.46211	134.824	9.49263	118.867	138.698	102.506	138.272	4.46211
SK14_40C_8	150.1	-9066.67	3.35045	0.10586	0.00223952	4.407	0.10719	0.3032	0.00695213	0.84221	1704.19	38.0756	1713.66	35.9964	1729.3	36.9493	99.6208	1729.3	36.9493
SK14_40C_10	239.6	-2470	2.09441	0.10975	0.00224903	5.469	0.128794	0.3616	0.00821656	0.91279	2026.23	44.4765	1895.74	39.2097	1795.26	36.8076	104.959	1795.26	36.8076
SK14_40C_11	160.4	2670	0.839791	0.10368	0.00222257	4.156	0.106761	0.2904	0.00694067	0.86519	1637.66	37.8285	1665.39	35.756	1691.02	36.6035	98.6872	1691.02	36.6035
SK14_40C_12	162.2	7425	3.76334	0.10739	0.00222736	4.76	0.121816	0.3218	0.0082117	0.8999	1804.93	43.363	1777.87	37.8616	1755.59	36.5091	101.161	1755.59	36.5091
SK14_40C_13	446	3110	7.65009	0.08839	0.00182667	2.617	0.0640974	0.2158	0.00543303	0.88555	1250.16	30.7347	1305.42	27.9592	1390.97	29.5621	96.4932	1390.97	29.5621
SK14_40C_14	95.5	1032.6	2.13647	0.0876	0.0020173	2.895	0.0698098	0.2392	0.00544487	0.79951	1383.27	31.0118	1380.61	29.3687	1373.73	35.2046	100.14	1373.73	35.2046
SK14_40C_16	157.5	-3633.33	0.997467	0.10928	0.00237524	4.614	0.111735	0.3045	0.00739784	0.86052	1703.42	39.9591	1751.8	36.7238	1787.45	39.1677	97.8183	1787.45	39.1677
SK14_40C_17	790	-72328.8	2.25071	0.10412	0.00212047	4.197	0.105555	0.2928	0.00709174	0.96726	1650.07	38.558	1673.43	35.906	1698.82	34.6902	98.9287	1698.82	34.6902
SK14_40C_18	151.3	-481.1	2.4844	0.0483	0.00382402	0.0924	0.00821067	0.0141	0.000390415	0.31529	90.2042	2.47891	89.7366	7.6255	113.989	227.99	100.583	90.2042	2.47891
SK14_40C_22	175.3	4242.86	1.50991	0.0479	0.00324465	0.098	0.00602757	0.01483	0.000381538	-0.27596	94.8998	2.41917	94.9285	5.63656	94.3329	122.647	99.9683	94.8998	2.41917
SK14_40C_23	1194	708.25	234.118	0.048	0.0018659	0.0688	0.00294166	0.01055	0.000270963	0.55312	67.5987	1.74292	67.5601	2.84049	99.2691	72.4936	100.138	67.5987	1.74292
SK14_40C_24	100.1	1035	1.97826	0.15615	0.00327616	7.8	0.230729	0.3668	0.0106352	0.94982	1920.02	51.502	2208.21	47.6828	2414.39	49.5253	91.22	2414.39	49.5253
SK14_40C_25	313.4	-135.143	1.58363	0.0458	0.00184365	0.0833	0.00308797	0.01331	0.000327051	0.16637	85.4437	2.08928	81.2428	2.98274	-12.9009	-96.0405	104.915	85.4437	2.08928
SK14_40C_26	953	-4437.5	33.7943	0.08453	0.00176299	1.904	0.0517212	0.1639	0.00418393	0.95569	962.416	24.2566	1082.49	24.7557	1304.78	28.7216	90.3856	962.416	24.2566
SK14_40C_27	50.7	2034.86	1.23058	0.1125	0.00270416	4.79	0.15355	0.3094	0.00972324	0.86969	1723.02	50.3444	1783.15	41.9102	1840.19	44.5009	97.4543	1840.19	44.5009
SK14_40C_29	646	28321.4	1.36835	0.09922	0.00206742	3.74	0.103131	0.2745	0.0070986	0.95596	1558.55	38.6905	1579.97	34.9829	1609.5	33.703	98.9639	1609.5	33.703
SK14_40C_31	1434	-76040	9.56	0.04727	0.00114729	0.0765	0.00214264	0.01193	0.00028728	0.56398	76.4769	1.82726	74.849	2.04897	62.8891	30.971	102.14	76.4769	1.82726
SK14_40C_32	168.8	-76.7143	2.39433	0.0488	0.00296523	0.0968	0.00573656	0.01453	0.000410546	0.17497	92.8827	2.58509	93.8182	5.34639	138.233	118.518	99.1198	92.8827	2.58509
SK14_40C_33	734	4470	11.9739	0.08752	0.0018124	2.62	0.0717409	0.2182	0.00572141	0.96051	1265.1	32.1848	1306.26	29.6413	1371.97	29.2047	97.4043	1371.97	29.2047
SK14_40C_34	140.9	103.25	-704.5	0.0515	0.00288979	0.0939	0.00534106	0.01327	0.000315178	0.29635	84.5715	2.01464	91.1299	4.95402	263.273	117.129	93.2529	84.5715	2.01464
SK14_40C_35	178.8	28232.6	7.01176	0.10855	0.00227203	4.555	0.109083	0.3051	0.00713613	0.89643	1708.48	38.584	1741.08	36.5178	1775.22	37.1699	98.5913	1775.22	37.1699
SK14_40C_37	785	18838.7	0.991162	0.0878	0.00179879	2.461	0.0627982	0.2035	0.00505617	0.96214	1181.87	28.4526	1260.66	27.9258	1378.11	28.814	94.7201	1378.11	28.814
SK14_40C_39	1227	1744.28	42.6042	0.04755	0.00124274	0.0847	0.00247177	0.01294	0.000309641	0.69952	82.8941	1.98957	82.5541	2.37063	76.9384	36.0673	100.397	82.8941	1.98957
SK14_40C_40	258.8	9516.48	1.59556	0.11017	0.00234414	4.701	0.124755	0.3084	0.00751892	0.92688	1723.02	40.2922	1767.42	38.4007	1802.21	38.3175	98.0429	1802.21	38.3175
SK14_40C_41	487	-2245.76	1.96055	0.0479	0.00186488	0.0827	0.00342574	0.01247	0.000301828	0.2671	79.8601	1.93903	80.6802	3.23108	94.3329	71.7571	99.0202	79.8601	1.93903
SK14_40C_42	585.5	16895.2	1.42112	0.10543	0.00223468	4.066	0.109279	0.2786	0.00703827	0.94415	1568.23	38.1858	1647.51	36.2058	1721.83	36.8082	96.1637	1721.83	36.8082
SK14_40C_43	93.2	641.25	3.09635	0.0494	0.0031585	0.176	0.0106014	0.02591	0.000762975	0.30709	164.891	4.80876	164.613	9.5155	166.86	125.189	100.174	164.891	4.80876
SK14_40C_44	65	-4090.91	2.35507	0.1081	0.0024727	4.78	0.153425	0.3198	0.0104785	0.88521	1791.89	54.5222	1781.39	40.8652	1767.64	41.1235	100.413	1767.64	41.1235
SK14_40C_46	1063	25950	43.3878	0.08793	0.0017749	2.696	0.0689664	0.2218	0.0056505	0.9873	1284.68	31.3209	1327.36	29.1347	1380.96	28.1231	97.2892	1380.96	28.1231
SK14_40C_47	224.7	5790	4.31286	0.0882	0.00186978	2.878	0.0673658	0.2359	0.00559102	0.87371	1363.59	31.6105	1376.17	29.021	1386.84	31.0737	99.2136	1386.84	31.0737
SK14_40C_48	988	10535.7	7.96132	0.04874	0.00126104	0.092	0.00279206	0.01368	0.000377435	0.77556	87.4804	2.43788	89.3648	2.68332	135.343	37.4686	98.0131	87.4804	2.43788
SK14_40C_49	305	1107.41	5.82061	0.0503	0.00214989	0.0928	0.00413941	0.01337	0.000311613	0.35792	85.3368	1.97656	90.1084	3.84837	208.88	86.1725	95.0161	85.3368	1.97656
SK14_40C_50	137	664.545	2.3339	0.0476	0.00194841	0.1554	0.00563468	0.02376	0.000602258	0.081518	151.659	3.80898	146.669	5.12457	79.4346	67.5838	103.209	151.659	3.80898
SK14_40C_51	382.9	6110	2.92513	0.10348	0.00211585	4.092	0.107693	0.2839	0.00756569	0.97245	1601.87	40.5504	1652.71	35.8991	1687.46	34.706	97.4747	1687.46	34.706
SK14_40C_52	2650	3957.89	6.30952	0.04782	0.00111337	0.0844	0.00261713	0.0127	0.000329569	0.87502	81.3352	2.14547	82.2733	2.51476	90.3732	32.715	98.8826	81.3352	2.14547
SK14_40C_53	791	1193.5	56.0993	0.05019	0.00138207	0.0914	0.00301688	0.01328	0.00033859	0.62085	84.7768	2.13447	88.8067	2.82761	203.802	50.5787	95.7641	84.7768	2.13447
SK14_40C_54	744	18840	9.38209	0.08787	0.00179389	2.715	0.0625259	0.2265	0.0052736	0.94008	1311.24	29.704	1332.57	28.1581	1379.64	28.7017	98.7665	1379.64	28.7017
SK14_40C_55	207.4	11084.6	2.02935	0.10561	0.00224477	4.467	0.125402	0.3076	0.0082521	0.93626	1729.42	43.883	1724.86	38.0304	1724.96	36.8671	100.233	1724.96	36.8671
SK14_40C_56	251.9	156.667	2.67694	0.0485	0.00195727	0.1123	0.00485124	0.01694	0.000466032	0.40529	108.244	2.94662	108.067	4.54551	123.73	76.491	100.204	108.244	2.94662
SK14_40C_57	390	182429	1.41304	0.10592	0.00223106	4.32	0.111198	0.2976	0.00758395	0.92414	1672.77	40.5505	1697.19	36.3485	1730.34	36.629	98.9519	1730.34	36.629
SK14_40C_59	45.4	-534.783	4.36538	0.0475	0.00401404	0.163	0.0143745	0.02489	0.000810805	0.12968	158.834	5.25626	153.326	12.4104	74.4384	105.465	103.366	158.834	5.25626
SK14_40C_60	236	23933.3	3.61963	0.0504	0.00278856	0.0984	0.00574744	0.01436	0.000437474	0.47171	91.614	2.78206	95.2983	5.35578	213.483	117.493	96.4467	91.614	2.78206
SK14_40C_61	540.8	308.4	9.38889	0.0476	0.00169302	0.0869	0.00364152	0.01339	0.000353011	0.4762	85.7585	2.21461	84.6115	3.44472	79.4346	61.8029	101.339	85.7585	2.21461
SK14_40C_62	284.9	-117462	3.39976	0.10506	0.00221159	3.681	0.0968964	0.2547	0.00635522	0.91933	1436.92	34.8104	1567.26	34.3305	1715.37	36.3463	93.3268	1715.37	36.3463
SK14_40C_63	707	-27166.7	34.8276	0.08822	0.00180699	2.814	0.0696307	0.2326	0.00588227	0.95284	1344.97	32.9084	1359.27	29.3274	1387.28	28.9898	99.179	1387.28	28.9898
SK14_40C_65	306.4	-14200	2.31245	0.10578	0.0022132	4.125	0.0980574	0.2839	0.00667006	0.90417	1596.87	36.1102	1659.27	34.9615	1727.91	36.2665	97.0894	1727.91	36.2665
SK14_40C_66	1046	6077	18.915	0.10554	0.002128	3.981	0.0973414	0.2743	0.00656172	0.97092	1544.19	35.6435	1630.33	34.4128	1723.74	34.7938	95.8451	1723.74	34.7938
SK14_40C_67	544.8	19357.1	8.21719	0.08829	0.00184652	2.867	0.0682413	0.2356	0.0056403	0.91315	1361.74	31.5735	1373.28	29.1289	1388.8	30.2601	99.3081	1388.8	30.2601
SK14_40C_69	619	22317.5	2.39088	0.06198	0.00131206	0.895	0.0227247	0.1044	0.00245962	0.90497	639.37	15.0248	649.052	15.1464	673.419	20.1662	98.6274	639.37	15.0248
SK14_40C_71	98.5	5581.82	0.731255	0.1041	0.00235472	4.04	0.136487	0.2851	0.00849722	0.93097	1607.2	45.234	1642.29	40.6564	1698.47	39.4226	98.46	1698.47	39.4226
SK14_40C_72	2662	-10098.6	3.96308	0.04828	0.00117528	0.0823	0.00236629	0.01218	0.000321622	0.79152	77.9727	2.09536	80.305	2.26713	113.012	32.3682	97.1832	77.9727	2.09536
SK14_40C_73	2015	-641000	4.31478	0.04855	0.00120289	0.098	0.00294646	0.0146	0.000348373	0.71033	93.3578	2.21923	94.9285	2.75807	126.156	37.5041	98.429	93.3578	2.21923
SK14_40C_75	170.1	10660	2.7086	0.1052	0.00226548	4.24	0.131115	0.2913	0.00880354	0.94335	1639.28	46.4082	1681.8	39.1438	1717.81	37.0925	97.9915	1717.81	37.0925
SK14_40C_76	678.7	9589.8	0.690437	0.05087	0.00129426	0.2295	0.00559536	0.03292	0.000851522	0.52862	208.646	5.31858	209.786	4.9359	234.944	34.7253	99.529	208.646	5.31858
SK14_40C_77	114.5	-765	3.35777	0.10637	0.00231781	3.737	0.112437	0.2549	0.00721107	0.88962	1435.48	38.4064	1579.33	36.3629	1738.12	38.272	92.6783	1738.12	38.272
SK14_40C_78	477	2617.02	80.8475	0.05	0.00232594	0.0841	0.00343935	0.01231	0.000350877	0.048181	78.6288	2.23952	81.9923	3.24463	194.993	92.9357	96.193	78.6288	2.23952
SK14_40C_80	325.6	3840	5.2601	0.10623	0.00221044	4.254	0.101309	0.29	0.00667308	0.85562	1629.75	36.2621	1684.51	35.4415	1735.7	36.4165	97.4485	1735.7	36.4165
SK14_40C_81	199.5	-1500	2.991	0.0481	0.00221933	0.0866	0.00435888	0.01305	0.000361415	0.17785	83.5372	2.31247	84.3312	4.06753	104.191	85.3624	99.1111	83.5372	2.31247
SK14_40C_82	531	841.579	17.6412	0.0496	0.00196826	0.1022	0.00371321	0.01504	0.000361221	0.22721	96.0288	2.31789	98.8051	3.57737	176.291	74.9044	97.396	96.0288	2.31789
SK14_40C_83	112.6	324.457	1.55525	0.0459	0.00294665	0.082	0.0053572	0.01296	0.00036713	0.014939	83.196	2.38166	80.0235	5.06683	-7.63342	-41.9841	103.73	83.196	2.38166
SK14_40C_84	1604	-2554.74	144.505	0.04834	0.00126127	0.0707	0.00213527	0.0106	0.000254055	0.67695	67.8885	1.63926	69.3635	2.04258	115.942	38.3814	97.9944	67.8885	1.63926
SK14_40C_85	128.2	-4905.06	1.88529	0.1021	0.0024207	4.076	0.128244	0.2871	0.00795114	0.85357	1622.74	42.8161	1649.51	38.5888	1662.65	40.9809	98.6364	1662.65	40.9809
SK14_40C_86	743	-1938.57	8.23725	0.0499	0.00156077	0.1202	0.00339694	0.0175	0.000424382	0.4243	111.603	2.68777	115.253	3.18713	190.338	55.6883	97.0354	111.603	2.68777
SK14_40C_87	183.8	-411.727	1.81441	0.0463	0.00275998	0.0739	0.00435827	0.01163	0.000320161	0.10403	74.6532	2.04873	72.3936	4.07109	13.2704	48.6588	102.964	74.6532	2.04873
SK14_40C_90	271.6	64766.7	1.67241	0.11454	0.00234055	5.18	0.140563	0.3286	0.00819763	0.96144	1824.97	43.6397	1849.34	39.9076	1872.66	38.1969	99.0406	1872.66	38.1969
SK14_40C_91	128.9	646.25	1.28004	0.0881	0.00202599	2.216	0.0638769	0.1827	0.00479184	0.83048	1064.2	27.0661	1186.11	28.0674	1384.67	35.3848	91.1981	1384.67	35.3848
SK14_40C_93	794	18022.7	0.632166	0.08885	0.00181929	2.811	0.0701761	0.2297	0.00571532	0.94786	1327.55	32.0362	1358.47	29.3071	1400.93	29.2799	98.1195	1400.93	29.2799
SK14_40C_94	96.4	277.358	1.85029	0.0521	0.00374777	0.1019	0.00757914	0.01401	0.000464125	0.21336	89.1974	2.90058	98.5287	6.99218	289.801	145.017	91.0268	89.1974	2.90058
SK14_40C_95	149.4	1437.14	2.2568	0.10822	0.00223075	4.67	0.136834	0.3146	0.00876352	0.9693	1762.38	46.2793	1761.88	40.0228	1769.67	36.5698	100.081	1769.67	36.5698
SK14_40C_96	829	6750	7.12199	0.08948	0.00181977	2.89	0.0708649	0.2343	0.00556405	0.97119	1352.3	31.3962	1379.31	29.6993	1414.45	29.1665	98.3825	1414.45	29.1665
SK14_40C_97	1141	1422.77	5.52542	0.0491	0.00171006	0.0811	0.0028967	0.01202	0.000339694	0.46055	76.8721	2.14622	79.1786	2.79192	152.609	62.0725	97.2787	76.8721	2.14622
SK14_40C_98	70.4	-233.273	4.60131	0.0506	0.00441748	0.122	0.00922841	0.01752	0.000618773	-0.18693	111.63	3.89319	116.884	8.34663	222.65	180.295	95.7904	111.63	3.89319
SK14_40C_99	352	8011.11	5.42373	0.08884	0.00185416	2.44	0.067063	0.1985	0.00485808	0.91744	1152.14	27.3912	1254.48	28.7338	1400.71	30.0985	93.0473	1400.71	30.0985
SK14_40C_102	104.2	510.606	3.68198	0.0465	0.0035249	0.1013	0.00747962	0.01593	0.000444529	0.12569	102.083	2.86056	97.9756	6.89611	23.6239	82.6851	103.987	102.083	2.86056
SK14_40C_103	282.3	198.25	3.80972	0.0499	0.00214616	0.0934	0.00459667	0.01365	0.000327	0.40167	87.1604	2.11445	90.6657	4.2996	190.338	100.37	96.3963	87.1604	2.11445
SK14_40C_104	194.6	-263.5	3.14378	0.0506	0.00288343	0.0923	0.00570681	0.01309	0.000376084	0.28697	83.5254	2.37799	89.6437	5.31928	222.65	111.414	93.5214	83.5254	2.37799
SK14_40C_105	346	-1145	2.50725	0.0509	0.00242411	0.0895	0.00521671	0.01279	0.000371932	0.52226	81.5879	2.35173	87.0375	4.92516	236.304	99.4436	94.1282	81.5879	2.35173
SK14_40C_106	1248	2178.57	1.17958	0.0481	0.00146132	0.0771	0.00260533	0.01174	0.000302045	0.53652	75.1842	1.92366	75.4148	2.5053	104.191	55.9727	99.7684	75.1842	1.92366
SK14_40C_107	1101	-35800	0.854814	0.04838	0.00133516	0.1045	0.00349401	0.01576	0.000384384	0.6991	100.758	2.45343	100.922	3.29196	117.892	43.3921	99.8826	100.758	2.45343
SK14_40C_108	369	5886.67	8.54167	0.08708	0.0018039	2.773	0.0635359	0.2325	0.00537703	0.87802	1346.42	30.3476	1348.3	28.4557	1362.27	29.0232	99.9474	1362.27	29.0232
SK14_40C_109	156.6	-1536.67	1.43934	0.10607	0.00227436	4.213	0.122559	0.2882	0.00832008	0.93445	1620.11	44.0094	1676.56	37.5969	1732.94	37.3793	97.3739	1732.94	37.3793
SK14_40C_110	468	965	32.0548	0.0465	0.00202606	0.0905	0.00411899	0.01396	0.000355461	0.23776	89.5174	2.27387	87.969	3.83061	23.6239	82.1715	101.592	89.5174	2.27387
SK14_40C_112	205.5	2580	2.05295	0.10537	0.00222062	4.472	0.115449	0.3081	0.0081933	0.90947	1732.8	43.9495	1725.79	37.2494	1720.78	36.4495	100.322	1720.78	36.4495
SK14_40C_113	274	2380	5.73222	0.0947	0.00210562	3.41	0.138026	0.2608	0.008026	0.95806	1491.15	42.9737	1506.7	41.1562	1522.11	35.3664	99.1526	1522.11	35.3664
SK14_40C_114	105.1	-6764.29	0.831487	0.0905	0.00211804	2.826	0.0899695	0.2264	0.00674558	0.89596	1306.16	36.7337	1362.46	33.223	1436.1	36.8072	96.5608	1436.1	36.8072
SK14_40C_115	160.3	3068.75	1.58556	0.1015	0.00218936	4.421	0.109741	0.3142	0.00755835	0.88512	1776.56	41.3677	1716.28	36.3634	1651.73	36.2833	102.625	1651.73	36.2833
SK14_40C_117	878	728.333	3.80416	0.047	0.00137244	0.0845	0.00269557	0.01294	0.000321057	0.5109	82.9521	2.04798	82.3669	2.59047	49.2271	40.6027	100.625	82.9521	2.04798
SK14_40C_118	288.5	3354	4.20554	0.10435	0.00223868	4.351	0.126635	0.3012	0.008432	0.95112	1696.52	44.6294	1703.09	38.5307	1702.89	36.8226	99.6578	1702.89	36.8226
SK14_40C_120	301.2	-8064.71	6.24896	0.0877	0.00187057	2.859	0.0800347	0.2366	0.00613203	0.94828	1368.43	33.8926	1371.18	31.2588	1375.92	30.8792	99.8407	1375.92	30.8792
SK14_40C_121	469	-203.167	1.63415	0.0485	0.00222281	0.0912	0.00485561	0.0134	0.000417401	0.56267	85.724	2.63294	88.6206	4.47183	123.73	87.9751	96.8266	85.724	2.63294
SK14_40C_123	892	20579.2	6.62212	0.08729	0.00183039	2.609	0.0676147	0.2163	0.00538092	0.93781	1254.77	30.257	1303.17	28.694	1366.9	29.8485	96.8631	1366.9	29.8485
SK14_40C_124	443.2	3030	5.15949	0.08721	0.00180642	2.953	0.0827773	0.244	0.0067063	0.94958	1411.06	37.0914	1395.62	31.6907	1365.14	29.0768	100.848	1365.14	29.0768
SK14_40C_125	92.4	-623.125	2.22651	0.061	0.00185699	0.912	0.0377054	0.1096	0.00332489	0.67415	671.183	20.1492	658.12	22.3239	639.234	51.7785	101.87	671.183	20.1492
SK14_40C_127	593.6	-8363.16	1.74076	0.048	0.00146	0.0891	0.00275418	0.01357	0.000349368	0.50052	86.8619	2.23076	86.6646	2.57126	99.2691	49.6742	100.26	86.8619	2.23076
SK14_40C_128	431	112.111	8.56859	0.0493	0.00296853	0.081	0.00440845	0.01199	0.000368652	0.40785	76.6614	2.36024	79.0847	4.20783	162.123	129.739	97.1526	76.6614	2.36024
SK14_40C_130	113.4	-4735.71	1.47464	0.0989	0.00221641	4.02	0.128313	0.295	0.00900278	0.92604	1674.22	47.8397	1638.25	38.9258	1603.48	37.7982	101.722	1603.48	37.7982
SK14_40C_131	241	-66300	2.68673	0.05294	0.00144273	0.2071	0.00729083	0.02854	0.000828138	0.71656	180.66	5.16078	191.116	6.294	326.226	42.9183	94.9183	180.66	5.16078
SK14_40C_133	365.2	177.8	1.60457	0.0475	0.00221416	0.0819	0.004138	0.01247	0.000390129	0.50526	79.9008	2.48269	79.9297	3.85297	74.4384	80.1058	99.95	79.9008	2.48269
SK14_40C_134	456	9065.22	10.4348	0.08775	0.00185473	2.851	0.0849722	0.238	0.00683137	0.9509	1376.23	37.866	1369.07	32.2366	1377.02	30.4545	100.527	1377.02	30.4545
SK14_40C_135	407	636	2.05763	0.0468	0.00220819	0.0761	0.00418646	0.01218	0.000335024	0.55792	78.1197	2.16748	74.4716	3.99184	39.0335	61.4465	104.796	78.1197	2.16748
SK14_40C_136	864	-65300	5.24272	0.05729	0.00120102	0.6209	0.0158813	0.0796	0.00193506	0.92528	493.589	11.9871	490.411	11.6043	502.714	17.2524	100.678	493.589	11.9871
SK14_40C_138	192.6	8650	0.749125	0.10363	0.00220074	3.926	0.110677	0.2773	0.00726967	0.90504	1564.85	39.3275	1619.06	36.123	1690.13	36.2165	97.4488	1690.13	36.2165
SK14_40C_139	65.9	359.75	2.25685	0.0489	0.00421503	0.148	0.0113913	0.0228	0.00067671	-0.14758	145.337	4.25017	140.144	10.3126	143.039	187.073	103.699	145.337	4.25017
SK14_40C_140	110.9	793.333	2.22244	0.10085	0.00223381	3.133	0.100833	0.2262	0.00704461	0.94702	1287.28	37.6202	1440.83	34.5227	1639.81	37.4154	91.2356	1639.81	37.4154
SK14_40C_141	139.4	9175	1.91747	0.1099	0.00241479	4.046	0.107652	0.2712	0.00724291	0.87686	1518.02	38.433	1643.49	35.7288	1797.75	39.7703	94.122	1797.75	39.7703
SK14_40C_142	99.1	372	1.69983	0.0484	0.0024954	0.1305	0.00803568	0.01952	0.000474671	-0.074459	124.64	3.01761	124.547	7.24942	118.867	97.1037	100.06	124.64	3.01761
SK14_40C_143	319.1	8477.06	2.17371	0.10362	0.00213423	4.215	0.123315	0.2968	0.00887672	0.97793	1673.56	46.9836	1676.94	38.5298	1689.95	35.0289	99.9091	1689.95	35.0289
SK14_40C_144	732	25457.4	3.00493	0.08842	0.00181307	2.761	0.0751681	0.2287	0.00620979	0.97675	1322.67	34.3499	1345.06	30.3313	1391.63	29.0411	98.7078	1391.63	29.0411
SK14_40C_145	130.7	-4496.45	2.00768	0.088	0.00202425	2.934	0.0790718	0.2431	0.00617082	0.7924	1404.52	34.5038	1390.73	30.7054	1382.48	35.3489	100.868	1382.48	35.3489
SK14_40C_147	109.6	-11800	1.89948	0.10989	0.00235644	4.826	0.135429	0.3213	0.00872373	0.89269	1795.85	46.1615	1789.44	39.1787	1797.58	38.583	100.371	1797.58	38.583
SK14_40C_150	91.1	1580	1.66545	0.104	0.00245283	3.64	0.131908	0.2511	0.00961564	0.9392	1419.1	52.3178	1558.32	39.9777	1696.7	40.9994	92.6731	1696.7	40.9994
SK14_40C_152	67.2	60.5	4	0.052	0.0025242	0.182	0.0106419	0.02581	0.000943696	0.70618	163.717	5.96443	169.78	9.27352	285.41	98.5826	96.7552	163.717	5.96443
SK14_40C_153	352	3021.67	9.3617	0.08816	0.00190454	2.946	0.0985524	0.245	0.00759276	0.95461	1414.94	41.2864	1393.82	34.3156	1385.97	32.0056	101.35	1385.97	32.0056
SK14_40C_154	162.8	5090	2.81174	0.10406	0.00218034	4.324	0.11126	0.305	0.00758024	0.9269	1718.51	40.8255	1697.95	36.3648	1697.76	36.0151	101.066	1697.76	36.0151
SK14_40C_155	82.4	48.96	1.8434	0.0506	0.00461239	0.0992	0.0084366	0.01429	0.000451865	-0.0223	91.1463	2.85056	96.0376	7.84953	222.65	169.272	95.2411	91.1463	2.85056
SK14_40C_156	620	-1790	5.67246	0.0481	0.00195332	0.0932	0.00450383	0.0144	0.000453259	0.55647	92.1378	2.86866	90.4799	4.21191	104.191	73.7492	101.864	92.1378	2.86866
SK14_40C_157	1509	3210	3.81253	0.04724	0.00121254	0.0876	0.00281238	0.01358	0.000382971	0.71854	87.0098	2.43425	85.2652	2.70453	61.3767	39.8599	101.98	87.0098	2.43425
SK14_40C_158	147.3	296.143	1.57372	0.0494	0.00306368	0.0926	0.0058983	0.01384	0.000400897	0.2321	88.4244	2.52086	89.9225	5.72471	166.86	125.189	98.5366	88.4244	2.52086
SK14_40C_159	233.9	606.429	7.47284	0.0489	0.00196125	0.1196	0.00518475	0.01808	0.000469845	0.50009	115.427	2.9891	114.709	4.78604	143.039	76.7554	100.698	115.427	2.9891
SK14_40C_160	416.1	-9465	1.17542	0.08827	0.00180583	2.757	0.0705437	0.2273	0.00612177	0.95555	1315.06	34.2364	1343.98	29.4366	1388.37	28.9531	98.2404	1388.37	28.9531
SK14-43B: Red Mountain
SK14_43B_1	144.8	-5720	1.9594	0.10043	0.00216205	3.891	0.1067	0.2826	0.00716276	0.91649	1601.24	50.334	1611.82	47.9726	1632.06	48.5378	99.5426	1632.06	48.5378
SK14_43B_2	990	2628.12	2.91605	0.04797	0.00132923	0.0999	0.00304664	0.01501	0.000327139	0.60662	96.0373	2.84628	96.684	3.44772	97.7898	42.9968	99.3356	96.0373	2.84628
SK14_43B_5	99.3	1112.5	4.33624	0.109	0.0024418	4.868	0.123511	0.3223	0.00758623	0.84011	1803.7	54.8076	1796.73	52.457	1782.77	53.54	100.235	1782.77	53.54
SK14_43B_6	164.2	11983.3	9.60234	0.11289	0.00237911	4.934	0.112972	0.316	0.00708395	0.85659	1758.77	52.2243	1808.09	51.9796	1846.45	53.5871	97.9024	1846.45	53.5871
SK14_43B_7	336.4	-18085.7	1.35372	0.0495	0.00163404	0.0935	0.003122	0.01367	0.000302733	0.28174	87.3321	2.61485	90.7586	3.44599	171.582	60.8128	96.4379	87.3321	2.61485
SK14_43B_9	1236	1290.52	2.40467	0.04869	0.00128604	0.0846	0.00226116	0.01253	0.000287055	0.44209	80.1621	2.43893	82.4605	2.71991	132.93	40.4569	97.3456	80.1621	2.43893
SK14_43B_11	297	29320	2.94059	0.1032	0.00216095	3.918	0.0940441	0.2745	0.00651077	0.87822	1550.2	47.3243	1617.41	47.0517	1682.45	49.0775	96.6735	1682.45	49.0775
SK14_43B_12	1910	-4341.18	20.4936	0.04797	0.00122395	0.0947	0.00241604	0.014215	0.000297023	0.25729	90.9747	2.63126	91.8722	2.95148	97.7898	36.0291	99.0404	90.9747	2.63126
SK14_43B_13	195	489.333	1.23418	0.0473	0.00221245	0.0925	0.00505099	0.01411	0.000383715	0.57039	90.3828	3.01661	89.8296	5.08215	64.4002	81.2206	100.549	90.3828	3.01661
SK14_43B_14	3107	1827.14	2.26128	0.05003	0.00117188	0.1074	0.00267841	0.01546	0.000335417	0.54798	98.6427	2.90191	103.584	3.29136	196.387	28.7411	95.4769	98.6427	2.90191
SK14_43B_15	772	264	14.8748	0.04827	0.00116944	0.0866	0.00210709	0.01288	0.000276329	0.39781	82.4358	2.42311	84.3312	2.62629	112.523	32.3066	97.8282	82.4358	2.42311
SK14_43B_16	271.4	-1263.16	2.93723	0.0482	0.00213056	0.0892	0.00375135	0.01333	0.000310927	-0.0090741	85.3108	2.61156	86.7579	3.95249	109.097	74.4869	98.3922	85.3108	2.61156
SK14_43B_19	166.5	14406.6	1.99401	0.10576	0.00225099	4.344	0.0978424	0.2964	0.0063954	0.66987	1666.44	48.626	1701.76	48.8954	1727.57	50.3108	98.3356	1727.57	50.3108
SK14_43B_21	167.8	-29000	1.60115	0.1138	0.00236158	5.165	0.116103	0.326	0.00713585	0.84615	1812.32	53.1239	1846.87	52.957	1860.96	53.4496	98.4891	1860.96	53.4496
SK14_43B_22	248.1	4120	3.31684	0.10895	0.00225746	4.709	0.103951	0.3111	0.00656683	0.78347	1741.02	50.4502	1768.84	50.6505	1781.93	51.3639	98.7153	1781.93	51.3639
SK14_43B_23	1524	2761.11	491.613	0.04831	0.00138335	0.0815	0.00250338	0.0123	0.000283048	0.54914	78.7347	2.40166	79.5542	2.82082	114.478	53.447	99.061	78.7347	2.40166
SK14_43B_24	413.9	-358.4	2.13791	0.0496	0.00196826	0.1108	0.00528684	0.01626	0.000392626	0.37069	103.777	3.25073	106.697	5.33538	176.291	79.739	97.4495	103.777	3.25073
SK14_43B_25	654.9	534556	0.860578	0.10123	0.00205463	3.859	0.083939	0.2746	0.0058798	0.93159	1554.89	45.0887	1605.15	45.907	1646.79	47.0159	97.4431	1646.79	47.0159
SK14_43B_26	183.2	-16800	2.08182	0.0488	0.00249852	0.0933	0.00450466	0.01383	0.000310012	-0.32892	88.4285	2.65772	90.5728	4.80311	138.233	94.8138	97.7589	88.4285	2.65772
SK14_43B_27	1787	3438.89	26.6319	0.04906	0.00125346	0.088	0.00231249	0.0129	0.000276702	0.50863	82.4801	2.4188	85.6386	2.79802	150.699	37.9152	96.4833	82.4801	2.4188
SK14_43B_28	179	-11992.3	1.62285	0.1089	0.00244002	4.868	0.112818	0.3231	0.00721092	0.68264	1808.46	53.313	1796.73	51.7749	1781.1	53.4965	100.452	1781.1	53.4965
SK14_43B_29	451	25800	3.19631	0.1096	0.00234036	4.82	0.111485	0.3163	0.00722968	0.88893	1768.53	52.8206	1788.39	51.5241	1792.77	52.606	99.0628	1792.77	52.606
SK14_43B_30	59.8	197.475	1.73837	0.0454	0.00459069	0.076	0.00765248	0.012	0.000361248	0.098136	77.1069	2.76802	74.3773	7.41219	-34.1402	#DIV/0!	103.387	77.1069	2.76802
SK14_43B_31	271	-27087.5	4.62457	0.10914	0.0022486	4.439	0.094371	0.2952	0.00641149	0.73745	1652.07	48.4692	1719.65	49.0077	1785.11	51.3042	96.9653	1785.11	51.3042
SK14_43B_32	185.1	269.231	4.14094	0.0509	0.00206793	0.0968	0.0045341	0.01393	0.000326371	0.13814	88.8266	2.74081	93.8182	4.63542	236.304	80.7648	95.055	88.8266	2.74081
SK14_43B_34	371.9	5756	2.75686	0.10384	0.00214586	4.066	0.0901884	0.2843	0.00625225	0.89701	1603.32	47.1537	1647.51	47.247	1693.86	48.862	97.9041	1693.86	48.862
SK14_43B_35	168.6	-2171.67	3	0.10426	0.00225942	4.114	0.0942656	0.2856	0.00659674	0.76833	1609.63	48.5634	1657.09	47.7449	1701.3	50.4045	97.732	1701.3	50.4045
SK14_43B_36	158.5	-2254	1.72846	0.10308	0.00228698	3.681	0.0995435	0.2603	0.0065048	0.82898	1471.73	46.0709	1567.26	46.4876	1680.31	50.8219	95.1585	1680.31	50.8219
SK14_43B_37	176.6	49642.9	3.24037	0.1044	0.00218983	4.158	0.0991544	0.2891	0.00660844	0.77675	1628.81	48.7429	1665.79	48.3838	1703.77	49.6611	98.2738	1703.77	49.6611
SK14_43B_38	192.8	13422.2	2.97531	0.08813	0.00194401	2.78	0.0641511	0.2299	0.0049751	0.56429	1329.93	38.9149	1350.18	39.1455	1385.32	43.1212	98.7998	1385.32	43.1212
SK14_43B_39	241.9	12337.5	1.94141	0.0471	0.00194354	0.0976	0.00366337	0.015	0.000390512	0.030654	96.0799	3.15511	94.5585	3.87334	54.3003	63.6517	101.501	96.0799	3.15511
SK14_43B_40	177.3	855.844	1.54983	0.0502	0.00232766	0.0937	0.00496708	0.01375	0.000328672	0.29167	87.7624	2.75573	90.9442	4.72076	204.264	120.294	96.8003	87.7624	2.75573
SK14_43B_41	3665	3313.89	6.23299	0.0508	0.00149742	0.0846	0.00285532	0.012063	0.000254494	0.63736	76.9787	2.23802	82.4605	3.13947	231.765	53.0802	93.7392	76.9787	2.23802
SK14_43B_42	786	-46916.7	97.037	0.10414	0.00212473	3.754	0.0820122	0.2628	0.00558888	0.92752	1483.45	43.0135	1582.97	45.3172	1699.18	48.6417	95.0209	1699.18	48.6417
SK14_43B_43	342	-250	3.6383	0.0483	0.00178414	0.1084	0.00411706	0.01629	0.000358672	0.20784	104.139	3.09175	104.501	4.3562	113.989	66.8991	99.6796	104.139	3.09175
SK14_43B_45	226.8	6895.24	6.31755	0.08872	0.00188629	2.906	0.0636705	0.2379	0.00498884	0.60393	1373.92	39.633	1383.47	39.6835	1398.12	41.9503	99.4432	1398.12	41.9503
SK14_43B_46	228.4	-427250	2.45591	0.10346	0.00215724	3.993	0.092664	0.2809	0.00614914	0.85084	1585.22	46.659	1632.77	47.1694	1687.1	48.97	97.7413	1687.1	48.97
SK14_43B_47	3360	2495.35	1.16667	0.05236	0.00128807	0.0869	0.0021704	0.012072	0.000249027	0.5631	76.8823	2.20883	84.6115	2.67725	301.163	34.3129	91.4239	76.8823	2.20883
SK14_43B_48	219.2	-2396.67	1.34149	0.1212	0.00250453	6.183	0.136586	0.3703	0.00837012	0.86777	2042.63	60.5442	2002.05	57.2172	1973.97	56.5852	101.437	1973.97	56.5852
SK14_43B_53	291	-8885	2.86136	0.08927	0.00193268	2.892	0.0681283	0.2348	0.00518579	0.75686	1355.49	40.1639	1379.83	40.1205	1409.96	42.9694	98.5345	1409.96	42.9694
SK14_43B_54	364	1780.82	1.56223	0.0488	0.00170663	0.0927	0.00327526	0.01375	0.000313249	0.093945	87.9193	2.66886	90.0154	3.56852	138.233	66.7087	97.7992	87.9193	2.66886
SK14_43B_55	88.3	-705.122	2.62798	0.0491	0.00296721	0.0839	0.0048965	0.01236	0.000324358	0.12792	79.0376	2.63619	81.805	4.88323	152.609	122.163	96.8025	79.0376	2.63619
SK14_43B_56	181.9	5081.48	2.99178	0.10085	0.00212224	4	0.0877268	0.2864	0.00613596	0.71263	1621.58	47.162	1634.2	46.7186	1639.81	47.9096	99.3464	1639.81	47.9096
SK14_43B_57	407.7	20792.9	2.12898	0.10283	0.00212132	3.872	0.0810738	0.2729	0.00561068	0.61261	1542.09	44.1349	1607.86	45.7624	1675.82	48.3032	96.7436	1675.82	48.3032
SK14_43B_58	490.3	1064.29	204.292	0.0507	0.00181058	0.081	0.00314871	0.01167	0.000262442	0.31478	74.4901	2.23212	79.0847	3.35426	227.214	68.8565	94.5747	74.4901	2.23212
SK14_43B_59	221.9	3700	2.55645	0.08974	0.0019123	2.387	0.0525653	0.1912	0.00410767	0.75205	1109.75	32.4333	1238.71	35.6711	1420	42.5338	91.0521	1420	42.5338
SK14_43B_60	224.8	8760	2.4488	0.10597	0.00223516	4.339	0.095978	0.2967	0.00636415	0.76097	1667.63	48.4225	1700.81	48.7185	1731.21	50.4152	98.4783	1731.21	50.4152
SK14_43B_61	240.3	1586.99	5.19006	0.049	0.00147323	0.208	0.00642772	0.0308	0.000657538	0.20676	195.805	5.73814	191.873	6.80257	147.831	53.4634	101.918	195.805	5.73814
SK14_43B_62	673	-35666.7	8.07923	0.11108	0.002275	4.665	0.0986351	0.3048	0.00630248	0.73386	1700.85	48.7408	1760.99	50.1334	1817.16	52.0007	97.3924	1817.16	52.0007
SK14_43B_63	1406	10000	1.85	0.06256	0.00129923	0.8684	0.0195156	0.1006	0.00224681	0.86107	616.234	18.3639	634.698	18.5828	693.308	22.9928	97.3572	616.234	18.3639
SK14_43B_64	1012	-45250	0.892416	0.10498	0.00217824	3.936	0.0838918	0.2734	0.00567001	0.75507	1540.38	44.2286	1621.12	46.243	1713.96	49.4988	96.109	1713.96	49.4988
SK14_43B_65	160.2	248.889	1.90488	0.0497	0.00278353	0.109	0.00647784	0.01596	0.000387671	0.42991	101.859	3.20171	105.05	6.34652	180.987	110.722	97.1653	101.859	3.20171
SK14_43B_66	1605	-3750	1.46042	0.04833	0.00112726	0.1059	0.00253888	0.015932	0.000328529	0.26016	101.859	2.92577	102.208	3.16977	115.454	28.5445	99.6935	101.859	2.92577
SK14_43B_67	176.7	8133.33	2.46788	0.10617	0.0022587	4.566	0.101805	0.3144	0.00676675	0.80206	1766.27	51.3855	1743.08	49.9629	1734.67	50.7581	101.104	1734.67	50.7581
SK14_43B_68	1994	-1374	5.97901	0.04784	0.00120957	0.0853	0.00202989	0.012951	0.000270509	-0.021444	82.9336	2.39633	83.1156	2.55479	91.364	35.2349	99.8025	82.9336	2.39633
SK14_43B_69	308.9	14155.6	1.58086	0.05667	0.00132174	0.6064	0.0148101	0.07847	0.00167315	0.55059	487.115	14.2155	481.287	14.6452	478.714	29.3973	101.184	487.115	14.2155
SK14_43B_71	102.4	485.057	3.07508	0.0518	0.0034588	0.1115	0.00792041	0.01541	0.000367406	0.2559	98.1032	3.06144	107.337	7.54641	276.591	138.517	91.8434	98.1032	3.06144
SK14_43B_72	89.2	145.958	1.87789	0.0502	0.00687372	0.101	0.014145	0.01478	0.000374539	-0.0057468	94.3046	3.05788	97.699	12.3983	204.264	295.105	96.8083	94.3046	3.05788
SK14_43B_74	403	12767	6.37658	0.08775	0.00184524	2.974	0.0613422	0.2476	0.0051742	0.53789	1430.37	41.1503	1401	39.808	1377.02	41.0602	101.791	1377.02	41.0602
SK14_43B_75	853	46809.1	28.0592	0.08816	0.00178375	2.78	0.0578564	0.2303	0.00475975	0.86379	1332.13	38.1985	1350.18	38.4191	1385.97	39.628	98.9551	1385.97	39.628
SK14_43B_76	370.6	17400	1.60433	0.10417	0.00213576	4.117	0.085492	0.2875	0.00587388	0.66094	1620.41	46.2191	1657.68	47.1018	1699.71	48.7694	98.2712	1699.71	48.7694
SK14_43B_77	551	73833.3	0.584305	0.09561	0.00198429	3.273	0.069721	0.2482	0.00521549	0.73298	1418.93	40.9311	1474.66	42.111	1540.12	44.6944	96.9165	1540.12	44.6944
SK14_43B_79	405.7	3465.85	7.80192	0.0479	0.00138483	0.0889	0.0027516	0.01344	0.000279611	0.36202	86.0445	2.48253	86.4782	3.09693	94.3329	46.7355	99.5196	86.0445	2.48253
SK14_43B_80	185	10976.9	1.57313	0.10656	0.00217415	4.406	0.0924615	0.2997	0.00617884	0.68881	1683.01	48.1853	1713.47	48.7532	1741.39	49.8067	98.6199	1741.39	49.8067
SK14_43B_82	330.8	3350	1.97375	0.08722	0.00187225	2.397	0.053612	0.1984	0.00409207	0.65507	1154.02	33.0905	1241.7	35.8314	1365.36	41.4305	93.9611	1365.36	41.4305
SK14_43B_83	81.1	207.933	5.5931	0.0438	0.00351104	0.0933	0.00772865	0.0151	0.00041183	0.12704	97.1229	3.2896	90.5728	7.46661	-121.924	-609.629	106.669	97.1229	3.2896
SK14_43B_84	82.5	215	0.983313	0.0477	0.00460001	0.088	0.0085824	0.01335	0.000365772	-0.04994	85.4926	2.89944	85.6386	8.50365	84.4158	168.848	99.8268	85.4926	2.89944
SK14_43B_85	77.1	-1370	2.12397	0.1015	0.00230887	3.894	0.0965106	0.2752	0.00686324	0.7757	1557.67	48.7527	1612.44	47.4176	1651.73	50.8272	97.1909	1651.73	50.8272
SK14_43B_86	330.2	-4334	2.2867	0.08831	0.00187186	3.109	0.0755999	0.2537	0.00565645	0.84345	1463.73	43.4091	1434.92	41.7993	1389.24	41.0756	101.576	1389.24	41.0756
SK14_43B_88	64.1	3166.67	1.69577	0.1055	0.00270963	4.493	0.132226	0.3069	0.00858342	0.78709	1725.76	56.7833	1729.68	52.1314	1723.05	57.7692	99.7546	1723.05	57.7692
SK14_43B_89	555	1213.12	1.44156	0.0489	0.00187523	0.0911	0.00334061	0.01336	0.000306424	0.087302	85.4257	2.59579	88.5276	3.61025	143.039	73.175	96.6409	85.4257	2.59579
SK14_43B_90	2077	63307.7	1.1571	0.11788	0.00243275	4.944	0.102241	0.3017	0.00619428	0.65652	1667.84	47.6432	1809.8	51.3777	1924.33	55.184	93.9182	1924.33	55.184
SK14_43B_91	2140	70523.8	8.32685	0.10691	0.00215778	3.87	0.080745	0.2601	0.00541394	0.91483	1463.04	42.0485	1607.45	45.7078	1747.39	49.6661	92.7156	1747.39	49.6661
SK14_43B_93	641	30985.9	1.89086	0.09898	0.00205728	3.586	0.081638	0.2601	0.00547273	0.92071	1478.75	42.7068	1546.44	44.5969	1604.99	46.7096	96.3734	1604.99	46.7096
SK14_43B_94	126.5	740.541	2.5504	0.0518	0.00151106	0.2358	0.00702002	0.03274	0.000728809	0.11689	207.272	6.19297	214.975	7.3908	276.591	51.2583	96.6037	207.272	6.19297
SK14_43B_96	572	-156609	11.4859	0.08876	0.00180381	2.934	0.0608222	0.23801	0.00485212	0.72013	1374.46	39.1824	1390.73	39.5593	1398.99	40.1494	98.9658	1398.99	40.1494
SK14_43B_97	213.5	6053.57	4.31313	0.10432	0.00218235	4.345	0.094449	0.3002	0.00618854	0.69602	1690.99	48.4273	1701.95	48.6591	1702.36	49.391	99.4333	1702.36	49.391
SK14_43B_98	190.9	1129.51	1.86426	0.052	0.00243343	0.0986	0.00491312	0.01364	0.000306627	0.29455	86.8634	2.60159	95.4832	4.99274	285.41	97.1897	91.4661	86.8634	2.60159
SK14_43B_99	539	208.625	385	0.0506	0.00172747	0.0813	0.00298226	0.01166	0.000262264	0.31562	74.436	2.23743	79.3664	3.28548	222.65	66.2702	94.1587	74.436	2.23743
SK14_43B_100	350	-55263.2	2.27273	0.08805	0.00182264	2.753	0.0582461	0.22503	0.00458971	0.62816	1302.66	37.1407	1342.9	38.3373	1383.58	40.3919	97.4308	1383.58	40.3919
SK14_43B_101	64.5	161.714	2.01562	0.0448	0.00596765	0.083	0.0111245	0.01334	0.00033344	0.010296	85.7441	2.75414	80.9615	10.9715	-66.5181	-554.321	105.515	85.7441	2.75414
SK14_43B_103	171.7	-1480	2.19846	0.10583	0.00215787	4.272	0.0912359	0.2911	0.00615595	0.82602	1636.76	47.3492	1687.98	48.1443	1728.78	49.4392	97.5735	1728.78	49.4392
SK14_43B_104	98.8	88.325	1.96421	0.0478	0.00382151	0.089	0.0071259	0.01341	0.000359904	-0.079799	85.8642	2.85416	86.5714	6.95798	89.3818	134.097	99.192	85.8642	2.85416
SK14_43B_105	517	4388.89	10.8386	0.10329	0.00211424	4.089	0.0837375	0.2864	0.00583266	0.4892	1616.22	46.0169	1652.11	46.875	1684.06	48.2833	98.2691	1684.06	48.2833
SK14_43B_106	485	30983.6	9.77823	0.10457	0.00214803	4.231	0.0891322	0.292	0.0060824	0.66837	1644.6	47.2978	1680.06	47.8138	1706.77	49.0524	98.3013	1706.77	49.0524
SK14_43B_107	1420	1814.81	45.0794	0.0486	0.00146792	0.0866	0.00257096	0.012862	0.000265082	0.20767	82.2864	2.36317	84.3312	2.98861	128.579	52.586	97.6923	82.2864	2.36317
SK14_43B_108	182.6	-1252.22	1.23713	0.09555	0.00210388	3.042	0.0717322	0.231	0.00488921	0.67077	1323.12	38.3532	1418.23	41.2236	1538.94	46.7335	94.4658	1538.94	46.7335
SK14_43B_110	193	-6000	4.76543	0.0493	0.00196525	0.163	0.00630774	0.02409	0.000521662	0.20049	153.418	4.52989	153.326	6.39566	162.123	75.5927	100.083	153.418	4.52989
SK14_43B_111	1258	2110	27.8319	0.04795	0.00114196	0.0821	0.00203376	0.01223	0.000255549	0.40323	78.3244	2.26461	80.1174	2.51904	96.8029	29.0703	97.8083	78.3244	2.26461
SK14_43B_113	378.3	1013.33	3.75298	0.0465	0.00185065	0.0942	0.00354252	0.01475	0.000330946	0.025015	94.5585	2.83535	91.4083	3.81128	23.6239	43.4221	103.262	94.5585	2.83535
SK14_43B_114	1355	792.5	3.78175	0.04735	0.00123325	0.0831	0.00217307	0.012744	0.00027236	0.24652	81.6646	2.38906	81.0553	2.63596	66.9155	35.9321	100.714	81.6646	2.38906
SK14_43B_115	137.9	-1394.44	1.5778	0.051	0.00181395	0.1832	0.00686039	0.02632	0.000582749	0.46308	167.138	4.98968	170.81	6.95509	240.83	66.2193	98.0474	167.138	4.98968
SK14_43B_116	252.2	14107.1	2.32657	0.10503	0.00214826	4.076	0.0865246	0.2821	0.00578983	0.86306	1588.5	45.4038	1649.51	47.0145	1714.84	49.1423	97.1153	1714.84	49.1423
SK14_43B_117	155.9	11438	1.93424	0.10815	0.00229934	4.766	0.10457	0.3195	0.00672622	0.58161	1790.08	51.6124	1778.93	50.8718	1768.48	51.6829	100.47	1768.48	51.6829
SK14_43B_118	273	3652	1.25229	0.08952	0.00190474	2.987	0.07027	0.2437	0.0050996	0.84684	1405.09	40.5189	1404.31	40.8409	1415.31	42.4095	100.113	1415.31	42.4095
SK14_43B_119	120.6	8991.67	2.01	0.10847	0.00226468	4.817	0.109478	0.3227	0.00734194	0.81774	1807.29	53.8833	1787.87	51.3811	1773.88	51.5846	100.841	1773.88	51.5846
SK14_43B_121	125.7	-3445	2.52918	0.07758	0.00179877	2.148	0.0482655	0.2021	0.00450974	0.50204	1189.66	35.4115	1164.41	33.7124	1136.14	40.1224	101.905	1136.14	40.1224
SK14_43B_122	714	3514.29	7.36842	0.04911	0.00114066	0.173	0.00426868	0.02584	0.000561678	0.5003	164.51	4.85911	162.019	5.08344	153.086	28.5305	101.506	164.51	4.85911
SK14_43B_123	163.7	-3407.5	4.12343	0.1075	0.00222173	4.628	0.105201	0.3134	0.00671177	0.88654	1757.41	51.1341	1754.33	50.4478	1757.47	50.6084	100.176	1757.47	50.6084
SK14_43B_124	301.5	-5312.5	3.831	0.10518	0.00218477	3.854	0.0801581	0.2673	0.0056409	0.69621	1506.22	43.4976	1604.11	45.6035	1717.46	49.5964	95.1984	1717.46	49.5964
SK14_43B_125	409.8	511.786	1.2586	0.0534	0.00160643	0.0974	0.00309107	0.013329	0.000284023	0.29887	84.7395	2.47456	94.3735	3.45867	345.831	46.1151	90.4456	84.7395	2.47456
SK14_43B_126	668.1	-253444	1.65782	0.10049	0.00204729	3.589	0.075686	0.2614	0.00538721	0.77206	1482.98	42.4514	1547.1	44.0784	1633.17	46.7356	96.7617	1633.17	46.7356
SK14_43B_128	150.4	10236.4	0.957962	0.0997	0.0022307	3.899	0.0890499	0.2854	0.00598509	0.52378	1618.5	46.6935	1613.48	46.496	1618.49	49.5665	100.311	1618.49	49.5665
SK14_43B_129	187.1	110.857	1.3204	0.0475	0.00221416	0.101	0.00530004	0.01571	0.000348169	0.34339	100.553	2.99557	97.699	5.28462	74.4384	111.087	102.853	100.553	2.99557
SK14_43B_130	95.7	5378.57	3.40569	0.1047	0.00232052	4.292	0.117339	0.2998	0.00793675	0.87396	1687.87	54.3453	1691.83	50.1502	1709.05	51.5857	99.9107	1709.05	51.5857
SK14_43B_131	261.1	6530	2.47254	0.10294	0.00212844	3.964	0.0851253	0.2812	0.00590503	0.78397	1588.01	45.8575	1626.86	46.4438	1677.8	48.4167	98.1894	1677.8	48.4167
SK14_43B_132	776	15100	0.987277	0.10377	0.0021099	4.088	0.0968953	0.2884	0.00645599	0.95244	1626.31	48.0656	1651.91	47.7811	1692.62	48.355	98.8872	1692.62	48.355
SK14_43B_134	207.1	8235.29	1.42828	0.0901	0.0019798	3.051	0.070848	0.2469	0.00519075	0.79551	1422.01	41.0277	1420.48	41.1954	1427.65	43.4247	100.14	1427.65	43.4247
SK14_43B_136	211.6	17130	2.60271	0.10261	0.00212989	4.125	0.0939747	0.292	0.00627659	0.78627	1649	47.9157	1659.27	47.7678	1671.86	48.333	99.5328	1671.86	48.333
SK14_43B_137	1173	-5996.43	4.35736	0.04812	0.00123252	0.1024	0.00272659	0.015474	0.000324028	0.43619	98.9721	2.86502	98.9893	3.27544	105.173	37.1802	99.9986	98.9721	2.86502
SK14_43B_138	241.2	-2071.11	1.63525	0.10377	0.00214704	3.987	0.0892102	0.2778	0.00581026	0.73676	1567.33	45.1816	1631.55	46.7841	1692.62	48.8674	96.857	1692.62	48.8674
SK14_43B_139	537	134788	5.37538	0.10514	0.00212553	4.324	0.0908999	0.2973	0.00618425	0.89036	1672.88	48.0869	1697.95	48.295	1716.76	48.8568	98.8196	1716.76	48.8568
SK14_43B_141	842.6	-1290	0.987808	0.0482	0.00122139	0.11	0.00290689	0.01656	0.000363584	0.19604	105.87	3.13559	105.965	3.44544	109.097	35.1669	99.9179	105.87	3.13559
SK14_43B_142	815	-18111.1	1.93082	0.05395	0.00112265	0.4309	0.0091586	0.05793	0.00121324	0.58607	362.959	10.4991	363.815	10.5228	368.963	16.6695	99.7826	362.959	10.4991
SK14_43B_143	100	-153600	1.40252	0.10526	0.00224505	4.05	0.0951893	0.278	0.00613788	0.76349	1565.27	46.1054	1644.3	47.5711	1718.86	50.5943	96.1675	1718.86	50.5943
SK14_43B_144	132.9	-322	1.40635	0.0501	0.00250878	0.1823	0.00888275	0.02635	0.000575003	-0.01044	167.518	4.96941	170.038	8.49763	199.635	95.232	98.6038	167.518	4.96941
SK14_43B_145	184.6	-173571	2.00871	0.08824	0.00190227	2.914	0.067982	0.2376	0.00519533	0.6027	1373.09	40.3627	1385.55	40.2325	1387.71	42.0218	99.1813	1387.71	42.0218
SK14_43B_146	232.3	-35711.5	0.908842	0.10369	0.00215071	4.228	0.0919043	0.2948	0.00629308	0.70142	1662.22	48.2801	1679.47	48.0158	1691.2	48.8686	99.1663	1691.2	48.8686
SK14_43B_148	103.3	985	1.88504	0.09696	0.00216827	3.798	0.089855	0.2832	0.00650545	0.64291	1612.13	48.3405	1592.32	46.135	1566.44	48.21	100.951	1566.44	48.21
SK14_43B_149	958	-27540	1.47954	0.06127	0.00127719	0.8959	0.0200964	0.10457	0.00217033	0.79441	640.96	18.445	649.534	18.9372	648.726	22.4957	98.707	640.96	18.445
SK14_43B_150	501.6	1378.75	2.07016	0.0479	0.0016964	0.1073	0.00360767	0.01607	0.000343071	-0.03905	102.793	3.01029	103.493	3.98215	94.3329	60.0893	99.3022	102.793	3.01029
SK14_43B_151	151.7	229000	2.18903	0.0916	0.00196118	2.861	0.0676027	0.2232	0.00481324	0.82788	1286.35	37.6055	1371.71	39.9682	1459.11	43.9116	94.6821	1459.11	43.9116
SK14_43B_152	99.4	1642.5	2.40678	0.0482	0.00231069	0.1647	0.00846702	0.02431	0.000556139	0.22246	155.024	4.70365	154.809	8.09553	109.097	88.0974	100.019	155.024	4.70365
SK14_43B_153	480.6	35672.7	6.10673	0.10537	0.00215491	4.409	0.0919332	0.3005	0.00627376	0.73351	1690.23	48.6069	1714.03	48.7172	1720.78	49.2922	98.8189	1720.78	49.2922
SK14_43B_154	176.9	14330	6.60075	0.10516	0.00222303	4.374	0.0970399	0.2987	0.00629989	0.74229	1680.65	48.5712	1707.44	48.9357	1717.11	50.2773	98.6775	1717.11	50.2773
SK14_43B_155	80.2	254.5	3.08462	0.0491	0.00306175	0.1597	0.00964425	0.02335	0.000577658	0.13353	148.778	4.70284	150.441	9.07254	152.609	122.163	98.9051	148.778	4.70284
SK14_43B_156	352.7	18372.7	106.879	0.08846	0.00186817	2.579	0.0607001	0.2094	0.00473068	0.89254	1214.04	36.3363	1294.7	37.6858	1392.49	41.4771	94.6646	1392.49	41.4771
SK14_43B_157	232.4	11556.2	2.38359	0.11274	0.00239251	4.545	0.101429	0.2898	0.00601279	0.6698	1614.16	46.3292	1739.25	49.8722	1844.05	53.7533	94.3242	1844.05	53.7533
SK14_43B_159	76.7	-4292.86	1.02267	0.0998	0.00223249	3.977	0.120111	0.2881	0.00659095	0.86842	1633.42	48.8967	1629.51	49.4819	1620.36	50.0112	100.154	1620.36	50.0112
SK14_43B_160	2820	194000	66.3529	0.04854	0.00106177	0.0854	0.00194002	0.012706	0.000260434	0.58754	81.2988	2.32743	83.2092	2.50575	125.671	21.4099	97.8163	81.2988	2.32743
SK14_43B_161	226.2	37583.3	1.625	0.05736	0.00148313	0.5919	0.0145735	0.07362	0.00158252	0.053998	457.221	13.3961	472.08	14.4034	505.401	38.8273	97.0022	457.221	13.3961
SK14_43B_163	982	-1498000	1.02079	0.10257	0.0020863	4.026	0.0894677	0.2842	0.0060949	0.94413	1605.53	46.714	1639.46	47.0393	1671.14	47.7681	98.3542	1671.14	47.7681
SK14_43B_164	532	10825	1.77333	0.11057	0.00229135	4.599	0.0980628	0.3014	0.00645188	0.79989	1683.17	48.84	1749.09	49.8587	1808.8	52.1099	97.0934	1808.8	52.1099
SK14_43B_165	742	1160.56	2.92702	0.0475	0.00145344	0.0816	0.00273924	0.01242	0.000290177	0.62582	79.5817	2.4394	79.6481	3.08065	74.4384	49.6702	99.9036	79.5817	2.4394
SK14_43B_167	147.9	9800	2.42062	0.10586	0.00227775	4.448	0.102542	0.3041	0.00665438	0.82264	1709.22	50.3242	1721.33	49.6049	1729.3	51.1611	99.4354	1729.3	51.1611
SK14_43B_168	692	1675	13.3077	0.0488	0.00139735	0.0869	0.00272592	0.01286	0.000279735	0.43926	82.2527	2.43497	84.6115	3.05586	138.233	48.9446	97.3537	82.2527	2.43497
SK14_43B_169	338	64242.4	2.15699	0.08873	0.00182362	2.889	0.0621895	0.236	0.00505157	0.80986	1363.2	39.6127	1379.04	39.4795	1398.34	40.6071	99.0446	1398.34	40.6071
SK14_43B_170	1188	-14180	371.25	0.08967	0.00182918	2.814	0.0615828	0.2274	0.00485534	0.89656	1313.2	38.1366	1359.27	39.0085	1418.51	40.835	97.174	1418.51	40.835
SK14_43B_171	140.9	1311.43	3.18059	0.0915	0.0020854	3.152	0.0736073	0.2485	0.005609	0.60104	1428.37	42.433	1445.49	41.9073	1457.03	46.2598	98.9793	1457.03	46.2598
SK14_43B_172	45.8	2266.92	1.20844	0.0887	0.00245705	3.024	0.116012	0.2453	0.00759663	0.78176	1415.62	49.3864	1413.69	47.1733	1397.69	54.177	100.035	1397.69	54.177
SK14_43B_173	248.5	1036.84	2.85961	0.0483	0.00178414	0.1599	0.00593525	0.02371	0.000522748	-0.054078	151.208	4.50043	150.616	6.12471	113.989	62.7335	100.295	151.208	4.50043
SK15-75: Roaring Creek
SK15_75_10	256	416	2.51227	0.0505	0.0019774	0.0973	0.00418054	0.01401	0.000333035	0.52121	89.38	2.15064	94.281	3.975	218.073	76.91	95.1278	89.38	2.15064
SK15_75_100	322.7	297.571	3.73928	0.0495	0.00171467	0.0791	0.00270975	0.01146	0.00025423	0.39376	73.2669	1.62747	77.2984	2.60765	171.582	62.6711	95.0288	73.2669	1.62747
SK15_75_101	328	9883.33	2.77966	0.10619	0.0021463	4.54	0.117769	0.3076	0.00774191	0.96757	1728.04	41.5074	1738.33	37.4805	1735.01	35.1026	99.4567	1735.01	35.1026
SK15_75_102	275.3	-555000	1.29007	0.09856	0.00199701	3.869	0.0997831	0.2833	0.00705291	0.96714	1609.22	38.4382	1607.24	34.6747	1597.06	32.4999	100.045	1597.06	32.4999
SK15_75_103	99.4	727.439	2.4788	0.0501	0.00241744	0.1469	0.00722439	0.02131	0.000504526	0.52809	135.697	3.20041	139.171	6.52633	199.635	95.8267	97.671	135.697	3.20041
SK15_75_104	96.9	529.167	1.67938	0.0498	0.00306627	0.0793	0.00458316	0.01167	0.000272168	0.23975	74.5758	1.73563	77.4866	4.3874	185.669	123.835	96.5252	74.5758	1.73563
SK15_75_105	209.6	-23533.3	1.61978	0.10501	0.00215435	4.383	0.116676	0.3009	0.00782409	0.95913	1693.3	42.0705	1709.14	37.3296	1714.49	35.3277	99.2178	1714.49	35.3277
SK15_75_106	70.3	-1563.33	1.22474	0.08652	0.00195046	2.9	0.0813204	0.2402	0.0060637	0.82271	1390.88	33.7092	1381.91	31.4459	1349.83	33.6051	100.421	1349.83	33.6051
SK15_75_107	299.8	30675	1.76561	0.0469	0.00168518	0.0969	0.00365593	0.01476	0.00034575	0.35238	94.5742	2.18852	93.9108	3.45538	44.1381	49.9755	100.578	94.5742	2.18852
SK15_75_108	123.6	619.5	4.44604	0.0478	0.00186385	0.1198	0.00509812	0.01799	0.000501952	0.60235	115.016	3.18454	114.891	4.6997	89.3818	66.1295	100.043	115.016	3.18454
SK15_75_109	321	211500	3.30587	0.08736	0.0017839	2.847	0.0673659	0.2353	0.00542554	0.96167	1361.71	30.6206	1368.02	28.9962	1368.45	28.4864	99.5758	1368.45	28.4864
SK15_75_11	203.5	456	1.83499	0.0492	0.00250165	0.077	0.0041002	0.01142	0.000267893	0.2838	73.0401	1.72007	75.3205	3.90337	157.373	98.4084	97.1858	73.0401	1.72007
SK15_75_111	97.2	777.647	2.02542	0.049	0.00296655	0.0807	0.00506409	0.0121	0.000307675	0.50554	77.3915	1.95749	78.8028	4.76817	147.831	118.302	98.3892	77.3915	1.95749
SK15_75_112	238	-682	1.65393	0.0495	0.00155567	0.1767	0.00628722	0.0257	0.000651303	0.58809	163.545	4.11637	165.217	5.58326	171.582	55.2939	99.0091	163.545	4.11637
SK15_75_113	95.8	189.25	3.22559	0.0484	0.00178522	0.0942	0.00354252	0.01424	0.000399388	-0.028075	91.084	2.55935	91.4083	3.34419	118.867	96.1345	99.7168	91.084	2.55935
SK15_75_114	147.2	4972	1.1919	0.10994	0.00226899	4.62	0.151452	0.3044	0.00935274	0.97731	1701.31	48.6427	1752.89	40.8778	1798.41	37.1512	97.7296	1798.41	37.1512
SK15_75_115	53.6	-1765	1.45652	0.08761	0.00183649	2.859	0.0836095	0.235	0.00671789	0.90449	1359.58	36.9198	1371.18	31.751	1373.95	29.9847	99.232	1373.95	29.9847
SK15_75_116	144.1	-472.5	1.78342	0.047	0.00295357	0.08	0.00487032	0.01192	0.000331262	0.17561	76.4393	2.14231	78.1449	4.57755	49.2271	118.149	97.7503	76.4393	2.14231
SK15_75_117	118.7	-2668.57	1.3504	0.10068	0.00214874	3.955	0.0986803	0.2829	0.00704649	0.85433	1602.38	38.2891	1625.02	34.645	1636.68	35.6041	98.8268	1636.68	35.6041
SK15_75_118	868	60238.1	2.04717	0.09357	0.00191795	3.433	0.102422	0.2655	0.00786359	0.97443	1519.78	42.7318	1511.98	34.696	1499.45	31.1704	100.393	1499.45	31.1704
SK15_75_119	58	124.75	1.9748	0.0522	0.00270923	0.1147	0.00633028	0.01591	0.000392621	0.31375	101.218	2.51443	110.256	5.83541	294.181	115.721	92.2901	101.218	2.51443
SK15_75_120	145.8	12070	2.01939	0.10296	0.00216857	4.249	0.110737	0.2979	0.00746644	0.93067	1681.24	40.1841	1683.54	36.0865	1678.15	35.6442	99.8422	1678.15	35.6442
SK15_75_121	83.8	167.2	4.37598	0.0483	0.00286761	0.1215	0.00703313	0.01815	0.000504251	0.064744	115.959	3.19743	116.431	6.44233	113.989	114.012	99.5897	115.959	3.19743
SK15_75_122	571	-428824	8.14551	0.09726	0.00200597	3.117	0.0774744	0.2334	0.00601915	0.95381	1333.47	33.1717	1436.89	30.7736	1572.23	32.8198	94.1123	1572.23	32.8198
SK15_75_123	519	626.667	1.69608	0.0481	0.0013876	0.0893	0.00340585	0.01337	0.00033392	0.71799	85.5765	2.14905	86.8511	3.21183	104.191	48.5995	98.5796	85.5765	2.14905
SK15_75_124	121.4	19940	3.91613	0.10436	0.00216102	4.416	0.114584	0.303	0.007669	0.96576	1706.58	41.1622	1715.35	37.0546	1703.06	35.2786	99.465	1703.06	35.2786
SK15_75_125	176.8	12500	2.06061	0.049	0.00187627	0.0794	0.00321897	0.01165	0.000327397	0.50311	74.5245	2.11211	77.5807	3.02723	147.831	74.484	96.2438	74.5245	2.11211
SK15_75_126	239	-6689.29	6.46121	0.0488	0.00170663	0.0965	0.00408472	0.01457	0.000425457	0.54215	93.1372	2.73054	93.5404	3.79465	138.233	76.3877	99.6859	93.1372	2.73054
SK15_75_127	234.2	28842.9	1.25509	0.11509	0.00236203	5.1	0.150013	0.3228	0.00881362	0.96788	1791.18	45.9711	1836.11	41.3515	1881.29	38.5306	98.2181	1881.29	38.5306
SK15_75_129	97.1	-343.2	2.61655	0.0519	0.00199184	0.2358	0.00920058	0.03268	0.000887239	0.34169	206.87	5.54538	214.975	7.79522	281.007	78.1458	96.4295	206.87	5.54538
SK15_75_130	57	8154.55	1.7757	0.1041	0.00235472	4.206	0.109436	0.2926	0.00776247	0.89021	1649	41.339	1675.19	36.3119	1698.47	39.4166	98.7654	1698.47	39.4166
SK15_75_131	174.4	284	2.67896	0.0483	0.00213147	0.0809	0.00257253	0.0121	0.000313949	-0.11187	77.4606	2.02197	78.9907	2.47082	113.989	84.2838	98.1551	77.4606	2.02197
SK15_75_132	66.5	94.7778	1.91092	0.0505	0.0034511	0.166	0.0124508	0.0239	0.000616915	0.36743	151.985	3.86987	155.942	10.4715	218.073	145.447	97.6372	151.985	3.86987
SK15_75_133	115	4640	0.929669	0.08761	0.00187593	2.808	0.0821824	0.2325	0.00606898	0.86954	1345.49	33.5059	1357.67	31.5209	1373.95	31.3061	99.2572	1373.95	31.3061
SK15_75_134	201.1	-5092	1.49295	0.08987	0.00182744	3.009	0.0864039	0.2417	0.00709983	0.9812	1393.2	38.7752	1409.9	32.4262	1422.77	29.3037	98.9806	1422.77	29.3037
SK15_75_135	856	-44076.9	4.06072	0.04748	0.00119776	0.0824	0.00216238	0.01255	0.000303152	0.61728	80.4133	1.94857	80.3988	2.06774	73.4373	34.7649	100	80.4133	1.94857
SK15_75_136	95	-7268.75	3.2646	0.0516	0.00190395	0.1652	0.00676213	0.02315	0.000645654	0.2888	147.045	4.05469	155.245	5.97205	267.725	75.3593	95.0327	147.045	4.05469
SK15_75_137	56.75	-695.455	3.21894	0.0475	0.00267442	0.1691	0.0102727	0.02535	0.000621811	0.13191	161.745	3.97207	158.638	8.98604	74.4384	90.9925	101.729	161.745	3.97207
SK15_75_138	146.9	-916.364	2.21235	0.0503	0.00269482	0.0909	0.00532026	0.01303	0.000341046	0.42908	83.176	2.17074	88.3414	5.02319	208.88	114.96	94.4679	83.176	2.17074
SK15_75_14	95	-213.333	2.00126	0.0484	0.00286828	0.0774	0.00410321	0.01146	0.000291432	-0.37784	73.3698	1.83365	75.6975	3.90528	118.867	95.1232	97.0386	73.3698	1.83365
SK15_75_15	180.6	14310	0.940625	0.10253	0.00218691	3.841	0.106664	0.2731	0.00754145	0.92216	1543.83	40.2346	1601.38	35.3559	1670.42	36.2246	97.1984	1670.42	36.2246
SK15_75_16	423	-3005.83	1.71602	0.0482	0.00146263	0.0965	0.00307976	0.01451	0.000326674	0.37677	92.8264	2.09459	93.5404	2.88862	109.097	50.1732	99.2783	92.8264	2.09459
SK15_75_17	267.3	-1842.22	2.68373	0.06091	0.00130572	0.877	0.0207039	0.10442	0.00221899	0.80798	640.356	13.5422	639.361	14.1671	636.057	21.2339	100.141	640.356	13.5422
SK15_75_18	367	342857	9.36224	0.08753	0.00177784	2.693	0.0653445	0.2222	0.00509893	0.96372	1287.61	28.823	1326.54	28.3542	1372.19	28.2737	97.5088	1372.19	28.2737
SK15_75_19	342	384.857	3.37945	0.0488	0.00196025	0.0895	0.00332327	0.01341	0.0003123	0.20132	85.7549	1.98449	87.0375	3.12986	138.233	77.8692	98.6608	85.7549	1.98449
SK15_75_2	397	1351	1.33941	0.0478	0.00169527	0.0766	0.00251933	0.0116	0.000261197	0.11346	74.3195	1.6737	74.9433	2.4209	89.3818	61.9055	99.2057	74.3195	1.6737
SK15_75_20	545	12737.5	2.69136	0.11376	0.00232737	4.95	0.10959	0.3152	0.00667686	0.95022	1752.19	36.7039	1810.83	37.0897	1860.33	38.0155	97.5381	1860.33	38.0155
SK15_75_21	281.8	-390.5	1.36135	0.0492	0.00147589	0.0972	0.0032464	0.01433	0.000338437	0.55881	91.5636	2.13541	94.1884	3.05077	157.373	54.9636	97.3808	91.5636	2.13541
SK15_75_22	591	-4555.56	2.53648	0.048	0.00138622	0.0866	0.00287921	0.01317	0.000308188	0.44647	84.3127	1.95995	84.3312	2.69212	99.2691	57.5652	100.016	84.3127	1.95995
SK15_75_23	84.6	685	1.65234	0.0493	0.00222984	0.0939	0.00496859	0.01382	0.000372689	0.33645	88.3085	2.38082	91.1299	4.57968	162.123	91.2519	97.0916	88.3085	2.38082
SK15_75_24	118.2	-795	1.9602	0.0477	0.00258266	0.0739	0.00417067	0.01133	0.000295715	0.4967	72.6054	1.88383	72.3936	3.97767	84.4158	93.8105	100.323	72.6054	1.88383
SK15_75_25	245.3	40700	1.94837	0.10629	0.00218381	4.174	0.0925684	0.2836	0.00623952	0.87905	1594.1	34.3852	1668.93	34.4908	1736.74	35.8079	96.4371	1736.74	35.8079
SK15_75_26	169.9	5715	2.84114	0.0456	0.00210755	0.0737	0.00343259	0.01165	0.000271825	0.23279	74.8477	1.73746	72.2045	3.23982	-23.4865	-927.716	103.41	74.8477	1.73746
SK15_75_29	1123	30480	11.6857	0.08862	0.001786	2.862	0.0676197	0.2324	0.00542622	0.95987	1343.14	30.7462	1371.97	29.0052	1395.96	28.3288	98.1847	1395.96	28.3288
SK15_75_3	305	1915.89	1.95388	0.0478	0.00186385	0.0757	0.0029227	0.011546	0.000243419	0.014438	73.9748	1.55848	74.0941	2.7359	89.3818	69.2219	99.8782	73.9748	1.55848
SK15_75_30	228.7	169.556	2.45123	0.0486	0.00204567	0.0777	0.00294362	0.01153	0.000298791	0.15653	73.7974	1.90117	75.9802	2.75617	128.579	79.7801	97.2647	73.7974	1.90117
SK15_75_32	312	8136.36	2.25434	0.0509	0.00131982	0.2136	0.00565155	0.0302	0.000636252	0.27584	191.564	4.04531	196.569	5.00725	236.304	39.6665	97.5737	191.564	4.04531
SK15_75_34	144.3	8586.21	3.97521	0.10806	0.0023151	4.429	0.119358	0.2944	0.00717485	0.90419	1650.08	39.0293	1717.78	37.4901	1766.96	38.0113	96.839	1766.96	38.0113
SK15_75_35	120.7	982.353	3.86859	0.0486	0.00268231	0.158	0.00758918	0.02404	0.000561488	0.44302	153.238	3.60683	148.951	6.79044	128.579	108.828	102.811	153.238	3.60683
SK15_75_36	234.8	-7925	3.44282	0.08711	0.00179211	2.841	0.0672645	0.236	0.00516608	0.94797	1366.11	29.4537	1366.43	28.9333	1362.93	28.7695	99.9586	1362.93	28.7695
SK15_75_38	1980	120476	8.04878	0.09361	0.00189302	2.85	0.0663702	0.2208	0.00522887	0.96927	1269.54	29.3934	1368.81	28.8183	1500.26	30.5418	93.9575	1500.26	30.5418
SK15_75_4	208.9	-4717.24	2.36848	0.0474	0.0022133	0.0749	0.0038071	0.01147	0.000258891	0.40524	73.5272	1.66919	73.3387	3.61288	69.4269	79.2301	100.247	73.5272	1.66919
SK15_75_40	369	2874	1.80176	0.0494	0.00163283	0.0935	0.00320264	0.0137	0.000327835	0.34241	87.534	2.12119	90.7586	3.01036	166.86	60.4891	96.6481	87.534	2.12119
SK15_75_42	262.6	-5037.14	4.30492	0.08695	0.00183317	2.849	0.0668709	0.2355	0.00524157	0.84768	1363.57	29.7969	1368.55	28.9083	1359.39	30.1375	99.6137	1359.39	30.1375
SK15_75_43	34.6	-3830	3.29838	0.0494	0.0031585	0.1344	0.00977678	0.01983	0.00052239	0.4757	126.446	3.28553	128.044	8.79072	166.86	135.614	98.858	126.446	3.28553
SK15_75_44	46.8	-5233.33	1.1567	0.10631	0.00231275	4.433	0.108188	0.3036	0.00705898	0.8223	1705.37	38.5479	1718.53	36.4064	1737.08	38.2492	99.4535	1737.08	38.2492
SK15_75_45	178.4	18991.5	1.04756	0.0977	0.00198336	2.977	0.0771104	0.2213	0.00564265	0.97213	1265.47	31.4405	1401.76	30.9057	1580.68	32.275	91.937	1580.68	32.275
SK15_75_46	627	274250	2.34744	0.10803	0.00220902	4.63	0.105237	0.3114	0.00695687	0.94247	1744.92	37.975	1754.69	36.2297	1766.46	36.1586	99.5953	1766.46	36.1586
SK15_75_47	140.3	-233250	2.59335	0.08856	0.00186688	2.893	0.0681453	0.2378	0.00557042	0.89084	1373.64	31.294	1380.09	29.1587	1394.66	30.7765	99.6494	1394.66	30.7765
SK15_75_48	129.3	-993.077	4.50523	0.0473	0.00185874	0.1178	0.00543698	0.01791	0.000420366	0.68152	114.58	2.68657	113.076	5.039	64.4002	94.7863	101.201	114.58	2.68657
SK15_75_49	65.9	398.667	4.29596	0.0508	0.00224327	0.2284	0.0102716	0.03283	0.000709946	0.10838	208.1	4.4955	208.877	8.67493	231.765	94.6903	99.6931	208.1	4.4955
SK15_75_5	167.2	-119708	1.89784	0.10495	0.00218584	4.244	0.0956066	0.2936	0.00659397	0.83912	1652.66	36.2703	1682.58	34.7086	1713.44	35.5042	98.6282	1713.44	35.5042
SK15_75_50	311	-1635	3.89724	0.0486	0.0017874	0.0759	0.00283978	0.011334	0.000246562	0.28762	72.5477	1.57752	74.2829	2.73765	128.579	71.0219	97.8054	72.5477	1.57752
SK15_75_51	145	5075	1.79901	0.0579	0.00159717	0.598	0.0162494	0.07533	0.0017601	0.41777	467.299	10.8389	475.964	11.8742	525.98	44.6674	98.3662	467.299	10.8389
SK15_75_52	274	-299.571	2.49545	0.0491	0.00162921	0.0949	0.00313885	0.01398	0.000312692	0.17197	89.3489	1.98699	92.0577	2.94533	152.609	59.884	97.2181	89.3489	1.98699
SK15_75_53	718	-2025000	1.04818	0.06171	0.00131368	0.875	0.0251048	0.1032	0.00261153	0.90693	632.427	15.753	638.279	15.975	664.074	20.7955	99.1941	632.427	15.753
SK15_75_54	443	13760	3.40246	0.10528	0.00216886	4.091	0.100874	0.2835	0.00693894	0.94558	1595.74	37.5763	1652.51	35.505	1719.21	35.5426	97.3649	1719.21	35.5426
SK15_75_55	184.4	20853.3	2.11954	0.11107	0.0023063	4.756	0.114646	0.3097	0.00731954	0.9291	1728.11	39.3832	1777.17	37.2069	1817	37.6907	97.8653	1817	37.6907
SK15_75_56	91.8	139.375	2.16509	0.0508	0.00269857	0.154	0.00764764	0.02231	0.000554972	0.22095	141.892	3.52765	145.438	6.84987	231.765	115.975	97.8005	141.892	3.52765
SK15_75_57	286.4	1667.57	2.43124	0.0523	0.002436	0.0844	0.00424963	0.01166	0.000277276	0.43485	74.2743	1.76024	82.2733	4.04829	298.548	99.3514	90.8319	74.2743	1.76024
SK15_75_58	654	-96100	1.28487	0.09317	0.00190585	3.36	0.0831675	0.261	0.00602066	0.93185	1495.31	33.4585	1495.12	31.8618	1491.35	30.9073	99.9888	1491.35	30.9073
SK15_75_6	210	-3932.5	2.31788	0.049	0.00179176	0.086	0.00311743	0.01277	0.000291254	0.43812	81.6587	1.86404	83.7703	2.92625	147.831	84.2019	97.6474	81.6587	1.86404
SK15_75_60	311	24500	4.62798	0.08937	0.00184564	2.883	0.0810782	0.2352	0.00657933	0.96709	1357.56	36.1978	1377.48	31.3709	1412.1	29.8945	98.8543	1412.1	29.8945
SK15_75_61	330.3	-364.333	1.79511	0.0491	0.00171006	0.0817	0.00266082	0.01197	0.000325134	0.26075	76.5536	2.07285	79.742	2.55689	152.609	64.4851	96.192	76.5536	2.07285
SK15_75_63	597	-9446.81	7.83465	0.04785	0.00114575	0.0883	0.00238301	0.01343	0.000302896	0.47524	85.9862	1.94093	85.9185	2.28118	91.8592	36.5685	100.094	85.9862	1.94093
SK15_75_64	304.6	-33775	3.0521	0.08982	0.00186739	2.978	0.0695945	0.2401	0.0057157	0.86311	1384.29	31.9611	1402.02	29.5113	1421.71	30.4869	98.9442	1421.71	30.4869
SK15_75_65	1069	-4800000	1.50563	0.09044	0.00191869	3.002	0.0855909	0.2422	0.00668015	0.94531	1394.96	36.7677	1408.13	31.9088	1434.84	31.929	99.2896	1434.84	31.929
SK15_75_66	84.8	87.125	1.42761	0.0537	0.00337542	0.1076	0.00599926	0.01474	0.000350724	0.36975	93.6305	2.21953	103.768	5.50917	358.489	137.257	90.9018	93.6305	2.21953
SK15_75_67	202.3	815	3.17582	0.0498	0.00205719	0.0987	0.00350809	0.0143	0.000373358	0.073217	91.3029	2.36007	95.5756	3.30759	185.669	80.6781	95.768	91.3029	2.36007
SK15_75_68	91.1	6410	2.25886	0.05	0.00306757	0.0866	0.00557583	0.0127	0.000290028	0.2581	81.1094	1.86368	84.3312	5.18387	194.993	133.473	96.4696	81.1094	1.86368
SK15_75_69	171.4	7242.5	3.05526	0.10842	0.00222988	4.495	0.101445	0.3009	0.00659593	0.88642	1685.39	36.0985	1730.05	35.7028	1773.04	36.5365	98.0186	1773.04	36.5365
SK15_75_70	358	926.667	1.99777	0.049	0.00204949	0.0925	0.00395885	0.01372	0.000384962	0.41151	87.706	2.44146	89.8296	3.75831	147.831	82.6343	97.7891	87.706	2.44146
SK15_75_71	299	10450	4.79167	0.08867	0.00184807	2.998	0.0800263	0.2468	0.00667938	0.94886	1424.13	36.6312	1407.11	31.4327	1397.04	30.0283	101.055	1397.04	30.0283
SK15_75_72	172.9	-283000	2.25718	0.11129	0.00227083	4.847	0.120753	0.3181	0.00756869	0.97072	1774.43	40.7056	1793.09	38.1383	1820.59	37.1561	99.2945	1820.59	37.1561
SK15_75_74	174.5	10190.9	2.11515	0.05	0.00172047	0.0775	0.00245204	0.01138	0.000296482	0.40023	72.711	1.88343	75.7918	2.3531	194.993	77.8695	96.2451	72.711	1.88343
SK15_75_75	223	42125	1.93074	0.0529	0.0022626	0.0953	0.00461225	0.0132	0.000325263	0.61022	83.9767	2.05987	92.4286	4.31702	324.51	90.146	91.4608	83.9767	2.05987
SK15_75_76	210	531	4.83203	0.0487	0.00187315	0.089	0.00323394	0.01337	0.000352708	0.20736	85.5111	2.27381	86.5714	3.04272	133.413	69.7444	98.8981	85.5111	2.27381
SK15_75_77	215.9	-467.5	3.66553	0.0503	0.0015659	0.1553	0.00666763	0.02275	0.000580194	0.70702	144.762	3.69528	146.581	5.97195	208.88	58.7997	98.9302	144.762	3.69528
SK15_75_78	132.6	33000	2.02443	0.0509	0.00251522	0.1494	0.00697267	0.02202	0.000575197	-0.060822	140.043	3.55237	141.382	6.18714	236.304	102.714	99.3123	140.043	3.55237
SK15_75_79	242.2	9985	2.89713	0.1062	0.00216709	4.204	0.103877	0.2908	0.00747769	0.97433	1634.27	40.4578	1674.8	35.5802	1735.18	35.4839	98.252	1735.18	35.4839
SK15_75_8	150.7	339.5	1.8423	0.0496	0.00268962	0.1036	0.00541232	0.0153	0.000365563	0.13927	97.6805	2.345	100.094	5.01647	176.291	114.125	97.7913	97.6805	2.345
SK15_75_80	102.6	928.462	2.07273	0.0472	0.00160659	0.133	0.00455693	0.02065	0.000547877	0.26551	132.008	3.50503	126.79	4.16362	59.358	59.3698	103.922	132.008	3.50503
SK15_75_81	274.8	-1188.74	2.50045	0.0482	0.0019543	0.0761	0.00301272	0.01138	0.000296482	0.41786	72.8781	1.88671	74.4716	2.90924	109.097	75.4078	97.9513	72.8781	1.88671
SK15_75_82	377	505.8	1.98317	0.0476	0.00153177	0.0759	0.00251084	0.01165	0.000300648	0.34505	74.6576	1.91517	74.2829	2.41356	79.4346	53.618	100.517	74.6576	1.91517
SK15_75_83	178.6	-3566.67	2.28681	0.0506	0.00172747	0.219	0.00750962	0.03178	0.000784594	0.28823	201.562	4.96482	201.077	6.49637	222.65	66.8408	100.299	201.562	4.96482
SK15_75_84	70.2	331.25	4.32799	0.0508	0.00206694	0.2313	0.010387	0.03321	0.000813672	0.46761	210.484	5.11098	211.271	8.78866	231.765	84.5926	99.6857	210.484	5.11098
SK15_75_85	151.5	961.429	1.95736	0.047	0.00203067	0.1004	0.00447572	0.01561	0.000387774	0.33043	99.9797	2.44243	97.1455	4.09232	49.2271	69.0976	102.785	99.9797	2.44243
SK15_75_86	45.5	-406.25	3.86905	0.0524	0.00432878	0.163	0.0124349	0.02281	0.000557242	-0.21769	144.753	3.51367	153.326	11.442	302.904	184.006	94.8247	144.753	3.51367
SK15_75_87	240.8	-40220	1.10917	0.1036	0.00213147	4.135	0.0993191	0.2911	0.00689824	0.9442	1641.75	37.4176	1661.25	34.6642	1689.59	34.97	99.1438	1689.59	34.97
SK15_75_88	115.6	-110.286	4.01389	0.0466	0.00248166	0.075	0.00371618	0.01168	0.000342153	0.031538	74.9444	2.1931	73.4332	3.52225	28.7764	62.6713	101.94	74.9444	2.1931
SK15_75_89	168.7	672.353	1.76464	0.0459	0.00184465	0.0758	0.00259003	0.01187	0.000291991	0.11182	76.2264	1.88101	74.1885	2.49005	-7.63342	-62.0217	102.534	76.2264	1.88101
SK15_75_9	259.4	-28600	3.07711	0.10493	0.00222525	4.034	0.0999513	0.2813	0.00632945	0.85354	1584.28	35.0018	1641.08	34.9466	1713.09	36.6454	97.3693	1713.09	36.6454
SK15_75_90	115.4	-181.2	7.39744	0.0457	0.00256815	0.0865	0.00510225	0.01376	0.000365151	0.62478	88.3305	2.32006	84.2377	4.71336	-18.1852	-181.853	104.583	88.3305	2.32006
SK15_75_91	193.7	247.667	2.49935	0.0501	0.00223696	0.0927	0.00422816	0.01338	0.00030201	0.4537	85.4222	1.93445	90.0154	4.02561	199.635	107.393	95.1849	85.4222	1.93445
SK15_75_92	137.5	592	1.37089	0.0467	0.00257534	0.0727	0.00379	0.01151	0.000286168	0.25611	73.8484	1.84201	71.2584	3.68478	33.9129	67.8292	103.531	73.8484	1.84201
SK15_75_93	782	-84166.7	3.28571	0.04794	0.00136389	0.0751	0.00266383	0.01129	0.000351974	0.74643	72.3279	2.23266	73.5276	2.56434	96.3092	45.713	98.4286	72.3279	2.23266
SK15_75_94	394.6	8816.67	1.10874	0.08735	0.00178785	2.836	0.0736625	0.2351	0.00557753	0.9758	1360.6	31.565	1365.11	29.8234	1368.23	28.5956	99.7115	1368.23	28.5956
SK15_75_95	980	-64950	10.219	0.08815	0.00178669	2.861	0.0641493	0.2347	0.00527197	0.93911	1356.92	29.6657	1371.71	28.4677	1385.76	28.4445	99.0798	1385.76	28.4445
SK15_75_97	173	-3400	1.78351	0.09525	0.00200647	3.645	0.0950548	0.2778	0.00740805	0.93863	1585.44	40.4321	1559.42	33.7906	1533.02	32.9252	101.337	1533.02	32.9252
SK15_75_98	79.3	213.25	1.63505	0.0495	0.00315913	0.1292	0.00746171	0.01888	0.000550074	-0.036139	120.41	3.4684	123.379	6.76975	171.582	139.453	97.7265	120.41	3.4684
SK15_75_99	37.5	377	4.4484	0.0465	0.00391215	0.1158	0.0091964	0.01793	0.000501093	0.092159	114.824	3.18454	111.257	8.41113	23.6239	94.4969	102.969	114.824	3.18454
SK15-31A: Pass No Pass
SK15_31A_1	222.8	285.8	1.81286	0.0477	0.00177767	0.0797	0.00271677	0.012119	0.00025855	0.26785	77.6411	1.65411	77.8628	2.61359	84.4158	66.5609	99.7324	77.6411	1.65411
SK15_31A_10	119.1	514	2.5427	0.0492	0.00187836	0.1652	0.00599303	0.02434	0.000534204	-0.05216	155.017	3.40184	155.245	5.38623	157.373	73.7097	99.8595	155.017	3.40184
SK15_31A_101	144.8	-277	3.08085	0.0497	0.00241413	0.1241	0.00549275	0.01808	0.000463524	-0.029379	115.309	2.92365	118.782	5.00305	180.987	99.3502	97.2452	115.309	2.92365
SK15_31A_102	176.1	-1949.44	2.22911	0.048	0.00146	0.1243	0.00421191	0.01849	0.000440854	0.27656	118.163	2.79954	118.963	3.8302	99.2691	65.431	99.2794	118.163	2.79954
SK15_31A_103	216.2	-440.75	2.03578	0.0475	0.00221416	0.1003	0.00394766	0.0153	0.00044276	-0.067213	97.942	2.80009	97.0532	3.74419	74.4384	79.0474	100.855	97.942	2.80009
SK15_31A_104	95.2	147.2	2.35062	0.0484	0.00204378	0.0971	0.00480951	0.01446	0.000382278	0.27561	92.4845	2.44551	94.0959	4.51508	118.867	76.6222	98.3546	92.4845	2.44551
SK15_31A_107	182.4	1536500	0.870644	0.10992	0.00225678	4.811	0.113927	0.3151	0.00762923	0.95485	1761.03	40.9817	1786.82	37.3908	1798.08	36.9297	98.8209	1798.08	36.9297
SK15_31A_108	120.3	264.833	2.22366	0.0497	0.00163647	0.1703	0.00510302	0.02483	0.000585416	0.10162	158.012	3.73935	159.679	4.59197	180.987	61.1029	99.017	158.012	3.73935
SK15_31A_109	84.3	23888.9	1.90724	0.08831	0.00193483	2.901	0.109614	0.2383	0.00838599	0.95675	1376.91	45.3231	1382.17	36.6216	1389.24	32.5744	99.6875	1389.24	32.5744
SK15_31A_11	511	-15000	1.9283	0.0485	0.0014666	0.0803	0.00248782	0.012006	0.000247747	0.13158	76.8417	1.58544	78.4269	2.388	123.73	51.5311	98.0973	76.8417	1.58544
SK15_31A_110	217.7	23766.7	1.29122	0.0519	0.00234253	0.0882	0.00400895	0.01223	0.000297874	0.20786	77.9304	1.90389	85.8252	3.80962	281.007	91.0874	91.3035	77.9304	1.90389
SK15_31A_111	582	4460	1.64873	0.04865	0.00132542	0.0965	0.00340072	0.01445	0.000375661	0.59746	92.3914	2.37891	93.5404	3.20402	130.998	43.4091	98.8707	92.3914	2.37891
SK15_31A_112	517	-874	1.52507	0.049	0.00162801	0.0853	0.00302662	0.01269	0.000300024	0.57718	81.1493	1.90536	83.1156	2.91984	147.831	60.6418	97.8038	81.1493	1.90536
SK15_31A_113	196.3	1082.03	1.8363	0.0474	0.00194646	0.0865	0.00372598	0.01323	0.000309214	0.43209	84.7598	1.96853	84.2377	3.44187	69.4269	68.5153	100.581	84.7598	1.96853
SK15_31A_114	142	-1951.79	2.90984	0.0494	0.00223073	0.0996	0.00394057	0.01443	0.000409133	0.22094	92.176	2.5735	96.407	3.7362	166.86	88.0437	95.799	92.176	2.5735
SK15_31A_115	47.6	169	2.65773	0.0483	0.00392086	0.0888	0.00741581	0.01331	0.000305553	0.44562	85.1725	1.96479	86.3849	6.92555	113.989	165.818	98.6698	85.1725	1.96479
SK15_31A_117	464	87333.3	2.29703	0.06142	0.00128882	0.897	0.0227562	0.1059	0.00271587	0.92246	648.773	16.2584	650.123	14.9117	653.975	19.1588	99.8108	648.773	16.2584
SK15_31A_118	741	762.857	5.09979	0.0482	0.00123377	0.0895	0.00261038	0.0134	0.000322837	0.76221	85.7568	2.0929	87.0375	2.5046	109.097	37.7883	98.5878	85.7568	2.0929
SK15_31A_119	222.7	-671.333	2.44725	0.0509	0.00206793	0.1189	0.00491374	0.01693	0.00037888	0.32109	107.85	2.41968	114.074	4.52051	236.304	80.8043	94.8717	107.85	2.41968
SK15_31A_12	70.8	516.111	2.82409	0.051	0.00173217	0.1726	0.00666381	0.02459	0.000565922	-0.037168	156.238	3.5554	161.673	5.95632	240.83	65.2124	96.8621	156.238	3.5554
SK15_31A_120	642	1288.33	3.41126	0.049	0.00127781	0.1533	0.00488266	0.02242	0.000562728	0.68204	142.914	3.54691	144.821	4.39119	147.831	41.2742	98.6955	142.914	3.54691
SK15_31A_121	175.2	-261.857	2.71207	0.0486	0.0017874	0.1324	0.00522129	0.01943	0.000446553	0.41701	124.038	2.84819	126.252	4.8166	128.579	65.2455	98.2579	124.038	2.84819
SK15_31A_122	241.4	-99810.8	2.90144	0.10445	0.002148	4.138	0.0937295	0.286	0.00650603	0.91765	1611.44	35.5113	1661.84	34.3317	1704.65	35.2105	97.5731	1704.65	35.2105
SK15_31A_123	635	-10112.5	5.13754	0.08766	0.00179825	2.889	0.0655708	0.2378	0.00537304	0.93985	1375.27	30.4238	1379.04	28.7459	1375.04	28.875	99.7248	1375.04	28.875
SK15_31A_124	133.4	8600	2.18689	0.0504	0.00197638	0.1565	0.00523802	0.02264	0.000591124	0.12993	144.049	3.747	147.635	4.73444	213.483	76.7276	97.7542	144.049	3.747
SK15_31A_125	176.9	38935.9	2.86246	0.11013	0.00225864	4.898	0.126476	0.3185	0.0080366	0.94614	1779.54	42.9083	1801.91	38.6618	1801.55	36.9748	98.9171	1801.55	36.9748
SK15_31A_126	270	314.667	2.1827	0.0504	0.00189105	0.0901	0.00402582	0.01305	0.000328818	0.3797	83.2925	2.11013	87.5965	3.8247	213.483	76.4369	95.4165	83.2925	2.11013
SK15_31A_127	509.6	12724	5.09091	0.08728	0.0017931	2.787	0.0642724	0.2314	0.00516801	0.94396	1339.87	29.3538	1352.06	28.3461	1366.68	28.8089	99.2437	1366.68	28.8089
SK15_31A_128	324	-1363.33	1.32245	0.0485	0.0014666	0.1593	0.00527168	0.02372	0.000601627	0.56805	151.233	3.80103	150.09	4.76435	123.73	62.9114	100.689	151.233	3.80103
SK15_31A_129	695	-19116.7	2.55985	0.10557	0.00215084	4.459	0.107485	0.3047	0.00707791	0.97487	1713.26	38.697	1723.37	36.1809	1724.26	35.2085	99.4893	1724.26	35.2085
SK15_31A_13	270.1	351.9	2.71185	0.05057	0.00127115	0.1702	0.00410819	0.02448	0.000532736	0.18761	155.63	3.37231	159.593	3.76663	221.278	36.4786	97.6911	155.63	3.37231
SK15_31A_130	136.6	1701.82	1.88492	0.0503	0.00197536	0.1791	0.00768575	0.02588	0.000544802	0.39166	164.513	3.46887	167.286	6.69838	208.88	78.9526	98.4608	164.513	3.46887
SK15_31A_131	359	-8470	3.95374	0.0863	0.00182731	2.079	0.0583943	0.1743	0.004665	0.9419	1019.16	26.3658	1141.9	26.787	1344.91	29.8746	90.7046	1344.91	29.8746
SK15_31A_132	255.4	1393.33	2.25419	0.0494	0.00205332	0.0833	0.00378623	0.01224	0.000309882	0.45064	78.2434	1.97055	81.2428	3.58688	166.86	85.0308	96.5318	78.2434	1.97055
SK15_31A_133	493	2120.67	2.13051	0.0476	0.00153177	0.0784	0.00295104	0.01194	0.000276813	0.39432	76.5086	1.78532	76.6396	2.84875	79.4346	58.0701	99.8366	76.5086	1.78532
SK15_31A_134	488	340.556	1.90328	0.0484	0.00146527	0.0779	0.00230594	0.01168	0.000267337	0.46357	74.7728	1.71982	76.1687	2.20875	118.867	49.8386	98.279	74.7728	1.71982
SK15_31A_135	98.4	429.333	2.40587	0.0519	0.00216505	0.1742	0.00711184	0.02425	0.000635079	0.045305	153.918	4.02312	163.057	6.30996	281.007	84.9014	94.7275	153.918	4.02312
SK15_31A_14	349	-72388.1	1.2974	0.09674	0.00203171	3.498	0.0777843	0.2616	0.00608143	0.83781	1491.56	33.8187	1526.76	31.4914	1562.18	33.4694	98.1175	1562.18	33.4694
SK15_31A_15	191.1	-64914.9	1.35917	0.10944	0.00230108	4.519	0.106853	0.2992	0.00678589	0.90501	1673.58	37.0444	1734.47	36.1028	1790.11	37.76	97.2825	1790.11	37.76
SK15_31A_16	309	36428.6	2.13103	0.10614	0.00220596	4.527	0.100232	0.3087	0.00682116	0.88523	1734.33	37.4063	1735.94	35.6288	1734.15	36.096	99.9056	1734.15	36.096
SK15_31A_18	416	1320	2.11168	0.0478	0.00153425	0.078	0.00277914	0.01187	0.000270664	0.46903	76.0425	1.72301	76.2629	2.67851	89.3818	56.6367	99.745	76.0425	1.72301
SK15_31A_19	698	13157.1	5.7686	0.09185	0.0018844	3.132	0.103984	0.2483	0.00650393	0.98161	1426.58	35.9964	1440.59	35.6577	1464.29	30.5223	99.2445	1464.29	30.5223
SK15_31A_2	595	-6423.33	1.41937	0.04845	0.00117242	0.1224	0.00303854	0.01837	0.000386501	0.15684	117.334	2.47286	117.246	2.83835	121.3	32.4376	100.086	117.334	2.47286
SK15_31A_20	411.1	13186	2.13337	0.10946	0.00225482	4.517	0.0937353	0.2981	0.0062278	0.84982	1667.43	34.5733	1734.11	34.9858	1790.44	36.8985	96.9883	1790.44	36.8985
SK15_31A_21	302.8	2258	1.79066	0.0471	0.00168741	0.0894	0.00366564	0.01382	0.000301325	0.71966	88.5562	1.91591	86.9443	3.46885	54.3003	56.1208	101.766	88.5562	1.91591
SK15_31A_22	84.6	-8071.43	3.6309	0.0473	0.00391598	0.0808	0.00650396	0.01244	0.000295806	0.029976	79.7297	1.88241	78.8968	6.21115	64.4002	99.5358	101.016	79.7297	1.88241
SK15_31A_23	108.2	-556.429	2.05703	0.0504	0.00251119	0.0936	0.00543271	0.0135	0.000319061	0.48937	86.1519	2.04185	90.8514	5.04149	213.483	101.748	95.1492	86.1519	2.04185
SK15_31A_25	562	3560	1.54821	0.0478	0.00153425	0.0777	0.00261245	0.01181	0.000274573	0.54231	75.6596	1.76061	75.9802	2.5114	89.3818	51.5227	99.6129	75.6596	1.76061
SK15_31A_26	256.9	-2497.41	1.75	0.0473	0.00160777	0.1355	0.00491468	0.02073	0.000484142	0.44282	132.499	3.04618	129.028	4.43	64.4002	55.7643	102.511	132.499	3.04618
SK15_31A_27	717	-943.333	1.17928	0.04674	0.00121748	0.0948	0.00241761	0.01459	0.000308459	0.23514	93.5092	1.98022	91.965	2.31117	35.963	30.7086	101.532	93.5092	1.98022
SK15_31A_28	355.8	1304	2.85096	0.0479	0.0022176	0.0897	0.00349549	0.01365	0.000321604	-0.38482	87.3828	2.0649	87.2239	3.29962	94.3329	79.7016	100.2	87.3828	2.0649
SK15_31A_29	347	-2508	1.20906	0.0495	0.00188152	0.0927	0.00352666	0.01346	0.000318384	0.45315	85.9964	2.04021	90.0154	3.32923	171.582	75.5328	95.7502	85.9964	2.04021
SK15_31A_3	562	7818.18	2.88798	0.0478	0.00119081	0.0952	0.00283465	0.01451	0.000336327	0.68041	92.8737	2.15859	92.3359	2.64865	89.3818	33.8137	100.573	92.8737	2.15859
SK15_31A_30	740	-21722.2	1.9171	0.04804	0.00117709	0.1297	0.00333749	0.01947	0.000433281	0.40652	124.38	2.76225	123.828	3.1217	101.239	33.4703	100.385	124.38	2.76225
SK15_31A_31	351.6	-669.25	2.21411	0.04971	0.00121018	0.1937	0.0043598	0.0283	0.000618754	0.15312	179.892	3.93754	179.781	3.97718	181.456	32.4623	100.066	179.892	3.93754
SK15_31A_32	380	4179.31	1.32867	0.0484	0.00162081	0.0791	0.00287449	0.01191	0.000262372	0.26687	76.2394	1.68175	77.2984	2.68883	118.867	63.5767	98.7383	76.2394	1.68175
SK15_31A_33	239	458.571	2.69448	0.05003	0.00140057	0.1716	0.00504664	0.02487	0.000552274	0.47852	158.198	3.50071	160.807	4.537	196.387	45.7227	98.4793	158.198	3.50071
SK15_31A_34	192.8	34422.2	5.46176	0.11348	0.00240647	4.587	0.114792	0.2937	0.00678704	0.9394	1633.97	36.7143	1746.91	36.9413	1855.88	39.328	95.0246	1855.88	39.328
SK15_31A_35	1699	-6975	7.07033	0.0479	0.00109971	0.0992	0.00274705	0.01504	0.000345515	0.78062	96.2369	2.2171	96.0376	2.56545	94.3329	26.1602	100.203	96.2369	2.2171
SK15_31A_37	98.4	643	1.97551	0.0495	0.00196726	0.164	0.00597983	0.024	0.000588218	0.042679	152.81	3.76492	154.198	5.37546	171.582	77.1507	99.1492	152.81	3.76492
SK15_31A_38	548.7	-5626.67	1.80791	0.04876	0.00126772	0.0949	0.00305981	0.01418	0.000365142	0.71804	90.6605	2.35177	92.0577	2.868	136.307	44.4375	98.5991	90.6605	2.35177
SK15_31A_39	244.4	-6302.5	1.92441	0.0495	0.00179725	0.1304	0.00428505	0.01931	0.0004495	0.2765	123.135	2.88252	124.457	3.89924	171.582	67.4946	99.0652	123.135	2.88252
SK15_31A_4	419.4	5920	1.38325	0.04751	0.00134364	0.0779	0.0024571	0.012001	0.000259636	0.35947	76.9067	1.66218	76.1687	2.35935	74.9387	43.4115	100.964	76.9067	1.66218
SK15_31A_40	215	5396.3	3.59893	0.05082	0.00140498	0.1752	0.00531771	0.02501	0.000563738	0.59763	158.922	3.60261	163.922	4.79598	232.674	45.7604	97.1449	158.922	3.60261
SK15_31A_41	155.9	21709.1	3.31632	0.10272	0.00219749	3.943	0.0978923	0.2813	0.00690303	0.91527	1589.04	37.4906	1622.55	34.6002	1673.84	36.2859	98.4809	1673.84	36.2859
SK15_31A_42	456	2500000	2.16936	0.11006	0.00223906	4.657	0.124093	0.3069	0.00785398	0.98848	1714.93	41.7815	1759.55	38.2564	1800.39	36.6444	98.061	1800.39	36.6444
SK15_31A_43	508	38058.8	2.13087	0.08739	0.0017825	2.861	0.0650779	0.2376	0.0053695	0.96471	1374.63	30.4137	1371.71	28.6055	1369.11	28.4175	100.182	1369.11	28.4175
SK15_31A_44	548	6438.46	1.51885	0.0497	0.00116625	0.1954	0.00518001	0.02851	0.000630895	0.60594	181.217	4.0033	181.226	4.64216	180.987	29.3828	99.9943	181.217	4.0033
SK15_31A_45	241.8	4824.29	1.81941	0.0498	0.00163769	0.1786	0.00598324	0.026	0.000560803	0.18615	165.375	3.55344	166.855	5.28747	185.669	59.9756	99.1668	165.375	3.55344
SK15_31A_46	752	-5250	2.10056	0.04772	0.00123894	0.0863	0.00249381	0.01315	0.000307846	0.601	84.2152	1.95889	84.0508	2.39007	85.4102	38.2216	100.199	84.2152	1.95889
SK15_31A_47	142	30125	5.94142	0.08921	0.00195534	2.37	0.138372	0.1922	0.0106201	0.98326	1116.14	57.7338	1233.6	47.0966	1408.67	32.9093	91.8677	1408.67	32.9093
SK15_31A_48	384.8	2531.5	1.84645	0.04886	0.0012138	0.1654	0.00474372	0.02453	0.000555237	0.70275	156.285	3.5118	155.419	4.32021	141.118	35.3923	100.517	156.285	3.5118
SK15_31A_49	110.2	-311	1.31976	0.0472	0.00168853	0.1746	0.00818255	0.02621	0.000568494	0.51253	167.25	3.62762	163.403	7.18972	59.358	58.4278	102.069	167.25	3.62762
SK15_31A_5	373	2536.36	2.19541	0.0493	0.00155313	0.0958	0.00331075	0.01413	0.000307022	0.56006	90.2801	1.95841	92.892	3.11456	162.123	56.174	97.3715	90.2801	1.95841
SK15_31A_50	265	932	1.47879	0.0465	0.00229671	0.0832	0.00442481	0.01289	0.000303415	0.11543	82.6855	1.93309	81.149	4.13419	23.6239	57.8184	101.743	82.6855	1.93309
SK15_31A_51	95.1	-828.571	3.76038	0.05	0.00180278	0.1585	0.00634814	0.02301	0.000519022	0.35948	146.46	3.28982	149.389	5.65636	194.993	69.4628	98.1671	146.46	3.28982
SK15_31A_52	296	9608.7	1.35098	0.0457	0.00184266	0.09	0.00411461	0.01415	0.000330135	0.47116	90.8222	2.12495	87.5034	3.91327	-18.1852	-1272.97	103.513	90.8222	2.12495
SK15_31A_53	131.1	5613.33	1.40816	0.08771	0.0019716	2.916	0.0755329	0.2415	0.00563373	0.85548	1396.04	31.7053	1386.07	30.2075	1376.14	34.0233	100.608	1376.14	34.0233
SK15_31A_54	167	1138.75	1.40928	0.06066	0.00141076	0.856	0.0221155	0.10212	0.00215581	0.54149	626.812	13.159	627.937	14.5776	627.2	28.9127	99.8223	626.812	13.159
SK15_31A_55	395	-57636.4	1.45274	0.10339	0.00209091	4.305	0.101105	0.3023	0.00693643	0.97502	1704.92	38.1098	1694.32	35.3316	1685.85	34.1627	100.495	1685.85	34.1627
SK15_31A_56	393	-1154	1.07967	0.04816	0.0013389	0.1835	0.00550263	0.02768	0.00067718	0.5113	176.332	4.32561	171.068	4.89545	107.136	44.5233	102.89	176.332	4.32561
SK15_31A_57	1054	-7123.89	5.1165	0.04833	0.00123581	0.0958	0.00347578	0.01447	0.000363528	0.81616	92.5564	2.32052	92.892	3.27724	115.454	37.874	99.6977	92.5564	2.32052
SK15_31A_58	244.9	6840	3.78516	0.049	0.00147323	0.1785	0.00514149	0.02627	0.000620439	0.19005	167.247	3.89756	166.769	4.62179	147.831	51.4153	100.235	167.247	3.89756
SK15_31A_59	294.3	4516.25	5.49067	0.08732	0.00179619	2.803	0.0677254	0.2309	0.00545307	0.93576	1336.98	30.6485	1356.34	28.9121	1367.57	28.8577	98.7374	1367.57	28.8577
SK15_31A_6	262.5	3016.36	2.41268	0.0454	0.00142635	0.0743	0.00233414	0.01191	0.000262372	0.051961	76.5309	1.6756	72.7718	2.23742	-34.1402	-85.3531	104.88	76.5309	1.6756
SK15_31A_60	193.2	293.6	3.51273	0.048	0.00212876	0.094	0.00432948	0.01421	0.000341862	0.25732	90.9393	2.17927	91.2227	4.03672	99.2691	85.3945	99.7107	90.9393	2.17927
SK15_31A_61	135.8	12880.4	2.42068	0.10809	0.00225455	4.792	0.1105	0.3236	0.00717613	0.88798	1813.32	39.2662	1783.5	36.9586	1767.47	37.0222	101.334	1767.47	37.0222
SK15_31A_63	52.77	4926.67	2.86793	0.0511	0.00270083	0.186	0.011612	0.02621	0.000614154	0.53152	166.424	3.88081	173.21	9.65391	245.343	112.556	96.2899	166.424	3.88081
SK15_31A_65	383	8016.67	4.13161	0.0922	0.00220008	3.02	0.125492	0.2371	0.00718655	0.97508	1363.15	38.9511	1412.68	39.7873	1471.51	37.991	97.092	1471.51	37.991
SK15_31A_66	131.5	-25088.9	1.49943	0.10965	0.00234481	4.884	0.119593	0.3231	0.00765294	0.87914	1806.57	41.3058	1799.5	37.9389	1793.6	38.5089	100.297	1793.6	38.5089
SK15_31A_67	276.8	19845	2.49594	0.10924	0.00222112	4.072	0.0988356	0.2696	0.00653939	0.9344	1510.59	35.5042	1648.71	34.7621	1786.78	36.34	93.3316	1786.78	36.34
SK15_31A_68	586	1457	1.21577	0.04699	0.00130818	0.0916	0.00263936	0.01402	0.00033871	0.54584	89.8444	2.16107	88.9928	2.53128	48.7189	38.6197	100.852	89.8444	2.16107
SK15_31A_69	136.1	-2055.08	6.42587	0.0507	0.00149606	0.2327	0.00675794	0.03345	0.000750441	0.39429	212.016	4.73147	212.425	5.83554	227.214	52.9415	99.8491	212.016	4.73147
SK15_31A_7	168.1	-1542	8.57216	0.0491	0.00205045	0.1171	0.00507296	0.01743	0.000412216	0.15492	111.272	2.62833	112.44	4.67749	152.609	84.0415	99.0693	111.272	2.62833
SK15_31A_70	82.6	1228.89	3.45607	0.0499	0.00223517	0.1773	0.00811567	0.02517	0.000596499	0.32189	160.118	3.77504	165.735	7.12332	190.338	89.6516	96.6895	160.118	3.77504
SK15_31A_71	94.4	3685	3.00637	0.047	0.00211981	0.0934	0.00459667	0.01458	0.00037139	0.23081	93.4145	2.39709	90.6657	4.30351	49.2271	138.734	102.917	93.4145	2.39709
SK15_31A_72	736	8069.44	1.68037	0.04748	0.00128115	0.0959	0.0024349	0.01469	0.000334542	0.39493	94.0585	2.13074	92.9847	2.32762	73.4373	39.723	101.102	94.0585	2.13074
SK15_31A_73	93.9	444.785	3.66082	0.0487	0.00324941	0.0963	0.00592195	0.01432	0.000323303	-0.18551	91.5583	2.05337	93.3552	5.52794	133.413	133.44	98.1819	91.5583	2.05337
SK15_31A_74	391	234444	1.96088	0.10481	0.00213985	4.356	0.0938877	0.3005	0.00630318	0.83544	1691.53	35.1355	1704.03	34.6951	1710.98	35.032	99.3987	1710.98	35.032
SK15_31A_75	294.8	7552	4.8013	0.08702	0.00179036	2.878	0.0678907	0.2399	0.00536477	0.88902	1388.27	30.6671	1376.17	29.0847	1360.94	28.7638	100.727	1360.94	28.7638
SK15_31A_76	59.05	142.1	3.04538	0.0512	0.00260933	0.1273	0.00698084	0.01804	0.000475685	0.37152	114.836	2.97588	121.669	6.38519	249.844	104.222	94.73	114.836	2.97588
SK15_31A_77	589	-43350	2.79677	0.10256	0.00206405	3.914	0.107721	0.2774	0.00708098	0.98788	1567.67	38.2194	1616.58	35.644	1670.96	33.6821	97.6293	1670.96	33.6821
SK15_31A_78	122.7	-22871.4	3.05909	0.0496	0.00214338	0.1674	0.00713436	0.02458	0.000556121	0.10337	156.454	3.56082	157.16	6.33663	176.291	89.2403	99.6034	156.454	3.56082
SK15_31A_79	216.1	296556	2.33118	0.08692	0.00179823	2.787	0.0628327	0.2327	0.00528296	0.92984	1347.83	29.9227	1352.06	28.1437	1358.72	28.9553	99.7468	1358.72	28.9553
SK15_31A_8	158.2	2802.7	1.61264	0.047	0.0016863	0.0796	0.00288001	0.01239	0.000306276	0.3657	79.4408	1.99235	77.7688	2.77823	49.2271	56.5285	102.072	79.4408	1.99235
SK15_31A_80	341	6252.86	4.56493	0.08704	0.00177764	2.912	0.0735996	0.2428	0.00587118	0.97827	1404.6	32.858	1385.03	30.1883	1361.38	28.3508	101.17	1361.38	28.3508
SK15_31A_81	91.6	-27717	0.926188	0.10267	0.00222237	4.283	0.104013	0.3008	0.0069103	0.86968	1698.18	37.9948	1690.1	35.547	1672.94	36.6671	100.306	1672.94	36.6671
SK15_31A_82	266.7	-100000	2.72979	0.10867	0.00221361	4.331	0.104805	0.2882	0.0065927	0.96357	1614.36	35.9577	1699.28	35.7221	1777.24	36.247	96.0716	1777.24	36.247
SK15_31A_83	138.4	359.6	2.71906	0.0514	0.00207287	0.1702	0.00742612	0.02422	0.000564574	0.27949	153.827	3.56165	159.593	6.62003	258.809	81.6221	96.6658	153.827	3.56165
SK15_31A_84	203.4	-3653.49	2.69048	0.0485	0.00213328	0.098	0.00445439	0.01446	0.000375815	0.5116	92.4727	2.37998	94.9285	4.15966	123.73	82.8562	97.4919	92.4727	2.37998
SK15_31A_85	380	2534	1.37333	0.04849	0.00119604	0.083	0.00237605	0.01248	0.000301994	0.57716	79.8639	1.93834	80.9615	2.27585	123.244	34.4351	98.7548	79.8639	1.93834
SK15_31A_87	114.4	1328.18	2.53209	0.0496	0.00179835	0.165	0.00676018	0.02384	0.000609703	0.17686	151.78	3.86856	155.07	5.97096	176.291	71.0094	97.9421	151.78	3.86856
SK15_31A_88	162.3	-3122.5	2.2763	0.0502	0.00214896	0.1007	0.00511334	0.01466	0.00034938	0.51761	93.5426	2.22085	97.4223	4.81303	204.264	104.533	96.3008	93.5426	2.22085
SK15_31A_89	233	-391.667	1.76783	0.0498	0.00171814	0.1304	0.00460887	0.01895	0.000496025	0.22842	120.808	3.13451	124.457	4.21503	185.669	64.6872	97.2355	120.808	3.13451
SK15_31A_9	435.4	-18594.1	2.30492	0.0494	0.0015544	0.091	0.00293298	0.01353	0.000296014	0.20137	86.4527	1.89612	88.4345	2.7444	166.86	58.0898	97.9654	86.4527	1.89612
SK15_31A_90	887	-9120	4.19385	0.04849	0.00108656	0.131	0.00520715	0.01947	0.000641664	0.89969	124.309	4.05247	124.996	4.71684	123.244	24.3697	99.4476	124.309	4.05247
SK15_31A_91	333	1032500	6.44101	0.08693	0.00180101	2.801	0.0621871	0.2334	0.00520387	0.90854	1351.76	29.578	1355.8	28.0817	1358.94	28.96	99.7411	1358.94	28.96
SK15_31A_92	609	33416.7	0.877522	0.04904	0.00119919	0.1672	0.00442632	0.02464	0.000566791	0.53815	156.944	3.61862	156.986	4.01332	149.744	33.5229	99.9543	156.944	3.61862
SK15_31A_93	210.5	2694	1.83522	0.0474	0.00177446	0.0785	0.00312328	0.01199	0.000293946	0.53114	76.8473	1.88959	76.7337	2.93163	69.4269	66.5079	100.129	76.8473	1.88959
SK15_31A_94	272.3	-585.333	1.4264	0.0465	0.00168074	0.0777	0.00285918	0.0121	0.000279578	0.33051	77.6383	1.79537	75.9802	2.67571	23.6239	39.5888	102.044	77.6383	1.79537
SK15_31A_95	91.7	1413.33	1.70764	0.0518	0.00243173	0.1243	0.00640236	0.01735	0.000458704	0.22594	110.384	2.90693	118.963	5.81211	276.591	99.2318	93.2107	110.384	2.90693
SK15_31A_96	733	6741.67	1.34743	0.04869	0.00119348	0.0836	0.00211792	0.01246	0.000296143	0.58219	79.7161	1.88142	81.5239	2.02467	132.93	33.5916	97.9173	79.7161	1.88142
SK15_31A_97	289.6	12323.3	3.61548	0.08774	0.00178374	2.889	0.0702747	0.2383	0.00574062	0.95224	1377.94	32.38	1379.04	29.3379	1376.8	28.4118	99.9136	1376.8	28.4118
SK15_31A_98	410	2531.33	2.80822	0.04772	0.00118953	0.1154	0.00286651	0.01748	0.000407824	0.38034	111.786	2.5867	110.893	2.67743	85.4102	32.442	100.736	111.786	2.5867
SK15_31A_99	191.3	136.222	2.58165	0.0483	0.00231153	0.0814	0.00450448	0.01203	0.00030048	0.414	77.0143	1.89203	79.4603	4.30696	113.989	92.0196	97.014	77.0143	1.89203
SK15-73: Columbia River
SK15_73_1	226.8	272.714	1.41839	0.0493	0.00205236	0.0993	0.00428768	0.01453	0.00032703	0.3849	92.8236	2.08004	96.13	3.99425	162.123	83.2033	96.7361	92.8236	2.08004
SK15_73_10	94.3	90.5714	1.88978	0.0489	0.00353786	0.0787	0.0052419	0.01163	0.000306762	-0.42819	74.4065	1.97492	76.922	4.94666	143.039	143.068	96.9023	74.4065	1.97492
SK15_73_100	522	2535.71	1.58807	0.04766	0.00130411	0.0737	0.00240472	0.01119	0.000281045	0.56851	71.7152	1.80676	72.2045	2.30777	82.4251	52.8293	99.3494	71.7152	1.80676
SK15_73_101	259.7	-5880	2.53861	0.10725	0.00218017	4.527	0.102949	0.3009	0.00701258	0.91314	1688.1	38.2213	1735.94	35.8668	1753.21	35.6985	97.6857	1753.21	35.6985
SK15_73_102	294.4	6001.43	2.8722	0.08763	0.00180222	2.905	0.0711098	0.2391	0.00575391	0.94582	1382.65	32.4647	1383.21	29.3432	1374.39	28.9868	99.9135	1374.39	28.9868
SK15_73_103	304.6	68433.3	2.2563	0.0468	0.00194064	0.0731	0.00360935	0.01114	0.000299399	0.6762	71.4742	1.86719	71.637	3.41653	39.0335	58.9537	99.6916	71.4742	1.86719
SK15_73_104	94.7	6975	1.57309	0.09018	0.00198125	3.136	0.0888977	0.2504	0.00673276	0.83219	1441.55	36.8967	1441.57	32.9765	1429.34	32.74	99.9285	1429.34	32.74
SK15_73_105	211.5	29100	2.22397	0.1689	0.00343087	10.95	0.28348	0.4682	0.0114562	0.93385	2445.34	56.682	2518.89	52.5651	2546.77	51.2876	98.2838	2546.77	51.2876
SK15_73_106	111.6	17369.6	2.11765	0.08791	0.00184222	2.885	0.0825245	0.2367	0.00646303	0.92982	1368.62	35.7484	1378	31.362	1380.52	30.1071	99.3845	1380.52	30.1071
SK15_73_107	185.8	623	1.18118	0.0477	0.00230654	0.0743	0.00371055	0.01116	0.000293118	0.28191	71.52	1.86623	72.7718	3.51831	84.4158	76.7602	98.3122	71.52	1.86623
SK15_73_108	257	9268.29	1.57669	0.04881	0.00133457	0.1734	0.00568129	0.02587	0.000719516	0.73292	164.762	4.52631	162.365	5.07615	138.714	48.8456	101.406	164.762	4.52631
SK15_73_109	63	61.5556	2.96471	0.0501	0.00373684	0.1053	0.00904849	0.01479	0.000428483	0.35009	94.3801	2.74672	101.657	8.35567	199.635	130.856	93.1017	94.3801	2.74672
SK15_73_11	273.5	-1861.67	2.08302	0.0481	0.00146132	0.0921	0.00294669	0.013874	0.000294277	-0.24881	88.7876	1.88412	89.4577	2.75985	104.191	54.139	99.2902	88.7876	1.88412
SK15_73_111	668	-183333	9.25208	0.09403	0.00193844	2.87	0.0748249	0.219	0.00548401	0.95348	1258.79	30.2502	1374.07	29.9874	1508.72	31.605	92.9056	1508.72	31.605
SK15_73_113	42.3	15333.3	2.30769	0.0456	0.00275531	0.1166	0.00671775	0.01849	0.000613883	0.1453	118.524	3.9113	111.985	6.12352	-23.4865	#DIV/0!	105.466	118.524	3.9113
SK15_73_116	112.7	-534	3.18182	0.0519	0.00355492	0.1136	0.00783658	0.01566	0.000426842	0.24764	99.6739	2.68075	109.253	7.1456	281.007	140.616	91.6848	99.6739	2.68075
SK15_73_117	166.3	1282	3.43595	0.0493	0.00196525	0.0872	0.00313074	0.01267	0.000363059	0.076475	80.9909	2.27391	84.8917	2.93964	162.123	91.8892	95.6077	80.9909	2.27391
SK15_73_118	76.8	-11840	3.25148	0.10526	0.0022217	3.73	0.13291	0.2545	0.00833475	0.94975	1435.43	41.7344	1577.83	39.663	1718.86	36.4111	92.6362	1718.86	36.4111
SK15_73_119	328.5	536.4	1.58849	0.0469	0.00168518	0.0896	0.00393208	0.01367	0.000370469	0.52801	87.6217	2.37448	87.1307	3.64471	44.1381	57.3864	100.453	87.6217	2.37448
SK15_73_12	204.5	1498.46	1.65587	0.0471	0.00194354	0.1059	0.00461475	0.01622	0.000361712	0.32092	103.853	2.30588	102.208	4.31519	54.3003	65.5141	101.481	103.853	2.30588
SK15_73_120	383.7	-2544	1.3163	0.04649	0.00125977	0.0721	0.00222921	0.0111	0.000273649	0.69292	71.2466	1.74119	70.6903	2.13498	23.1078	53.9201	100.666	71.2466	1.74119
SK15_73_121	255	-365	1.95702	0.04952	0.0012484	0.1656	0.00542765	0.02421	0.000603365	0.69278	154.133	3.84554	155.593	4.91146	172.525	36.4846	99.11	154.133	3.84554
SK15_73_122	92.3	-151.75	3.5229	0.048	0.00401642	0.074	0.0063742	0.01106	0.000285183	0.099926	70.8544	1.85642	72.4882	5.9853	99.2691	158.843	97.8172	70.8544	1.85642
SK15_73_123	147.2	-1576	1.62832	0.0494	0.00214153	0.1228	0.00548105	0.01777	0.000403	0.10357	113.387	2.5651	117.607	5.0779	166.86	87.5631	96.5475	113.387	2.5651
SK15_73_124	213	-2214.29	1.42953	0.0493	0.00205236	0.0829	0.00387285	0.0122	0.000371397	0.53198	77.9987	2.38015	80.8678	3.67751	162.123	78.4562	96.6644	77.9987	2.38015
SK15_73_125	314	424	1.86905	0.0489	0.00187523	0.0767	0.00336944	0.01125	0.000307774	0.52152	71.9845	1.93837	75.0376	3.26317	143.039	71.077	96.1081	71.9845	1.93837
SK15_73_127	697	3806.25	1.89918	0.04922	0.00139612	0.0981	0.00259604	0.0142	0.000391862	0.44	90.7345	2.48447	95.021	2.48341	158.324	55.4485	95.6581	90.7345	2.48447
SK15_73_128	255.5	4955	1.38183	0.0482	0.00186797	0.0874	0.00373437	0.0131	0.000355308	0.55676	83.8452	2.31704	85.0785	3.5356	109.097	69.4598	98.6145	83.8452	2.31704
SK15_73_129	61.4	15828.6	2.77828	0.0482	0.00213056	0.202	0.0107852	0.03015	0.000939153	0.51092	191.906	5.92176	186.817	9.36887	109.097	84.1032	102.5	191.906	5.92176
SK15_73_13	155.4	183.875	2.20113	0.0475	0.00161012	0.107	0.00410239	0.01625	0.000371517	0.32767	103.991	2.35324	103.217	3.80854	74.4384	58.9895	100.673	103.991	2.35324
SK15_73_130	395	1777.5	2.14092	0.04994	0.00120271	0.2077	0.00605109	0.03013	0.000822634	0.81419	191.357	5.18695	191.621	5.32732	192.201	31.431	99.8649	191.357	5.18695
SK15_73_131	255	-554.667	1.26238	0.0479	0.00249154	0.0725	0.00315317	0.01096	0.00029673	-0.12731	70.2251	1.91286	71.0691	2.96217	94.3329	97.2991	98.8733	70.2251	1.91286
SK15_73_132	228.5	302.8	2.20347	0.048	0.00153675	0.0731	0.00272533	0.01102	0.000266601	0.1296	70.5991	1.69581	71.637	2.62635	99.2691	77.5038	98.6235	70.5991	1.69581
SK15_73_133	522	2761.54	2.73298	0.0472	0.00137519	0.0751	0.00283125	0.01132	0.000289235	0.53218	72.5877	1.88338	73.5276	2.73066	59.358	45.7502	98.6887	72.5877	1.88338
SK15_73_134	185.4	543.333	2.48859	0.0476	0.00169302	0.0977	0.00374941	0.01477	0.000345921	0.44356	94.5538	2.18805	94.651	3.54602	79.4346	59.358	99.8586	94.5538	2.18805
SK15_73_135	106.4	-3659.09	2.48019	0.0475	0.00295677	0.0832	0.0053646	0.01257	0.000347566	0.32619	80.5389	2.20154	81.149	5.06971	74.4384	111.668	99.2327	80.5389	2.20154
SK15_73_136	198	454	2.82454	0.0484	0.0024954	0.0764	0.00391086	0.0114	0.000361087	0.24909	72.9871	2.31726	74.7547	3.71648	118.867	99.0842	97.7509	72.9871	2.31726
SK15_73_137	157.5	7764.29	1.98613	0.0896	0.00188047	2.856	0.0703114	0.228	0.00545835	0.91966	1316.7	30.7678	1370.39	29.534	1417.02	30.7763	96.6153	1417.02	30.7763
SK15_73_138	162.3	119	1.85063	0.0465	0.00185065	0.0735	0.00316242	0.01104	0.000326118	0.47072	70.862	2.06458	72.0154	2.97277	23.6239	44.6964	98.2824	70.862	2.06458
SK15_73_139	85.5	75.8889	1.77386	0.0468	0.00211804	0.0874	0.00373437	0.01328	0.000295708	-0.27876	85.1437	1.9036	85.0785	3.5356	39.0335	71.4272	99.9606	85.1437	1.9036
SK15_73_140	108.7	-759	2.60048	0.0498	0.00344703	0.0804	0.00621174	0.01158	0.000287295	0.58946	74.0028	1.84232	78.5209	5.91384	185.669	144.457	94.5233	74.0028	1.84232
SK15_73_141	297	-499.5	2.19675	0.049	0.00179176	0.0763	0.00292894	0.01113	0.000320079	0.29639	71.2104	2.06553	74.6603	2.74376	147.831	72.4466	95.5691	71.2104	2.06553
SK15_73_15	524	-850	1.42779	0.04806	0.00126996	0.0735	0.0018976	0.01103	0.000261274	0.28914	70.6576	1.66447	72.0154	1.81246	102.224	40.1398	98.1939	70.6576	1.66447
SK15_73_16	220.9	3272.22	2.29626	0.0498	0.00155949	0.1569	0.005084	0.02285	0.000552222	0.50691	145.486	3.47432	147.986	4.58341	185.669	67.1194	98.4166	145.486	3.47432
SK15_73_17	137.1	12070	2.71485	0.10623	0.0021601	4.41	0.107239	0.3009	0.00722609	0.90121	1690.47	39.2488	1714.22	36.0063	1735.7	35.3359	98.9237	1735.7	35.3359
SK15_73_18	261	-993.333	2.4011	0.051	0.00189747	0.1377	0.00485639	0.01949	0.000447598	0.24149	124.039	2.846	130.993	4.45445	240.83	71.5948	94.9911	124.039	2.846
SK15_73_19	94.7	5406.67	2.27262	0.10185	0.00214125	4.092	0.0953876	0.2919	0.0067559	0.82252	1650.14	37.1199	1652.71	34.4484	1658.11	35.2668	99.8976	1658.11	35.2668
SK15_73_21	587	2135	3.88742	0.0496	0.00148124	0.0836	0.00309121	0.01221	0.000349476	0.69765	78.0325	2.23118	81.5239	2.89961	176.291	50.4922	95.9646	78.0325	2.23118
SK15_73_22	603	-14642.9	1.14857	0.10763	0.00226356	4.343	0.110312	0.2933	0.00721457	0.97317	1644.95	38.9413	1701.57	36.4313	1759.68	37.1846	97.4396	1759.68	37.1846
SK15_73_23	379	133500	1.93367	0.0472	0.00160659	0.0782	0.00278138	0.01191	0.000281495	0.47916	76.356	1.80391	76.4512	2.67801	59.358	53.9749	99.8325	76.356	1.80391
SK15_73_24	458	6010	7.39903	0.08763	0.00178528	2.667	0.0637978	0.2194	0.00543089	0.97158	1271.67	30.5378	1319.36	28.1141	1374.39	28.4665	96.9183	1374.39	28.4665
SK15_73_25	195.9	1312	1.77607	0.0494	0.00205332	0.0789	0.00365788	0.01147	0.000291589	0.54562	73.34	1.89347	77.1102	3.46279	166.86	80.4467	95.3434	73.34	1.89347
SK15_73_26	493	868	1.57056	0.0488	0.00139735	0.102	0.00330478	0.01498	0.000371699	0.65811	95.7451	2.37163	98.6208	3.1069	138.233	47.1605	97.1916	95.7451	2.37163
SK15_73_27	300	632.857	1.42857	0.04957	0.00131901	0.1714	0.0048991	0.02516	0.000571061	0.43887	160.122	3.6253	160.633	4.37711	174.88	41.833	99.721	160.122	3.6253
SK15_73_28	144.8	966	2.85039	0.0519	0.00199184	0.1662	0.00783958	0.02278	0.000519684	0.62351	144.656	3.30319	156.116	6.94593	281.007	78.7174	93.009	144.656	3.30319
SK15_73_29	546	14838.1	3.04688	0.0615	0.0012816	0.822	0.0184617	0.0975	0.00219146	0.92355	598.522	13.3408	609.164	13.0586	656.767	18.4914	98.4532	598.522	13.3408
SK15_73_3	88.7	-11838.5	2.0676	0.10547	0.00233016	4.371	0.100216	0.3036	0.0069108	0.677	1707.34	37.7029	1706.87	35.3555	1722.52	38.4189	100.133	1722.52	38.4189
SK15_73_30	70	-405.333	2.82486	0.0469	0.00285829	0.0964	0.00582814	0.01475	0.000368001	-0.0019617	94.5104	2.35318	93.4478	5.43412	44.1381	80.9247	101.008	94.5104	2.35318
SK15_73_31	281	-626.667	2.42241	0.0501	0.00223696	0.0792	0.00313034	0.0114	0.000257651	0.032896	72.829	1.6464	77.3925	2.94018	199.635	90.4494	94.4192	72.829	1.6464
SK15_73_33	289.1	487778	5.42402	0.10184	0.00207571	3.608	0.0957918	0.2547	0.00686359	0.95647	1443.16	36.7128	1551.3	34.0394	1657.92	33.9312	94.2869	1657.92	33.9312
SK15_73_34	162.6	425.75	3.85308	0.0509	0.00173099	0.2533	0.00896796	0.03557	0.000943658	0.58046	225.246	5.95794	229.253	7.55245	236.304	64.6196	98.2822	225.246	5.95794
SK15_73_35	291	22133.3	2.328	0.0478	0.00177875	0.0769	0.00260297	0.01155	0.000286812	-0.0052772	74.0003	1.84314	75.2262	2.42407	89.3818	62.7829	98.409	74.0003	1.84314
SK15_73_36	299.9	25375	3.52824	0.10547	0.00228947	4.219	0.0965867	0.2918	0.00627287	0.817	1641.46	34.603	1677.72	34.7666	1722.52	37.5762	98.3784	1722.52	37.5762
SK15_73_37	225	-2582.86	5.29412	0.0492	0.00213969	0.0923	0.00431483	0.01371	0.000364398	0.70525	87.62	2.30471	89.6437	4.02331	157.373	86.3587	97.921	87.62	2.30471
SK15_73_38	550	-781.667	19.4346	0.0479	0.00161486	0.0968	0.00300634	0.01451	0.000364165	0.35222	92.8618	2.32545	93.8182	2.81646	94.3329	55.4648	98.9844	92.8618	2.32545
SK15_73_39	300	-22666.7	1.54639	0.0508	0.0018117	0.0828	0.00308259	0.01156	0.000270284	0.40427	73.7812	1.72139	80.774	2.97846	231.765	68.5633	91.7289	73.7812	1.72139
SK15_73_4	405	444.286	2.58456	0.049	0.00162801	0.09	0.003	0.01326	0.000309727	0.36777	84.7783	1.96776	87.5034	2.81125	147.831	61.4938	97.045	84.7783	1.96776
SK15_73_40	244.1	-329	1.70938	0.0466	0.00202697	0.0739	0.00352484	0.01145	0.000268405	0.46735	73.4742	1.73421	72.3936	3.33088	28.7764	59.0314	101.379	73.4742	1.73421
SK15_73_41	532.5	-2510	2.09069	0.04894	0.00119756	0.1629	0.00485536	0.02387	0.000580354	0.71881	152.097	3.69716	153.238	4.43147	144.957	33.7243	99.2363	152.097	3.69716
SK15_73_42	147.4	756.842	2.58144	0.0492	0.00196424	0.1133	0.00468452	0.01666	0.000378711	0.10383	106.37	2.39434	108.98	4.38009	157.373	78.2421	97.7361	106.37	2.39434
SK15_73_43	92.4	137.444	2.03256	0.0504	0.00241993	0.1584	0.00814163	0.0228	0.000551395	0.52796	145.06	3.52188	149.302	7.15709	213.483	97.5081	97.3383	145.06	3.52188
SK15_73_44	229.7	313.8	2.02023	0.0502	0.00156461	0.0807	0.00249299	0.01161	0.000281987	0.33466	74.1559	1.78692	78.8028	2.31822	204.264	54.7579	94.4277	74.1559	1.78692
SK15_73_45	217.4	1685	2.01857	0.0488	0.00213602	0.0882	0.00374188	0.01305	0.000354572	0.10358	83.4627	2.24255	85.8252	3.5443	138.233	83.7927	97.3857	83.4627	2.24255
SK15_73_46	188.1	-43750	2.73004	0.0503	0.00149065	0.2167	0.00724041	0.03152	0.000763089	0.55292	200.006	4.82536	199.16	6.31587	208.88	51.3663	100.449	200.006	4.82536
SK15_73_47	141	-3739.29	1.54098	0.0467	0.00257534	0.0817	0.00478748	0.01258	0.000321407	0.38125	80.6847	2.01173	79.742	4.49467	33.9129	67.8292	101.064	80.6847	2.01173
SK15_73_48	284	8006.67	2.65918	0.0478	0.00177875	0.0955	0.00355642	0.01459	0.000332787	0.36911	93.3832	2.11845	92.614	3.35757	89.3818	70.323	100.82	93.3832	2.11845
SK15_73_49	281.4	242.125	1.21977	0.0482	0.00178306	0.0773	0.0026077	0.01167	0.000258022	-0.11437	74.7281	1.6458	75.6033	2.50733	109.097	68.8346	98.9296	74.7281	1.6458
SK15_73_5	344	-2125	1.5426	0.0492	0.00147589	0.0868	0.00288161	0.01274	0.000364037	0.68231	81.4469	2.35215	84.518	2.69615	157.373	49.5313	96.5576	81.4469	2.35215
SK15_73_50	201	479.5	1.88555	0.04861	0.00122179	0.1086	0.00288575	0.01614	0.000351852	0.58878	103.145	2.24254	104.684	2.6978	129.063	36.3905	98.5962	103.145	2.24254
SK15_73_51	360.6	-1920.67	2.94367	0.04866	0.00127907	0.0909	0.00255834	0.01351	0.000336167	0.61106	86.4069	2.16167	88.3414	2.38292	131.481	40.541	97.9246	86.4069	2.16167
SK15_73_52	156.2	-880.667	2.85558	0.0499	0.0014128	0.2015	0.00665814	0.02899	0.000710118	0.72612	184.193	4.50892	186.395	5.84532	190.338	49.6727	98.8354	184.193	4.50892
SK15_73_54	391	13575	6.3474	0.08809	0.00178088	2.873	0.0667656	0.2319	0.00541766	0.93645	1341.26	30.7139	1374.86	28.9017	1384.45	28.2695	97.7882	1384.45	28.2695
SK15_73_55	401	9183.33	5.63994	0.08902	0.00192048	2.885	0.0669723	0.2377	0.00551729	0.94531	1372.25	30.7968	1378	29.1467	1404.59	31.8487	99.7626	1404.59	31.8487
SK15_73_56	328.6	7643.33	3.33943	0.08799	0.0017869	2.87	0.0729367	0.2336	0.0057782	0.95975	1351.01	31.8767	1374.07	29.9874	1382.27	28.4458	98.4912	1382.27	28.4458
SK15_73_57	549	1463.33	1.15094	0.04973	0.00132802	0.0934	0.00259411	0.01352	0.000309219	0.38855	86.3527	1.97471	90.6657	2.48642	182.393	41.7049	95.4844	86.3527	1.97471
SK15_73_58	294	-9044.44	2.98477	0.0502	0.00197434	0.1664	0.00668697	0.02403	0.000588707	0.42476	152.863	3.70719	156.29	5.98419	204.264	77.7278	97.9433	152.863	3.70719
SK15_73_59	306	95000	19.7419	0.0491	0.00222808	0.1065	0.00462027	0.0157	0.000434276	0.26738	100.285	2.76126	102.759	4.46821	152.609	91.8223	97.7265	100.285	2.76126
SK15_73_6	540	-1078750	1.32029	0.09668	0.00198756	3.64	0.0825884	0.2708	0.00609697	0.92212	1543.15	33.8829	1558.32	32.3583	1561.02	32.4644	99.1362	1561.02	32.4644
SK15_73_60	314.1	592.2	30.0862	0.0496	0.00163526	0.1097	0.00404644	0.01587	0.000355447	0.5131	101.301	2.25849	105.691	3.75188	176.291	59.8808	96.036	101.301	2.25849
SK15_73_61	162	1284.21	2.97248	0.0502	0.00141705	0.1778	0.00542726	0.02583	0.000725931	0.68839	164.219	4.58307	166.166	4.82743	204.264	42.1965	98.9354	164.219	4.58307
SK15_73_62	179	1178	2.20715	0.0487	0.00240597	0.0753	0.00381025	0.01104	0.000256228	0.17959	70.6637	1.63835	73.7165	3.61504	133.413	99.0849	96.0144	70.6637	1.63835
SK15_73_63	505	-625.714	1.36486	0.0478	0.00153425	0.0954	0.00322498	0.0144	0.000356432	0.33791	92.1729	2.25552	92.5213	3.03096	89.3818	56.0149	99.6164	92.1729	2.25552
SK15_73_64	441	-21300	3.34344	0.09125	0.00185114	3.079	0.0780775	0.2418	0.00574429	0.93924	1391.22	32.0695	1427.48	30.9705	1451.83	29.7552	97.7982	1451.83	29.7552
SK15_73_65	50.2	114.667	3.45254	0.0492	0.00489982	0.0796	0.0076671	0.01172	0.000328395	-0.16851	74.9514	2.11853	77.7688	7.17677	157.373	196.741	96.5846	74.9514	2.11853
SK15_73_66	418	57923.1	4.66518	0.122	0.00286419	5.158	0.142288	0.3044	0.00781497	0.90987	1672.99	40.853	1845.71	40.2351	1985.68	45.4038	92.8145	1985.68	45.4038
SK15_73_67	168.4	167.714	2.76519	0.0511	0.0031693	0.0834	0.00536584	0.0118	0.00029681	0.53572	75.2781	1.86184	81.3365	5.0702	245.343	138.759	92.9747	75.2781	1.86184
SK15_73_68	226.4	-5998	3.69935	0.08699	0.00184364	2.733	0.0649054	0.2242	0.00490981	0.7052	1299.79	27.8413	1337.47	28.4204	1360.27	30.5976	97.4994	1360.27	30.5976
SK15_73_7	286	494.75	1.48958	0.0477	0.00161249	0.078	0.00277914	0.01182	0.000269787	0.2373	75.7331	1.72219	76.2629	2.59686	84.4158	55.3326	99.3273	75.7331	1.72219
SK15_73_70	462	-708	1.57679	0.04854	0.00135829	0.0871	0.00272847	0.01301	0.000328183	0.61064	83.2356	2.11155	84.7983	2.54679	125.671	45.6756	98.2649	83.2356	2.11155
SK15_73_71	171.2	-390	1.5097	0.0466	0.00176596	0.0726	0.00271998	0.01123	0.000300741	0.31952	72.0678	1.94183	71.1637	2.61931	28.7764	49.9834	101.161	72.0678	1.94183
SK15_73_72	131.3	11650	1.17023	0.10113	0.00209089	4.23	0.101455	0.2997	0.00737686	0.94764	1695.56	39.9234	1679.86	35.3519	1644.96	34.2714	100.593	1644.96	34.2714
SK15_73_73	249.9	56354.2	1.55121	0.07628	0.00160545	1.927	0.0454019	0.1829	0.00460662	0.88973	1081.76	26.8631	1090.5	23.8604	1102.43	25.5983	99.2938	1102.43	25.5983
SK15_73_74	450	1015	2.14286	0.0462	0.00159492	0.073	0.00272426	0.01138	0.000284081	0.53293	73.0639	1.83051	71.5423	2.62546	8.06916	20.5403	101.962	73.0639	1.83051
SK15_73_75	932	-263585	62.973	0.10286	0.00214013	3.695	0.0915271	0.2571	0.00605641	0.97328	1454.46	33.0923	1570.29	33.621	1676.36	35.2863	93.931	1676.36	35.2863
SK15_73_76	1650	10583.3	20.5736	0.04821	0.00127224	0.0876	0.00273487	0.01305	0.000322833	0.65372	83.5255	2.05622	85.2652	2.6277	109.587	39.2713	98.0254	83.5255	2.05622
SK15_73_77	199.1	-4190	4.4442	0.10454	0.00215941	4.167	0.106309	0.2875	0.00694784	0.88101	1619.59	38.0082	1667.56	35.7968	1706.24	35.4225	97.6893	1706.24	35.4225
SK15_73_78	256	19000	1.59701	0.10107	0.00209229	3.892	0.115257	0.2803	0.00744562	0.9421	1587.01	40.3454	1612.02	36.9305	1643.86	34.3069	98.812	1643.86	34.3069
SK15_73_8	318.9	-1504	2.67983	0.0485	0.00139316	0.1086	0.00331173	0.01627	0.000404333	0.2649	103.986	2.56325	104.684	3.10996	123.73	49.1453	99.384	103.986	2.56325
SK15_73_80	85.2	553.286	0.384824	0.0616	0.00171983	0.659	0.0199678	0.0772	0.0022235	0.58352	476.407	13.4104	514.002	13.9286	660.251	40.8562	93.2658	476.407	13.4104
SK15_73_81	81	-3810	4.19907	0.0494	0.00223073	0.1633	0.0079973	0.02381	0.0007051	0.39581	151.629	4.48066	153.588	7.10229	166.86	93.2144	98.7647	151.629	4.48066
SK15_73_82	434	2218.75	1.67568	0.0496	0.00125577	0.095	0.00298329	0.01369	0.000317122	0.71927	87.4481	2.01324	92.1504	2.79491	176.291	37.6527	95.1192	87.4481	2.01324
SK15_73_83	152.4	169.286	2.83799	0.0498	0.00287785	0.0905	0.00550601	0.01309	0.000376084	0.15869	83.6107	2.38186	87.969	5.1107	185.669	114.998	95.3018	83.6107	2.38186
SK15_73_84	200.1	-208.375	3.27496	0.0488	0.00204758	0.0947	0.00442575	0.014	0.000368782	0.41381	89.5104	2.39994	91.8722	4.13373	138.233	83.7927	97.5528	89.5104	2.39994
SK15_73_85	387	714.286	1.93114	0.0492	0.00171122	0.1503	0.00516489	0.02171	0.000590364	0.49007	138.385	3.72823	142.177	4.66596	157.373	64.4567	97.3817	138.385	3.72823
SK15_73_86	70.8	481.765	2.07381	0.048	0.00267798	0.1311	0.00813418	0.01945	0.000446902	0.072201	124.259	2.85272	125.086	7.34397	99.2691	99.289	99.2752	124.259	2.85272
SK15_73_87	302.8	-84873	3.07724	0.10883	0.00222677	4.502	0.112833	0.3008	0.00775901	0.97026	1683.88	41.2631	1731.34	37.3419	1779.92	36.4645	97.9168	1779.92	36.4645
SK15_73_88	181.3	-23063.6	4.28605	0.10358	0.00210986	3.341	0.0871832	0.2315	0.00598973	0.95701	1311.8	32.719	1490.69	32.5272	1689.24	34.5228	90.0494	1689.24	34.5228
SK15_73_89	258	249.143	1.60748	0.0475	0.00186078	0.0751	0.00308966	0.01139	0.000257474	0.19393	73.007	1.6553	73.5276	2.71239	74.4384	64.3467	99.2955	73.007	1.6553
SK15_73_9	234.9	28500	3.05462	0.09002	0.00186074	2.857	0.0697494	0.2292	0.00559044	0.92625	1322.71	31.3952	1370.66	29.1817	1425.95	30.1887	97.0561	1425.95	30.1887
SK15_73_90	42.2	623	2.11	0.05	0.00306757	0.1699	0.00859979	0.02459	0.000775801	-0.20528	156.437	4.91925	159.332	7.51475	194.993	133.473	98.2851	156.437	4.91925
SK15_73_91	435	-8955	10	0.05556	0.0011915	0.5325	0.0126358	0.069	0.00170423	0.78088	430.064	10.6605	433.467	9.768	434.828	19.8369	99.2296	430.064	10.6605
SK15_73_92	256.7	-2140	1.32799	0.05116	0.00136932	0.2972	0.00988641	0.04147	0.00119478	0.80555	262.041	7.45564	264.211	8.14833	248.045	37.295	99.1399	262.041	7.45564
SK15_73_93	542	56923.1	2.15079	0.08802	0.00179486	2.797	0.065987	0.2279	0.00574677	0.96723	1318.87	31.902	1354.74	28.5409	1382.92	28.7104	97.6931	1382.92	28.7104
SK15_73_94	178.9	30180	3.98619	0.10551	0.00220804	4.216	0.112849	0.2841	0.00731062	0.91976	1598.57	39.2732	1677.14	36.3476	1723.22	36.1777	96.1147	1723.22	36.1777
SK15_73_95	142.1	12795	2.58364	0.10561	0.00216605	4.465	0.120563	0.3046	0.00794497	0.93241	1712.61	42.3934	1724.49	37.6122	1724.96	35.4836	99.3963	1724.96	35.4836
SK15_73_96	174.5	547.667	3.18547	0.0485	0.00187107	0.1064	0.00461935	0.01574	0.000389871	0.39386	100.616	2.50912	102.667	4.23368	123.73	73.0628	98.0611	100.616	2.50912
SK15_73_97	91.9	401.5	2.45067	0.0475	0.00258118	0.0982	0.00555853	0.0148	0.000407451	0.3298	94.7569	2.61447	95.1134	5.16383	74.4384	93.0599	99.5735	94.7569	2.61447
SK15_73_98	83.1	-4326.67	2.77926	0.0503	0.00214989	0.1832	0.00834715	0.02611	0.000780444	0.39551	165.963	4.8945	170.81	7.25503	208.88	84.7593	97.2751	165.963	4.8945
KG-100B: Northern area (Miner's Ridge)
KG_100B_1	226.1	-1583.08	1.49241	0.0485	0.00204472	0.1018	0.00493916	0.015	0.000390512	0.66556	95.909	2.49691	98.4365	4.54955	123.73	77.6161	98	95.909	2.49691
KG_100B_10	1304	9618.18	3.10476	0.04771	0.00107726	0.0874	0.00265622	0.01333	0.000358714	0.85938	85.364	2.34065	85.0785	2.47663	84.913	24.0355	100	85.364	2.34065
KG_100B_100	740	56782.6	1.83805	0.10741	0.0021969	4.229	0.123506	0.285	0.00799062	0.96896	1599.41	42.323	1679.67	37.6529	1755.93	35.953	96	1755.93	35.953
KG_100B_101	57.6	-84.25	2.36842	0.0496	0.00315976	0.1295	0.00888584	0.01918	0.000630198	0.50948	122.296	3.94469	123.648	8.09618	176.291	143.28	99	122.296	3.94469
KG_100B_102	226	22835.7	1.46658	0.08797	0.0018043	2.822	0.083842	0.2338	0.00721907	0.9689	1352.17	39.6243	1361.4	31.5834	1381.83	28.9741	99	1381.83	28.9741
KG_100B_103	946	-133900	0.966292	0.08994	0.00181474	2.848	0.0925929	0.2309	0.00725851	0.98731	1332.39	40.0155	1368.28	33.3171	1424.26	28.9207	98	1424.26	28.9207
KG_100B_104	229.7	20830	1.15138	0.10525	0.00217567	4.29	0.131764	0.2979	0.00852688	0.97409	1675.98	44.9243	1691.44	39.3014	1718.69	35.7163	99	1718.69	35.7163
KG_100B_105	404.4	-768.75	2.20742	0.0485	0.0017032	0.0832	0.00334349	0.01249	0.000360555	0.65332	79.9266	2.26066	81.149	3.15165	123.73	63.4221	99	79.9266	2.26066
KG_100B_106	1664	2646	12.058	0.04749	0.00108283	0.0843	0.00269306	0.01287	0.000365862	0.90554	82.4539	2.36775	82.1796	2.51189	73.9379	24.9978	100	82.4539	2.36775
KG_100B_107	41.1	126.621	3.16154	0.0467	0.0030467	0.0984	0.00574744	0.01494	0.000608425	0.24804	95.7462	3.81972	95.2983	5.35087	33.9129	81.3938	100	95.7462	3.81972
KG_100B_11	143.5	19691.7	1.74362	0.09815	0.00208074	3.66	0.11993	0.2691	0.00806014	0.94942	1530.61	42.7878	1562.69	38.1856	1589.27	34.342	98	1589.27	34.342
KG_100B_110	124.8	21154.5	2.24259	0.1088	0.0022572	4.746	0.119745	0.3142	0.0079686	0.93817	1758.73	42.5648	1775.4	37.814	1779.42	36.9673	99	1779.42	36.9673
KG_100B_111	288.6	-4592.22	2.76702	0.09101	0.001875	3.028	0.0859565	0.2409	0.00680096	0.96191	1386.61	37.2846	1414.7	32.0278	1446.81	30.394	98	1446.81	30.394
KG_100B_112	274	-673.333	2.36207	0.0466	0.00159957	0.0779	0.00329202	0.01226	0.000304176	0.4537	78.6507	1.97988	76.1687	3.09914	28.7764	43.1685	103	78.6507	1.97988
KG_100B_113	165.2	-454.8	1.28161	0.0494	0.00171352	0.1548	0.00497948	0.02277	0.000505756	0.033899	145.054	3.22104	146.141	4.48435	166.86	64.8072	99	145.054	3.22104
KG_100B_114	189.7	5731.67	2.64759	0.10507	0.00216478	4.366	0.104277	0.2982	0.00676826	0.94053	1678.07	37.1641	1705.93	35.8478	1715.54	35.5229	99	1715.54	35.5229
KG_100B_115	245.6	709.667	2.03817	0.0478	0.00169527	0.0952	0.00363802	0.01442	0.000362732	0.49453	92.3003	2.31684	92.3359	3.35507	89.3818	60.2621	100	92.3003	2.31684
KG_100B_116	70.8	299.333	2.57267	0.0478	0.00249077	0.1391	0.00725462	0.02107	0.000500478	0.31796	134.572	3.18454	132.242	6.55881	89.3818	94.1531	102	134.572	3.18454
KG_100B_117	75.3	175.333	2.57965	0.0473	0.00248695	0.0765	0.00428263	0.01161	0.000276436	0.31753	74.4306	1.76599	74.849	4.08655	64.4002	70.8519	99	74.4306	1.76599
KG_100B_118	483.8	-2486.67	1.19752	0.04902	0.00122833	0.1739	0.00545312	0.02558	0.000619867	0.76806	162.886	3.93166	162.798	4.85396	148.788	36.5982	100	162.886	3.93166
KG_100B_119	97.8	-530.69	1.69204	0.0493	0.00171237	0.1789	0.00715836	0.02613	0.00061807	0.52863	166.3	3.93349	167.114	6.26621	162.123	68.2307	100	166.3	3.93349
KG_100B_12	621	2510	4.83268	0.0502	0.00121261	0.1391	0.00470951	0.01989	0.000593165	0.85487	126.697	3.77304	132.242	4.30842	204.264	33.3227	96	126.697	3.77304
KG_100B_120	630	785.714	1.01449	0.04805	0.00125683	0.0958	0.00249621	0.01445	0.000340472	0.46103	92.462	2.2042	92.892	2.38771	101.732	37.9546	100	92.462	2.2042
KG_100B_121	388.6	308.889	1.30359	0.0477	0.00145606	0.0788	0.0029553	0.01196	0.000311796	0.60864	76.6265	2.00993	77.0161	2.85219	84.4158	59.6777	100	76.6265	2.00993
KG_100B_122	477	-4663	2.02548	0.04869	0.00129919	0.1083	0.00346144	0.01622	0.00045567	0.66516	103.643	2.94989	104.409	3.25754	132.93	41.6889	99	103.643	2.94989
KG_100B_123	390	3241.18	1.79641	0.04902	0.00137215	0.1593	0.00495889	0.02333	0.000544165	0.60079	148.667	3.42483	150.09	4.53534	148.788	45.9557	99	148.667	3.42483
KG_100B_124	252	-5887.1	1.95956	0.0478	0.00153425	0.1585	0.00479676	0.02371	0.000689105	0.46983	151.304	4.33658	149.389	4.30529	89.3818	52.8904	101	151.304	4.33658
KG_100B_125	103.9	536.667	1.93916	0.0438	0.00182411	0.0941	0.00415114	0.01546	0.000430819	0.32603	99.4265	2.75732	91.3155	3.94836	-121.924	-78.7802	108	99.4265	2.75732
KG_100B_126	1563	-7752.94	29.435	0.04825	0.00109619	0.0922	0.00225618	0.01386	0.000298228	0.48932	88.6815	1.8958	89.5507	2.15624	111.545	25.2216	99	88.6815	1.8958
KG_100B_127	687	23650	6.53042	0.09076	0.00187015	3.01	0.070143	0.2372	0.00540976	0.90339	1366.3	30.2376	1410.16	29.6972	1441.57	30.3562	97	1441.57	30.3562
KG_100B_128	180.3	641250	1.7454	0.08921	0.00193932	3.01	0.0829038	0.2402	0.00651448	0.90367	1385.97	36.008	1410.16	32.4096	1408.67	32.4035	98	1408.67	32.4035
KG_100B_129	677	-2440	1.48237	0.04805	0.0012633	0.0795	0.00255501	0.01195	0.000305321	0.68731	76.5286	1.94421	77.6747	2.45567	101.732	38.9506	99	76.5286	1.94421
KG_100B_13	563	-77333.3	7.59784	0.04793	0.00128118	0.0903	0.0030036	0.01357	0.000404547	0.83743	86.8697	2.57411	87.7828	2.81629	95.8153	39.969	99	86.8697	2.57411
KG_100B_130	131.2	871.818	3.43455	0.0493	0.00231996	0.0847	0.00425202	0.01219	0.000321774	0.17046	77.935	2.02791	82.5541	3.96271	162.123	90.1267	95	77.935	2.02791
KG_100B_131	570	22466.7	168.142	0.08798	0.0017787	2.368	0.0560622	0.1945	0.00442064	0.9732	1130.9	25.088	1233	26.2517	1382.05	28.2225	93	1382.05	28.2225
KG_100B_132	225.2	505.25	1.45855	0.0492	0.00140295	0.0999	0.00312282	0.0147	0.000361298	0.27405	93.9163	2.34104	96.684	2.92874	157.373	47.4193	97	93.9163	2.34104
KG_100B_133	372	-1295	9.80496	0.04961	0.0013806	0.1603	0.00467316	0.02328	0.00062039	0.65193	148.239	3.94149	150.966	4.25724	176.762	45.8507	98	148.239	3.94149
KG_100B_134	71.5	484.167	1.03774	0.0456	0.00323137	0.0854	0.00652742	0.01353	0.000342526	0.42513	86.8717	2.17149	83.2092	6.13084	-23.4865	#DIV/0!	104	86.8717	2.17149
KG_100B_135	143	140.25	1.52128	0.0479	0.00258414	0.0862	0.00547834	0.01301	0.00038962	0.60634	83.3034	2.52707	83.9573	5.08832	94.3329	94.3518	99	83.3034	2.52707
KG_100B_136	462	-41000	5.12195	0.08829	0.00184362	2.862	0.0687053	0.2345	0.00522361	0.81584	1355.55	29.6392	1371.97	28.9361	1388.8	29.8743	99	1388.8	29.8743
KG_100B_137	74	752	4.88449	0.0503	0.00180611	0.2291	0.00747026	0.03365	0.000838409	0.44189	213.378	5.27534	209.455	6.44758	208.88	68.7146	102	213.378	5.27534
KG_100B_138	984	1140	1.29644	0.04887	0.00131518	0.0783	0.00246218	0.01167	0.000288748	0.81794	74.6643	1.85351	76.5454	2.36379	141.599	41.2714	98	74.6643	1.85351
KG_100B_139	137	-380.645	2.70751	0.0478	0.00221674	0.0932	0.00432256	0.01413	0.000434468	0.37298	90.4528	2.77269	90.4799	4.02851	89.3818	84.6964	100	90.4528	2.77269
KG_100B_14	116	-1658.18	1.30484	0.0507	0.00197944	0.1822	0.00824856	0.02604	0.000701522	0.62551	165.437	4.39673	169.952	7.24834	227.214	79.2953	98	165.437	4.39673
KG_100B_140	190.4	-3712	5.8387	0.05143	0.00131545	0.2259	0.00704076	0.03218	0.00087311	0.74315	203.858	5.50281	206.808	6.11224	260.149	38.2134	99	203.858	5.50281
KG_100B_141	117.8	293	2.19776	0.0514	0.00216027	0.2021	0.00968389	0.02868	0.000688053	0.32514	181.894	4.3553	186.902	8.29766	258.809	103.205	98	181.894	4.3553
KG_100B_15	167.1	1480	2.52799	0.049	0.00250008	0.0991	0.00575224	0.01473	0.000504865	0.526	94.131	3.20625	95.9452	5.35778	147.831	98.5983	98	94.131	3.20625
KG_100B_16	426	-7487.5	1.63846	0.09031	0.00186141	2.908	0.0941201	0.2324	0.0077488	0.97494	1340.16	41.6178	1383.99	33.5811	1432.09	30.1453	97	1432.09	30.1453
KG_100B_18	621	2036.67	3.0486	0.04848	0.00134351	0.1079	0.00353511	0.01605	0.000460371	0.69452	102.59	2.93581	104.043	3.33099	122.758	44.3416	99	102.59	2.93581
KG_100B_19	366.9	17633.3	0.590821	0.08961	0.00181881	2.99	0.0898056	0.2405	0.00708351	0.97456	1386.93	38.6814	1405.08	32.8503	1417.23	29.1258	99	1417.23	29.1258
KG_100B_2	324.9	24331.6	6.54908	0.08769	0.00178276	2.83	0.0839497	0.2332	0.00669275	0.97268	1349.29	38.0654	1363.52	31.6208	1375.7	28.5685	99	1375.7	28.5685
KG_100B_21	329.2	1242	5.33204	0.0475	0.00177553	0.0808	0.00340756	0.01231	0.00035807	0.64973	78.8798	2.31891	78.8968	3.21391	74.4384	62.3599	100	78.8798	2.31891
KG_100B_22	432	5583.33	2.344	0.04988	0.00128503	0.1721	0.0064037	0.0247	0.000754278	0.8942	157.156	4.77654	161.24	5.7009	189.405	38.6747	98	157.156	4.77654
KG_100B_23	65.3	318	3.60177	0.0507	0.00260542	0.2259	0.0107006	0.03232	0.00104414	0.29013	204.926	6.54135	206.808	9.56201	227.214	103.379	99	204.926	6.54135
KG_100B_24	341	-1600	1.62381	0.05094	0.00127705	0.1626	0.0060486	0.02315	0.000726615	0.8603	147.168	4.5671	152.976	5.441	238.116	35.6334	96	147.168	4.5671
KG_100B_26	85	430.286	2.39437	0.05924	0.00151863	0.479	0.0195135	0.0586	0.0023181	0.87974	364.625	13.9758	397.387	14.403	575.928	36.9583	92	364.625	13.9758
KG_100B_28	607	29775	1.42488	0.11172	0.0022754	4.99	0.223517	0.322	0.0145077	0.99062	1795.18	74.1046	1817.63	49.8082	1827.58	37.1973	99	1827.58	37.1973
KG_100B_3	121.3	-177.4	3.80967	0.0457	0.00229028	0.0762	0.00475106	0.01211	0.000385566	0.62593	77.7812	2.45903	74.566	4.55487	-18.1852	-327.335	104	77.7812	2.45903
KG_100B_30	845	3715	1.57649	0.04745	0.0011852	0.0954	0.00330613	0.01457	0.000440243	0.84801	93.2974	2.80918	92.5213	3.11078	71.9346	33.9996	101	93.2974	2.80918
KG_100B_31	91.8	153	2.02649	0.049	0.00187627	0.1721	0.00735509	0.02494	0.000706259	0.54888	158.848	4.43947	161.24	6.46334	147.831	73.4581	98	158.848	4.43947
KG_100B_32	254.4	-181.4	2.66387	0.0474	0.00160895	0.0773	0.0027713	0.01166	0.000300803	0.65175	74.7404	1.91729	75.6033	2.6696	69.4269	51.4127	99	74.7404	1.91729
KG_100B_33	171.2	-59100	1.869	0.0486	0.00170434	0.1147	0.00568352	0.01694	0.000555325	0.84382	108.23	3.53771	110.256	5.19373	128.579	63.3211	98	108.23	3.53771
KG_100B_34	143.6	191.429	1.53747	0.0471	0.00185671	0.1017	0.00521317	0.01536	0.00051232	0.58294	98.3741	3.26208	98.3444	4.91293	54.3003	61.9458	100	98.3741	3.26208
KG_100B_36	160	230.333	5.8309	0.0498	0.00155949	0.0989	0.00367729	0.01425	0.000459157	0.47309	90.9852	2.92855	95.7605	3.47687	185.669	57.2495	95	90.9852	2.92855
KG_100B_37	1036	-51900	10.8368	0.08933	0.00181866	2.991	0.0913205	0.2419	0.00710255	0.97899	1395.31	38.8207	1405.33	32.85	1411.25	29.1536	99	1411.25	29.1536
KG_100B_38	114.5	150900	2.13619	0.0495	0.00205429	0.1489	0.00634259	0.02184	0.000612939	0.16847	139.154	3.8756	140.94	5.65415	171.582	85.3402	99	139.154	3.8756
KG_100B_39	507	-74000	1.19238	0.10796	0.00219238	4.57	0.150844	0.306	0.00991435	0.97307	1714.89	51.0892	1743.81	41.2408	1765.27	35.8988	99	1765.27	35.8988
KG_100B_4	267	-372.5	1.31462	0.04729	0.00135478	0.0923	0.00360801	0.01374	0.000406835	0.55301	88.0247	2.59063	89.6437	3.41066	63.8966	43.5846	98	88.0247	2.59063
KG_100B_40	701	-1298.75	2.62744	0.04986	0.00114861	0.1669	0.0049832	0.0242	0.000688735	0.87801	154.003	4.3686	156.725	4.47977	188.472	27.329	98	154.003	4.3686
KG_100B_41	135	-139	4.08225	0.0467	0.00220734	0.0767	0.00447137	0.0117	0.000349794	0.32217	75.0626	2.195	75.0376	4.27415	33.9129	65.6176	100	75.0626	2.195
KG_100B_42	193.9	22771.4	3.0729	0.10125	0.00207883	3.82	0.142257	0.2746	0.00970371	0.9721	1554.85	51.268	1596.97	40.5791	1647.16	34.0726	98	1647.16	34.0726
KG_100B_44	209.5	287	4.41053	0.0484	0.00187003	0.0907	0.00412075	0.01367	0.00037729	0.62922	87.4546	2.36995	88.1552	3.83185	118.867	71.5611	99	87.4546	2.36995
KG_100B_45	1930	-2770	1.46768	0.04741	0.00111152	0.095	0.00298329	0.01435	0.000500469	0.90461	91.9	3.18406	92.1504	2.87089	69.9288	29.4236	100	91.9	3.18406
KG_100B_46	263.2	1185	9.83558	0.0476	0.0018618	0.0964	0.00382193	0.01469	0.00036704	0.47351	94.0441	2.34511	93.4478	3.61832	79.4346	65.599	101	94.0441	2.34511
KG_100B_47	240.4	-564.333	1.28832	0.0488	0.0016256	0.1557	0.00693808	0.02297	0.000820639	0.7325	146.431	5.20332	146.932	6.14886	138.233	59.5952	100	146.431	5.20332
KG_100B_48	675	-710	2.47888	0.04805	0.00130982	0.0909	0.00359376	0.01393	0.000495699	0.86164	89.15	3.15143	88.3414	3.39699	101.732	41.9389	101	89.15	3.15143
KG_100B_49	611	686.25	3.3388	0.04755	0.00126886	0.0965	0.00340072	0.01457	0.000425457	0.78327	93.2855	2.73489	93.5404	3.20402	76.9384	39.4856	100	93.2855	2.73489
KG_100B_5	95.42	103.857	2.44667	0.0494	0.00392634	0.0849	0.00652481	0.01266	0.000342068	0.17024	80.917	2.1378	82.7413	6.13052	166.86	166.893	98	80.917	2.1378
KG_100B_51	97.6	-160.222	2.33102	0.0481	0.00186693	0.1598	0.00815257	0.02427	0.000756316	0.6639	154.791	4.75142	150.528	7.25532	104.191	69.4916	103	154.791	4.75142
KG_100B_52	490	3284.62	8.59649	0.0479	0.00161486	0.0934	0.00423431	0.01429	0.000593365	0.77607	91.4605	3.77182	90.6657	3.94067	94.3329	59.239	101	91.4605	3.77182
KG_100B_53	311	537.778	2.45075	0.04838	0.00124284	0.1683	0.00492848	0.02534	0.000671153	0.63523	161.502	4.277	157.943	4.49709	117.892	38.6919	102	161.502	4.277
KG_100B_54	423	14700	3.30469	0.10636	0.00223941	4.25	0.139014	0.2898	0.0088591	0.94915	1628.35	46.1974	1683.74	39.691	1737.94	36.7719	97	1737.94	36.7719
KG_100B_55	186.6	-652	3.05401	0.049	0.00204949	0.1583	0.00925816	0.02342	0.000944351	0.85664	149.24	5.99695	149.214	8.16558	147.831	80.1297	100	149.24	5.99695
KG_100B_56	111.5	538.75	1.9459	0.0475	0.00169189	0.0837	0.00378976	0.01275	0.000417043	0.64028	81.6873	2.6604	81.6176	3.59291	74.4384	59.5693	100	81.6873	2.6604
KG_100B_57	325.2	-2031.58	2.31789	0.0489	0.0014719	0.1313	0.00529678	0.01945	0.000610099	0.82948	124.117	3.89231	125.265	4.60851	143.039	52.4586	99	124.117	3.89231
KG_100B_58	1162	3610	0.914241	0.04854	0.00108745	0.1019	0.00370991	0.01514	0.000485889	0.92006	96.7947	3.08142	98.5287	3.50686	125.671	25.0687	98	96.7947	3.08142
KG_100B_59	297.4	-341.875	2.65299	0.04697	0.00129405	0.099	0.00326809	0.01507	0.00040465	0.70359	96.542	2.57423	95.8528	3.07074	47.702	37.6233	101	96.542	2.57423
KG_100B_60	122	382.273	2.28464	0.0495	0.0027821	0.0755	0.00362906	0.01127	0.000359451	0.14006	72.0568	2.30111	73.9053	3.43456	171.582	111.077	98	72.0568	2.30111
KG_100B_61	113.6	1197	5.55501	0.0497	0.0021443	0.1177	0.00635227	0.0175	0.000626817	0.79732	111.631	3.98017	112.985	6.59424	180.987	89.5265	99	111.631	3.98017
KG_100B_62	661	716.25	1.55164	0.04866	0.00115932	0.0964	0.00331771	0.01439	0.000430382	0.92344	92.0084	2.7163	93.4478	3.1224	131.481	31.4632	99	92.0084	2.7163
KG_100B_63	1039	2080	2.13522	0.04754	0.00112429	0.0866	0.00312407	0.01326	0.00040796	0.85888	84.9361	2.6247	84.3312	2.9341	76.4387	28.8292	101	84.9361	2.6247
KG_100B_65	429	49583.3	1.3323	0.08813	0.00184056	2.72	0.0926518	0.2243	0.00694364	0.97548	1298.41	38.1005	1333.93	33.3513	1385.32	29.8111	98	1385.32	29.8111
KG_100B_66	142	2978.89	1.61916	0.10506	0.00223442	4.44	0.14137	0.3079	0.0096271	0.97213	1732.42	50.7281	1719.83	39.7935	1715.37	36.6887	101	1715.37	36.6887
KG_100B_67	93	7805	1.20936	0.10976	0.00226305	4.203	0.116043	0.2775	0.00753741	0.94366	1552.95	40.2415	1674.61	37.1202	1795.43	37.0687	94	1795.43	37.0687
KG_100B_69	76.6	233	2.37372	0.0484	0.0029626	0.1326	0.00711288	0.02002	0.000538442	-0.14508	127.812	3.43881	126.431	6.42037	118.867	118.891	101	127.812	3.43881
KG_100B_7	221	-218571	0.809524	0.08818	0.00181526	2.759	0.107279	0.2262	0.00833466	0.98743	1309.02	45.2113	1344.52	36.7357	1386.41	29.2786	98	1386.41	29.2786
KG_100B_70	111.5	-10815.8	2.71224	0.10646	0.00227807	4.42	0.149045	0.302	0.00947479	0.96562	1696.08	49.3881	1716.09	40.7682	1739.67	37.5063	99	1739.67	37.5063
KG_100B_71	154.6	423.667	1.85594	0.0495	0.0027821	0.088	0.00587006	0.01325	0.00045511	0.52565	84.6606	2.93164	85.6386	5.48282	171.582	111.077	99	84.6606	2.93164
KG_100B_72	383.7	51000	2.64621	0.08833	0.00184729	2.912	0.0957491	0.24	0.00768375	0.96414	1386.45	41.5995	1385.03	33.0072	1389.67	30.2756	100	1389.67	30.2756
KG_100B_73	415	613	1.95755	0.0492	0.00147589	0.1698	0.00733368	0.02479	0.000899065	0.84864	157.86	5.66098	159.245	6.44372	157.373	52.552	99	157.86	5.66098
KG_100B_74	202.4	8915	2.10833	0.10397	0.00211033	4.12	0.13744	0.2886	0.00907282	0.98296	1626.98	47.6794	1658.28	39.2569	1696.17	34.5034	99	1696.17	34.5034
KG_100B_75	189.4	-34000	2.80012	0.10388	0.0021301	4.177	0.113613	0.2925	0.00763102	0.97	1648.94	40.744	1669.52	36.6068	1694.57	34.8931	99	1694.57	34.8931
KG_100B_76	257.7	528.25	4.30936	0.0509	0.00165116	0.0922	0.00360698	0.01333	0.000497469	0.7252	85.0174	3.18323	89.5507	3.40988	236.304	58.7527	95	85.0174	3.18323
KG_100B_77	210.3	-5316	2.14373	0.08732	0.00182505	2.467	0.0674569	0.2044	0.00544718	0.95308	1187.68	30.306	1262.42	28.4005	1367.57	29.4731	95	1367.57	29.4731
KG_100B_78	325.6	6356.25	5.43029	0.0885	0.00180427	3.096	0.0942077	0.2568	0.00868208	0.98587	1480.87	46.7662	1431.7	33.8264	1393.36	28.8588	103	1393.36	28.8588
KG_100B_79	1255	-1328.75	1.42776	0.04734	0.00103176	0.0893	0.00291201	0.01384	0.000438427	0.92602	88.6567	2.74948	86.8511	2.80409	66.4127	20.1688	102	88.6567	2.74948
KG_100B_8	267.8	651.333	3.42894	0.047	0.0017702	0.0784	0.00303622	0.01213	0.00034836	0.39041	77.7805	2.23276	76.6396	2.84875	49.2271	58.9049	101	77.7805	2.23276
KG_100B_80	196.4	11100	2.32151	0.10854	0.00220918	4.17	0.138042	0.278	0.00974236	0.9773	1558.3	48.5445	1668.15	39.4228	1775.06	36.1656	95	1775.06	36.1656
KG_100B_81	56.2	-7816.67	1.06218	0.09956	0.00220621	3.725	0.0969239	0.2751	0.00828927	0.89349	1561.19	44.639	1576.76	34.1119	1615.88	36.9969	99	1615.88	36.9969
KG_100B_82	246	-22000	2.3384	0.10604	0.00217894	4.28	0.155651	0.2937	0.0109153	0.97834	1650.76	56.4361	1689.52	42.6593	1732.42	35.7241	98	1732.42	35.7241
KG_100B_83	539	2305	2.78986	0.04824	0.00133313	0.0928	0.00258549	0.01391	0.000424023	0.71264	89.0011	2.75113	90.1084	2.47757	111.056	44.8849	99	89.0011	2.75113
KG_100B_84	209.3	1237.5	2.02614	0.0471	0.00168741	0.0751	0.002747	0.01171	0.000357421	0.63345	75.0883	2.26813	73.5276	2.64443	54.3003	56.9812	102	75.0883	2.26813
KG_100B_85	88.3	-2458.33	1.53565	0.09938	0.00216568	3.69	0.118724	0.271	0.0086178	0.96435	1538.68	45.7556	1569.21	37.2234	1612.51	36.0032	99	1612.51	36.0032
KG_100B_86	242	-1881.82	1.68289	0.0486	0.00170434	0.0905	0.00308644	0.01398	0.000402835	0.42937	89.4059	2.53585	87.969	2.97512	128.579	76.9605	102	89.4059	2.53585
KG_100B_87	72.1	-1082.5	2.19149	0.0614	0.00178829	0.825	0.0451248	0.0981	0.00409993	0.89691	602.189	24.184	610.834	26.071	653.276	48.8709	99	602.189	24.184
KG_100B_88	444	8158.82	1.64994	0.05398	0.00120268	0.378	0.0125361	0.051	0.00157493	0.90713	320.183	9.85802	325.565	10.0924	370.215	23.2247	98	320.183	9.85802
KG_100B_89	363.9	31040	2.17124	0.0509	0.00181282	0.096	0.00347799	0.01386	0.000386962	0.52924	88.3823	2.44824	93.0773	3.27899	236.304	72.0737	95	88.3823	2.44824
KG_100B_9	167.4	-861.333	2.55573	0.0504	0.00206302	0.1761	0.0078361	0.02554	0.000842506	0.4795	162.349	5.30362	164.699	6.93579	213.483	82.8475	99	162.349	5.30362
KG_100B_90	582	-13433.3	6.35371	0.09289	0.00191881	2.89	0.115503	0.2274	0.00843174	0.98262	1307.65	45.0275	1379.31	38.6183	1485.65	31.3191	96	1485.65	31.3191
KG_100B_91	1417	-3466.67	52.3845	0.04767	0.0010191	0.0784	0.00238718	0.01201	0.000325724	0.92077	76.9485	2.07986	76.6396	2.28799	82.923	18.0596	100	76.9485	2.07986
KG_100B_92	372.5	-74714.3	1.29791	0.04912	0.00130565	0.1555	0.00555267	0.02327	0.000690433	0.76772	148.269	4.36223	146.757	4.96259	153.563	40.5278	101	148.269	4.36223
KG_100B_93	135.9	9587.5	2.17093	0.10313	0.00220164	3.89	0.134732	0.2754	0.0102126	0.97555	1555.35	52.7914	1611.61	39.6185	1681.2	36.4228	97	1681.2	36.4228
KG_100B_94	154.1	896.316	3.49275	0.0479	0.00195135	0.1193	0.00527096	0.01822	0.000571303	0.43418	116.463	3.64334	114.437	4.78433	94.3329	72.8756	102	116.463	3.64334
KG_100B_95	139	-171.429	1.58658	0.0535	0.00281156	0.1035	0.00653643	0.01421	0.000450854	0.61708	90.3027	2.83336	100.002	6.0462	350.061	116.897	91	90.3027	2.83336
KG_100B_96	460	47000	1.42415	0.04737	0.00120833	0.0892	0.00349037	0.0136	0.000459221	0.82281	87.1229	2.96634	86.7579	3.29564	67.9205	34.4792	100	87.1229	2.96634
KG_100B_97	522	9640	1.69756	0.10839	0.00223896	4.53	0.142507	0.303	0.00979865	0.9647	1697.15	50.8218	1736.5	40.0799	1772.53	36.676	98	1772.53	36.676
KG_100B_98	792	-23900	8.76106	0.10856	0.00226641	3.723	0.116809	0.2483	0.00697647	0.94864	1395.05	37.0692	1576.33	36.8175	1775.39	37.1734	91	1775.39	37.1734
KG_100B_99	302.6	2807	1.91156	0.0483	0.00178414	0.1019	0.00370991	0.01537	0.000553258	0.59588	98.2877	3.50072	98.5287	3.50443	113.989	65.7283	100	98.2877	3.50072
SK15-61A: Spider Glacier
SK15_61A_1	68.5	108.667	1.77599	0.0449	0.0025625	0.1528	0.01017	0.02454	0.000830533	0.60306	157.134	5.26359	144.381	8.98163	-61.0777	-203.596	108.245	157.134	5.26359
SK15_61A_3	89.7	96.6667	3.58657	0.0471	0.00239319	0.109	0.00704574	0.01673	0.000609965	0.69356	107.1	3.85571	105.05	6.45444	54.3003	79.761	101.814	107.1	3.85571
SK15_61A_5	717	9630	1.17734	0.04819	0.00110477	0.1548	0.00459839	0.0233	0.000640902	0.84986	148.634	4.08545	146.141	4.11797	108.607	26.2363	101.599	148.634	4.08545
SK15_61A_6	503	6272.73	0.980507	0.0486	0.00107535	0.1588	0.00510754	0.02364	0.000710239	0.85843	150.708	4.47109	149.652	4.60618	128.579	22.2486	100.647	150.708	4.47109
SK15_61A_8	600	4545	2.20507	0.04929	0.00110991	0.1784	0.00558754	0.02607	0.000905239	0.9003	165.924	5.754	166.683	4.98	161.649	25.3081	99.5332	165.924	5.754
SK15_61A_9	331.1	237.222	501.667	0.0468	0.00168407	0.0724	0.00297602	0.01103	0.000356461	0.57544	70.771	2.29127	70.9744	2.87716	39.0335	52.8636	99.6341	70.771	2.29127
SK15_61A_10	30.6	-45.1375	2.13986	0.0541	0.0032834	0.1537	0.00969997	0.02081	0.000713878	0.30754	131.859	4.52234	145.174	8.70811	375.215	135.702	91.4582	131.859	4.52234
SK15_61A_11	42.8	49.8571	2.87441	0.0531	0.0052094	0.102	0.010206	0.01409	0.000573944	0.24589	89.5896	3.64861	98.6208	9.96166	333.072	205.829	91.4574	89.5896	3.64861
SK15_61A_12	713	7164.29	3.36321	0.04838	0.00119426	0.1617	0.00562306	0.02425	0.000771508	0.79685	154.609	4.90122	152.19	5.02829	117.892	34.3404	101.492	154.609	4.90122
SK15_61A_13	229	1586.67	4.67347	0.0509	0.00157363	0.1269	0.00707117	0.01809	0.000658331	0.89334	115.196	4.18002	121.308	6.47693	236.304	54.7361	95.2724	115.196	4.18002
SK15_61A_14	298.6	3586.67	1.33781	0.0497	0.00155822	0.1687	0.00653788	0.02471	0.000668381	0.80268	157.255	4.20917	158.29	5.83607	180.987	55.0253	99.409	157.255	4.20917
SK15_61A_16	497.2	2176.5	2.40891	0.0486	0.00146792	0.1009	0.00378316	0.01511	0.000447465	0.74762	96.5965	2.85183	97.6068	3.5794	128.579	49.2886	99.0472	96.5965	2.85183
SK15_61A_17	252.6	-582.8	3.11084	0.051	0.00181395	0.1391	0.00554793	0.02018	0.000568237	0.49628	128.401	3.57856	132.242	5.04945	240.83	69.8532	97.3923	128.401	3.57856
SK15_61A_18	94.2	-77.5	247.895	0.048	0.00362927	0.0745	0.00474026	0.01122	0.000351077	-0.36312	71.8756	2.22587	72.9608	4.44958	99.2691	148.917	98.5817	71.8756	2.22587
SK15_61A_19	388	427.5	92.381	0.0478	0.00177875	0.0772	0.00391713	0.0116	0.000403391	0.87773	74.3195	2.57326	75.509	3.72067	89.3818	68.0755	98.4624	74.3195	2.57326
SK15_61A_20	849	1138.75	5.47742	0.04856	0.00112108	0.1242	0.00437381	0.0185	0.000552268	0.87689	118.143	3.51234	118.873	4.0666	126.641	27.4714	99.4081	118.143	3.51234
SK15_61A_21	510	-432.857	113.333	0.0473	0.00120724	0.0671	0.00347001	0.01055	0.000461108	0.89098	67.659	2.92966	65.9437	3.37078	64.4002	34.1759	102.593	67.659	2.92966
SK15_61A_23	60.4	444.5	2.23953	0.0498	0.00223428	0.178	0.0103326	0.02603	0.000864364	0.68183	165.564	5.42441	166.338	8.94829	185.669	90.3177	99.5884	165.564	5.42441
SK15_61A_24	392.5	617.571	2.44548	0.04955	0.00122494	0.1295	0.0047653	0.01906	0.000574642	0.85886	121.543	3.63048	123.648	4.36872	173.938	34.5587	98.4343	121.543	3.63048
SK15_61A_25	183.9	2439.58	171.869	0.0496	0.0022325	0.0777	0.00355738	0.01112	0.000334607	0.30091	71.0922	2.13699	75.9802	3.4517	176.291	92.8519	93.825	71.0922	2.13699
SK15_61A_26	236	523.333	27.1264	0.0512	0.0022469	0.0823	0.00460427	0.01183	0.000422468	0.72315	75.4591	2.74229	80.305	4.31063	249.844	90.6165	94.4069	75.4591	2.74229
SK15_61A_27	116.6	320.4	2.04203	0.0497	0.00196927	0.1623	0.00647275	0.02385	0.000648945	0.36656	151.824	4.12819	152.714	5.77708	180.987	79.7165	99.4943	151.824	4.12819
SK15_61A_28	556	5487.5	1.30978	0.04824	0.00131941	0.0916	0.00309939	0.01389	0.000487004	0.76673	88.8737	3.06687	88.9928	2.9878	111.056	43.0789	99.9233	88.8737	3.06687
SK15_61A_29	264	-44937.5	2.30971	0.05125	0.00137732	0.1664	0.00505129	0.02346	0.000678416	0.76015	149.065	4.29446	156.29	4.54524	252.09	37.1873	95.6467	149.065	4.29446
SK15_61A_30	127.6	271	123.883	0.0471	0.00194354	0.0722	0.00369393	0.0112	0.000358575	0.60029	71.8303	2.3036	70.785	3.49855	54.3003	63.7906	101.432	71.8303	2.3036
SK15_61A_31	206.7	472.333	2.10061	0.0498	0.00148392	0.1648	0.00711011	0.02405	0.000816677	0.8341	153.067	5.11398	154.896	6.31543	185.669	49.5837	98.9059	153.067	5.11398
SK15_61A_32	376.7	357.857	438.023	0.05	0.00164012	0.0778	0.00286027	0.0114	0.000361087	0.54614	72.8383	2.31063	76.0745	2.67664	194.993	62.7244	96.0551	72.8383	2.31063
SK15_61A_33	240	312.857	7.84314	0.0494	0.0015544	0.1087	0.0047293	0.01595	0.000535407	0.74672	101.834	3.45871	104.776	4.34189	166.86	55.0428	97.3595	101.834	3.45871
SK15_61A_34	148.5	-979	97.0588	0.0481	0.00186693	0.0755	0.00353837	0.01145	0.000339029	0.59788	73.3341	2.16946	73.9053	3.34456	104.191	72.162	99.3055	73.3341	2.16946
SK15_61A_35	134.4	1180	2.43038	0.048	0.0018659	0.1018	0.00448835	0.01521	0.000400172	0.3031	97.3069	2.51949	98.4365	4.19238	99.2691	68.457	98.8574	97.3069	2.51949
SK15_61A_36	171.2	468.2	2.18646	0.05	0.00164012	0.1625	0.00579677	0.02414	0.000608273	0.52826	153.597	3.83573	152.889	5.19717	194.993	70.3058	100.575	153.597	3.83573
SK15_61A_37	154.1	-214.333	2.13435	0.0504	0.00251119	0.099	0.00547087	0.0145	0.000439318	0.30628	92.5029	2.79366	95.8528	5.07833	213.483	130.532	96.817	92.5029	2.79366
SK15_61A_38	195.3	154.556	1.87069	0.0489	0.00187523	0.0819	0.00324392	0.01225	0.000379638	0.69563	78.357	2.38414	79.9297	3.05295	143.039	91.4959	98.1973	78.357	2.38414
SK15_61A_39	179.8	-566.75	3.4845	0.0514	0.00288908	0.1541	0.00922977	0.02205	0.000720681	0.26049	140.143	4.55323	145.526	8.23793	258.809	124.336	96.6146	140.143	4.55323
SK15_61A_40	158	-417.75	1.70259	0.0488	0.00154679	0.1243	0.00540557	0.0182	0.000498092	0.64554	116.203	3.19893	118.963	4.91634	138.233	56.1627	97.7362	116.203	3.19893
SK15_61A_41	85.4	575	2.93471	0.0516	0.00216218	0.1675	0.00695935	0.02346	0.000777527	0.43996	148.999	4.89987	157.247	6.16421	267.725	83.8996	95.0646	148.999	4.89987
SK15_61A_42	549	-3080	2.78539	0.0484	0.00112846	0.1282	0.0039464	0.01928	0.000534404	0.83876	123.118	3.36967	122.479	3.6469	118.867	28.3057	100.51	123.118	3.36967
SK15_61A_43	155.7	-30777.8	2.70783	0.0557	0.001497	0.466	0.0193872	0.0603	0.00200361	0.80354	376.711	12.5144	388.422	14.306	440.43	43.1418	97.1751	376.711	12.5144
SK15_61A_44	141	1218.18	1.5	0.0519	0.00199184	0.1176	0.00472672	0.01659	0.000496982	0.49963	105.561	3.1873	112.894	4.33434	281.007	76.1001	93.9542	105.561	3.1873
SK15_61A_45	66.5	819.531	2.42082	0.0521	0.00243429	0.194	0.0107263	0.02711	0.000838797	0.34314	171.87	5.26474	180.037	9.34709	289.801	99.5001	95.778	171.87	5.26474
SK15_61A_46	115.5	1575	1.79907	0.0502	0.00206107	0.1609	0.00871582	0.02359	0.000877608	0.4557	150.086	5.57111	151.491	7.63141	204.264	84.5141	99.2173	150.086	5.57111
SK15_61A_47	153.5	196.857	2.54645	0.0482	0.0022202	0.1031	0.00513243	0.01548	0.000467282	0.45609	99.0002	2.9598	99.6339	4.7406	109.097	86.7208	99.3899	99.0002	2.9598
SK15_61A_48	223.6	4643.66	1.91767	0.05	0.00141421	0.1745	0.00460218	0.02534	0.000777783	0.5267	161.17	4.90492	163.317	4.17497	194.993	48.904	98.7754	161.17	4.90492
SK15_61A_49	199	2615.45	3.8716	0.0503	0.00188998	0.1722	0.00954312	0.02467	0.000769119	0.87518	156.882	4.84736	161.326	8.35425	208.88	73.1759	97.3821	156.882	4.84736
SK15_61A_51	147.9	-95.1	128.609	0.0487	0.00249773	0.0733	0.00307232	0.01098	0.000355843	0.24099	70.2811	2.28141	71.8262	2.97128	133.413	98.6024	98.0086	70.2811	2.28141
SK15_61A_52	166	-2220	3.29365	0.0488	0.00170663	0.1552	0.00571619	0.023	0.000590339	0.34853	146.621	3.727	146.493	5.20553	138.233	67.1103	100.065	146.621	3.727
SK15_61A_53	60.5	446	2.91426	0.0492	0.00315725	0.1268	0.00753932	0.01889	0.000550212	0.3953	120.52	3.54257	121.218	6.84964	157.373	136.426	99.5204	120.52	3.54257
SK15_61A_54	128	-1045.45	2.21071	0.0511	0.00198355	0.1103	0.00583322	0.01578	0.000471278	0.69712	100.536	2.973	106.24	5.43447	245.343	75.098	95.0022	100.536	2.973
SK15_61A_56	234.2	1639.38	1.5932	0.0505	0.00189211	0.1351	0.00568338	0.01914	0.000518687	0.39582	121.903	3.28034	128.67	5.09641	218.073	74.5412	94.9859	121.903	3.28034
SK15_61A_57	123	187.5	2.61702	0.05	0.00269258	0.1082	0.00581746	0.01565	0.000598389	0.26761	99.8525	3.76532	104.317	5.33076	194.993	112.958	95.9619	99.8525	3.76532
SK15_61A_58	231.7	748.6	1.70619	0.05145	0.00134749	0.1947	0.00723694	0.0276	0.000772207	0.84931	175.094	4.87542	180.632	6.33487	261.042	39.6528	97.1646	175.094	4.87542
SK15_61A_59	106.1	-188	258.78	0.0488	0.00259086	0.0793	0.00357147	0.01215	0.000520239	0.55123	77.7299	3.28483	77.4866	3.46889	138.233	98.7766	100.471	77.7299	3.28483
SK15_61A_60	165.4	1177.27	1.60583	0.0496	0.00214338	0.0943	0.00487924	0.01355	0.000427014	0.5423	86.5578	2.71704	91.5011	4.58142	176.291	85.4923	94.8211	86.5578	2.71704
SK15_61A_61	170.9	382.833	1.51911	0.0479	0.0015355	0.1575	0.0057413	0.02338	0.000800718	0.58598	149.195	5.07521	148.512	5.14445	94.3329	69.0499	100.316	149.195	5.07521
SK15_61A_62	264	287.5	5.82781	0.04834	0.00130062	0.1025	0.00371652	0.01504	0.000566463	0.77158	96.183	3.64789	99.0814	3.51435	115.942	41.0451	97.1244	96.183	3.64789
SK15_61A_63	144.4	11675	117.398	0.0474	0.0022133	0.0719	0.00332684	0.0109	0.000331699	0.27101	69.8865	2.1243	70.5009	3.13502	69.4269	83.3239	99.1275	69.8865	2.1243
SK15_61A_64	148.2	1045	2.69945	0.0485	0.00195727	0.162	0.00646974	0.02411	0.000639466	0.42982	153.7	4.09371	152.452	5.77262	123.73	77.1173	100.739	153.7	4.09371
SK15_61A_65	178.2	688.824	89.1	0.0482	0.00186797	0.0763	0.0038182	0.01115	0.000440601	0.75616	71.4107	2.79024	74.6603	3.62051	109.097	71.7545	95.7399	71.4107	2.79024
SK15_61A_66	587	-1121.43	1.94952	0.04933	0.00122731	0.156	0.00499444	0.02265	0.000667315	0.8149	144.308	4.23412	147.196	4.49733	163.545	35.7035	98.0886	144.308	4.23412
SK15_61A_67	119	-292.5	2.63858	0.0489	0.0024993	0.173	0.0104872	0.0256	0.000899858	0.59335	163.038	5.72125	162.019	9.19614	143.039	102.211	100.575	163.038	5.72125
SK15_61A_68	245	268.75	1.57051	0.0514	0.00165734	0.1061	0.00479509	0.01503	0.000541166	0.75956	95.745	3.38125	102.392	4.40467	258.809	58.0825	93.9225	95.745	3.38125
SK15_61A_69	243	2168.75	2.46201	0.0492	0.00155186	0.1662	0.00625611	0.02417	0.000681231	0.65951	153.943	4.29934	156.116	5.55996	157.373	56.9444	98.617	153.943	4.29934
SK15_61A_70	153.9	-17557.1	1.98069	0.0487	0.00204663	0.0936	0.00468982	0.01372	0.000413999	0.48311	87.7395	2.65795	90.8514	4.39542	133.413	82.1436	96.6893	87.7395	2.65795
SK15_61A_72	65.2	61.625	2.52713	0.051	0.00233461	0.0913	0.00608065	0.01303	0.000469055	0.70059	83.1017	2.99213	88.7137	5.6906	240.83	95.2135	94.0715	83.1017	2.99213
SK15_61A_73	27.93	381.6	155.167	0.05	0.00490306	0.0814	0.00885101	0.01167	0.000480495	0.10785	74.5567	3.07671	79.4603	8.2705	194.993	205.863	94.1276	74.5567	3.07671
SK15_61A_74	141.8	-505	3.45854	0.0503	0.00180611	0.1658	0.0077457	0.02416	0.00073965	0.6085	153.664	4.65377	155.767	6.85183	208.88	70.0943	98.7971	153.664	4.65377
SK15_61A_75	147.9	1089.94	3.84056	0.0529	0.00183558	0.1568	0.00624456	0.02134	0.000612991	0.54198	135.402	3.88501	147.898	5.55598	324.51	64.416	92.0357	135.402	3.88501
SK15_61A_76	101.4	-1037.69	2.54135	0.0479	0.0022176	0.1516	0.00818248	0.02324	0.000600366	0.55503	148.308	3.81764	143.324	7.28845	94.3329	83.1464	103.333	148.308	3.81764
SK15_61A_77	70.8	471	442.5	0.0489	0.00315539	0.0779	0.00410699	0.01125	0.00045025	0.39844	71.9845	2.88144	76.1687	3.90769	143.039	132.853	94.681	71.9845	2.88144
SK15_61A_78	297.3	1080	2.45297	0.04936	0.00118198	0.1708	0.00549173	0.02499	0.000679264	0.77659	159.091	4.305	160.113	4.96959	164.967	31.3568	99.3773	159.091	4.305
SK15_61A_79	215	-435714	4.15861	0.04975	0.00139658	0.1615	0.00514129	0.02383	0.000782015	0.61235	151.688	4.93874	152.015	4.63637	183.33	46.7361	99.8691	151.688	4.93874
SK15_61A_80	235.7	19416.7	4.07785	0.0495	0.0014799	0.1734	0.00625036	0.02526	0.000863265	0.86123	160.767	5.44891	162.365	5.55079	171.582	49.575	99.0444	160.767	5.44891
SK15_61A_81	213	167	1.27545	0.0488	0.00139735	0.0907	0.00359174	0.01337	0.000409393	0.6189	85.5002	2.55455	88.1552	3.39264	138.233	48.5109	97.1212	85.5002	2.55455
SK15_61A_82	234.8	2933	2.29297	0.05	0.00141421	0.1481	0.00581149	0.02125	0.000687186	0.84046	135.335	4.34258	140.233	5.30336	194.993	46.6384	96.6614	135.335	4.34258
SK15_61A_83	188	400	1.94416	0.0485	0.001622	0.1689	0.00741423	0.02508	0.000694264	0.75482	159.834	4.38564	158.464	6.52384	123.73	61.9144	100.769	159.834	4.38564
SK15_61A_84	165.7	544	180.109	0.0487	0.00204663	0.0746	0.00417565	0.01107	0.000422632	0.69033	70.855	2.69752	73.0553	3.98065	133.413	82.9207	97.1452	70.855	2.69752
SK15_61A_85	126.7	-186.4	1.99528	0.0506	0.00180946	0.1737	0.00955399	0.02472	0.00082464	0.73946	157.138	5.16052	162.625	8.36421	222.65	72.3205	96.798	157.138	5.16052
SK15_61A_86	73.9	-402.5	2.65827	0.0501	0.00260077	0.1298	0.00502287	0.01848	0.000530098	0.0027993	117.785	3.3598	123.918	4.62133	199.635	109.872	95.2585	117.785	3.3598
SK15_61A_87	184.3	751.818	2.67878	0.0477	0.00230654	0.1013	0.00576755	0.01535	0.0005122	0.54953	98.2355	3.2596	97.9756	5.3691	84.4158	87.246	100.23	98.2355	3.2596
SK15_61A_89	269.5	549.25	2.13043	0.04718	0.00123064	0.0899	0.00384614	0.0138	0.000437922	0.89526	88.4197	2.82495	87.4102	3.64673	58.3477	36.6095	101.078	88.4197	2.82495
SK15_61A_90	355.5	958.333	2.2191	0.0492	0.00128088	0.0941	0.00354146	0.01375	0.000399656	0.83029	87.8744	2.51387	91.3155	3.34336	157.373	39.4689	96.4067	87.8744	2.51387
SK15_61A_91	116.1	-964.167	2.96931	0.0494	0.00196625	0.116	0.00445223	0.01713	0.000606114	0.51885	109.326	3.87148	111.439	4.15043	166.86	76.3806	98.2526	109.326	3.87148
SK15_61A_93	203.3	-3564	1.96046	0.0478	0.00145737	0.0984	0.00334111	0.015	0.000403609	0.45533	95.9944	2.5643	95.2983	3.14364	89.3818	50.5518	100.713	95.9944	2.5643
SK15_61A_94	410	3800	1.75214	0.04906	0.00124726	0.1611	0.00468415	0.02331	0.000775721	0.69343	148.533	4.90321	151.666	4.26717	150.699	37.5432	97.94	148.533	4.90321
SK15_61A_95	170	-507.5	2.77778	0.05045	0.0012939	0.1414	0.00548521	0.02031	0.000783517	0.80169	129.314	4.92452	134.29	4.98507	215.779	38.5582	96.5186	129.314	4.92452
SK15_61A_96	162.6	445.2	2.17671	0.0493	0.00187941	0.1588	0.00777798	0.02343	0.000927139	0.73028	149.246	5.90771	149.652	6.88659	162.123	72.9364	99.7628	149.246	5.90771
SK15_61A_97	204	229.4	2.11838	0.0532	0.00167991	0.1395	0.00661695	0.01895	0.000787236	0.82706	120.285	4.99191	132.598	6.24035	337.336	56.2898	91.2654	120.285	4.99191
SK15_61A_98	273.4	373.167	1.98548	0.0491	0.00155059	0.0923	0.00302782	0.01367	0.000413337	0.54322	87.3766	2.57948	89.6437	2.91711	152.609	55.6698	97.6372	87.3766	2.57948
SK15_61A_99	201.1	2842	2.13936	0.04875	0.00137533	0.162	0.00546421	0.02386	0.000698441	0.62848	152.07	4.41584	152.452	4.87305	135.825	45.6936	99.7067	152.07	4.41584
SK15_61A_100	270.9	439	1.71347	0.04848	0.00123815	0.1297	0.00599073	0.01914	0.000720164	0.84439	122.217	4.60314	123.828	5.49483	122.758	37.3109	98.7001	122.217	4.60314
SK15_61A_101	266	-477.5	2.08138	0.0496	0.00140857	0.1674	0.00635367	0.02408	0.000777199	0.78871	153.296	4.95875	157.16	5.65567	176.291	47.7493	97.6013	153.296	4.95875
SK15_61A_102	274.5	-516.625	1.79178	0.04978	0.00130262	0.1761	0.0058732	0.0255	0.000772334	0.77815	162.225	4.84507	164.699	5.25929	184.734	39.7578	98.5571	162.225	4.84507
SK15_61A_103	221	2155.83	1.62381	0.0496	0.00171583	0.1346	0.00490478	0.01962	0.000582132	0.5727	125.084	3.67739	128.223	4.50236	176.291	75.7969	97.6846	125.084	3.67739
SK15_61A_104	267.4	2438.46	3.19474	0.0481	0.00161723	0.1343	0.00441187	0.01969	0.00059049	0.29762	125.767	3.90346	127.954	4.02083	104.191	57.4886	98.2355	125.767	3.90346
SK15_61A_105	147.9	-292.571	3.28667	0.0504	0.00156718	0.1633	0.00648281	0.02332	0.000759953	0.71575	148.343	4.81584	153.588	5.78559	213.483	56.3417	96.7554	148.343	4.81584
SK15_61A_106	82	-758	3.45992	0.0516	0.00207486	0.1677	0.0100747	0.02343	0.000850697	0.88671	148.81	5.38284	157.421	8.88305	267.725	84.6058	94.8395	148.81	5.38284
SK15_61A_107	241.3	-2070.62	1.66299	0.0514	0.00190178	0.1652	0.00590986	0.02305	0.000658347	0.63478	146.452	4.11557	155.245	5.22403	258.809	76.4776	94.6269	146.452	4.11557
SK15_61A_108	291	-592.857	1.86538	0.04951	0.00114756	0.1654	0.0052681	0.02409	0.000716262	0.89677	153.377	4.50358	155.419	4.75659	172.054	27.3834	98.7351	153.377	4.50358
SK15_61A_109	54.9	247	5.0137	0.0512	0.00270159	0.1616	0.00956273	0.02271	0.000776658	0.46698	144.344	4.84235	152.103	8.4753	249.844	114.621	95.1728	144.344	4.84235
SK15_61A_110	92.3	1786.96	2.73077	0.0494	0.00214153	0.1549	0.00867223	0.02269	0.000800958	0.66678	144.549	5.09757	146.229	7.68455	166.86	87.1211	98.9094	144.549	5.09757
SK15_61A_111	127.2	154.714	1.57426	0.048	0.00230903	0.0961	0.00526347	0.01454	0.0004706	0.42655	93.0411	3.03772	93.1699	4.87367	99.2691	86.4237	99.8777	93.0411	3.03772
SK15_61A_112	205.8	1771.04	2.81532	0.0491	0.00147456	0.1787	0.0066433	0.02638	0.000784067	0.68013	167.92	4.92362	166.941	5.848	152.609	53.3469	100.546	167.92	4.92362
SK15_61A_113	291	-2217.27	2.69944	0.04835	0.00131423	0.0946	0.00354678	0.014	0.000417732	0.81309	89.5617	2.68423	91.7795	3.26681	116.43	42.5859	97.6514	89.5617	2.68423
SK15_61A_114	334	2937	2.63407	0.04789	0.00124156	0.0983	0.00491072	0.01472	0.000606277	0.93619	94.2005	3.79995	95.2059	4.61171	93.8385	36.5958	98.943	94.2005	3.79995
SK15_61A_115	483	-908.571	1.24806	0.05099	0.0012202	0.1581	0.00525721	0.0224	0.000671345	0.90283	142.426	4.20402	149.039	4.75206	240.378	30.5536	95.8182	142.426	4.20402
SK15_61A_116	91.1	152	414.091	0.048	0.0037258	0.0736	0.00559703	0.01134	0.000451152	0.30042	72.6415	2.88975	72.11	5.30749	99.2691	148.917	100.806	72.6415	2.88975
SK15_61A_117	269.6	-3937	2.11617	0.0478	0.00145737	0.1629	0.0083609	0.02463	0.00100849	0.74421	157.128	6.34448	153.238	7.3732	89.3818	46.6682	102.358	157.128	6.34448
SK15_61A_118	64.8	85.8	2160	0.0509	0.00500463	0.0788	0.00884159	0.01116	0.000493374	0.53781	71.2286	3.13209	77.0161	8.25717	236.304	214.874	92.8942	71.2286	3.13209
SK15_61A_119	109.1	154.25	2.70384	0.0506	0.00215271	0.1335	0.00611383	0.01885	0.000579421	0.35825	120.052	3.68235	127.238	5.52269	222.65	101.302	94.6132	120.052	3.68235
SK15_61A_120	573	3069.31	3.13115	0.0529	0.00167612	0.1317	0.00538776	0.01818	0.000684547	0.70161	115.47	4.26065	125.624	4.89483	324.51	55.9789	92.453	115.47	4.26065
SK15_61A_121	280.8	-416	2.11925	0.0499	0.0016389	0.1198	0.0046627	0.01704	0.000564486	0.70817	108.685	3.54036	114.891	4.27322	190.338	58.8445	94.8045	108.685	3.54036
SK15_61A_122	130.4	457.75	2.74526	0.0487	0.00146924	0.1575	0.00557517	0.02357	0.000638058	0.56571	150.246	4.04029	148.512	4.98248	133.413	50.3571	101.122	150.246	4.04029
SK15_61A_123	641	-2446.67	0.897759	0.04837	0.00114903	0.1284	0.00418146	0.0191	0.000511394	0.87055	121.98	3.28482	122.659	3.87644	117.405	30.1953	99.4346	121.98	3.28482
SK15_61A_124	104.4	656	3.6	0.0511	0.0020699	0.1099	0.0054618	0.01597	0.000618802	0.46856	101.741	3.95212	105.874	4.97614	245.343	81.2535	96.4693	101.741	3.95212
SK15_61A_125	447	373.25	111.75	0.0479	0.00145869	0.073	0.00272426	0.01103	0.000372377	0.74318	70.672	2.36748	71.5423	2.53973	94.3329	50.7517	98.8431	70.672	2.36748
SK15_61A_126	142.2	450.25	2.35821	0.0505	0.00149335	0.1489	0.00564876	0.02101	0.000676364	0.73937	133.731	4.32057	140.94	5.14259	218.073	52.9232	95.1013	133.731	4.32057
SK15_61A_127	849	900	49.9412	0.05183	0.00142651	0.077	0.00236888	0.01077	0.000353266	0.71252	68.6665	2.25511	75.3205	2.27175	277.917	47.4476	91.6838	68.6665	2.25511
SK15_61A_128	213	-762.5	1.88329	0.0494	0.00147856	0.1646	0.00865085	0.0242	0.00120177	0.89975	154.093	7.73972	154.722	7.56707	166.86	50.6735	99.6276	154.093	7.73972
SK15_61A_129	2290	-43186	4.45525	0.04757	0.00101033	0.0901	0.00332974	0.01371	0.000518445	0.95779	87.8021	3.30515	87.5965	3.13754	77.9374	17.0577	100.209	87.8021	3.30515
SK15_61A_130	303	521.429	1.67219	0.04708	0.00128199	0.1319	0.00556498	0.02021	0.000731763	0.83295	129.234	4.68462	125.804	5.0687	53.2869	37.4095	102.527	129.234	4.68462
SK15_61A_131	153.1	32114.3	1.6322	0.0475	0.00153052	0.1607	0.00734097	0.02462	0.000738213	0.72458	157.125	4.635	151.316	6.45409	74.4384	53.4637	103.617	157.125	4.635
SK15_61A_132	521	264000	2.55392	0.04943	0.001223	0.1734	0.00650208	0.02541	0.000856952	0.93134	161.729	5.38136	162.365	5.79686	168.278	34.4251	99.6252	161.729	5.38136
SK15_61A_133	162.1	628	2.95803	0.0483	0.00222107	0.0867	0.0051036	0.01332	0.000393788	0.68487	85.2362	2.47815	84.4246	4.80758	113.989	84.7919	101.036	85.2362	2.47815
SK15_61A_134	45.9	-167.25	2.80049	0.0518	0.00243173	0.1689	0.00970674	0.02454	0.00101636	0.6293	155.764	6.39455	158.464	8.5196	276.591	95.7844	98.6251	155.764	6.39455
SK15_61A_135	156	1152.5	3.10757	0.0494	0.00163283	0.1672	0.00601518	0.02452	0.000814243	0.58086	156.115	5.15173	156.986	5.32396	166.86	60.4029	99.4734	156.115	5.15173
SK15_61A_136	177	1182.29	153.913	0.0478	0.00212695	0.0703	0.00395813	0.01063	0.000367694	0.66756	68.1268	2.33866	68.9841	3.76609	89.3818	71.5278	98.8108	68.1268	2.33866
SK15_61A_137	356	9307.69	90.8163	0.0476	0.0016113	0.0735	0.0036126	0.01123	0.000321473	0.76696	71.9761	2.07864	72.0154	3.41886	79.4346	56.2079	99.9644	71.9761	2.07864
SK15_61A_138	277	-5683.72	3.51523	0.048	0.00138622	0.0985	0.00384329	0.01486	0.000429451	0.6604	95.0787	2.68782	95.3908	3.55766	99.2691	45.2552	99.6836	95.0787	2.68782
SK15_61A_139	108.9	146.8	2.68227	0.0522	0.00216793	0.1588	0.00805276	0.02241	0.000709495	0.48512	142.269	4.42385	149.652	7.16201	294.181	86.9053	95.4675	142.269	4.42385
SK15_61A_140	113.2	285.333	3.01224	0.052	0.00174402	0.1799	0.00632342	0.02524	0.000724723	0.49108	160.131	4.59017	167.975	5.61731	285.41	64.9306	95.6622	160.131	4.59017
SK15_61A_141	53.7	177.75	1.53604	0.0509	0.00297932	0.1514	0.00855388	0.02219	0.000837292	0.43064	141.116	5.3015	143.147	7.66227	236.304	123.38	98.8366	141.116	5.3015
SK15_61A_142	250	1850	2.30415	0.0486	0.00139456	0.1631	0.00588648	0.02424	0.000893046	0.76921	154.503	5.62742	153.413	5.20166	128.579	47.2824	100.642	154.503	5.62742
SK16-01: Eagle Creek Horst
SK16_01_1	312	1867.06	1.67832	0.0493	0.00179505	0.1083	0.0045488	0.01573	0.000336709	0.50772	100.45	2.15826	104.409	4.16206	162.123	69.9558	96.364	100.45	2.15826
SK16_01_10	494.5	37775	3.60423	0.08863	0.00181717	2.847	0.0638996	0.2342	0.00521822	0.86796	1353.25	29.5962	1368.02	28.4236	1396.18	29.218	99.1561	1396.18	29.218
SK16_01_100	98.6	-564	4.04098	0.0471	0.00177126	0.0905	0.00439046	0.01386	0.000360194	0.51954	88.8114	2.32608	87.969	4.18632	54.3003	56.8964	100.869	88.8114	2.32608
SK16_01_101	262.7	409.6	1.34787	0.0489	0.00187523	0.0821	0.00341997	0.01238	0.000306114	0.58161	79.1852	1.92733	80.1174	3.2266	143.039	75.6605	99.0006	79.1852	1.92733
SK16_01_102	159	-305	2.44992	0.0486	0.00170434	0.1228	0.00566056	0.01828	0.000520157	0.73892	116.74	3.34745	117.607	5.17023	128.579	62.5563	99.2934	116.74	3.34745
SK16_01_103	161.2	275	1.19851	0.0494	0.00179615	0.0925	0.003273	0.01359	0.000331625	0.28066	86.8344	2.10965	89.8296	3.07926	166.86	72.6243	96.8688	86.8344	2.10965
SK16_01_104	151.4	-330	2.84586	0.0495	0.0014799	0.1646	0.00607019	0.02426	0.00062251	0.52473	154.452	3.91135	154.722	5.37968	171.582	65.562	99.8717	154.452	3.91135
SK16_01_105	115.7	-269.5	2.26863	0.0474	0.00177446	0.0976	0.00499703	0.01476	0.000362275	0.3722	94.5141	2.35239	94.5585	4.69994	69.4269	61.9369	99.8891	94.5141	2.35239
SK16_01_106	195.6	-7466.67	4.27074	0.08771	0.00189244	2.166	0.0569704	0.18	0.00481664	0.93341	1049.5	26.836	1170.2	26.302	1376.14	31.8364	91.179	1376.14	31.8364
SK16_01_107	440	-525.857	0.74983	0.04926	0.00122618	0.0903	0.00284634	0.01351	0.000342211	0.6706	86.3409	2.16002	87.7828	2.7369	160.225	34.6273	98.5478	86.3409	2.16002
SK16_01_108	234.8	41510	2.65611	0.10578	0.00214771	4.118	0.0974021	0.2828	0.00614413	0.91579	1590.77	33.9632	1657.88	34.9281	1727.91	35.1459	96.8374	1727.91	35.1459
SK16_01_109	455	2120	1.17389	0.0491	0.00162921	0.0842	0.00326739	0.01248	0.000313688	0.76753	79.8018	1.99504	82.086	3.07456	152.609	59.9244	97.402	79.8018	1.99504
SK16_01_11	415	39875	5.02421	0.08898	0.00181369	2.918	0.0643031	0.2373	0.00507588	0.73961	1370.07	28.9953	1386.59	28.6263	1403.73	29.0592	98.9944	1403.73	29.0592
SK16_01_110	188	246.222	3.05195	0.0476	0.00203625	0.1234	0.00611972	0.01884	0.00046355	0.6988	120.448	2.9496	118.15	5.53216	79.4346	77.5135	101.837	120.448	2.9496
SK16_01_111	127.3	192.9	3.2001	0.0509	0.00165116	0.1656	0.00616517	0.02404	0.000645034	0.58943	152.79	4.07412	155.593	5.47101	236.304	60.0229	98.4223	152.79	4.07412
SK16_01_112	289	30812.5	3.31422	0.10555	0.00223695	4.002	0.112461	0.2753	0.0072392	0.88317	1549.7	39.0382	1634.6	36.4	1723.92	36.8475	95.904	1723.92	36.8475
SK16_01_113	89.2	-764	2.32655	0.0499	0.00214616	0.1464	0.00631927	0.02115	0.000555454	0.19763	134.719	3.54056	138.728	5.72228	190.338	86.8858	97.2547	134.719	3.54056
SK16_01_114	214.7	-1698.18	3.689	0.0476	0.00212516	0.0904	0.00402851	0.01393	0.000326371	0.44898	89.2011	2.09589	87.8759	3.82656	79.4346	76.6801	101.483	89.2011	2.09589
SK16_01_115	232.3	313.333	2.35598	0.0479	0.00177982	0.0876	0.00330295	0.01307	0.000354866	0.25758	83.686	2.24735	85.2652	3.10846	94.3329	69.5341	98.1746	83.686	2.24735
SK16_01_116	565	-313500	15.7821	0.04904	0.00107092	0.119	0.00310876	0.01763	0.000415604	0.78394	112.55	2.64987	114.165	2.90812	149.744	21.3163	98.6818	112.55	2.64987
SK16_01_117	199.5	-8705.71	0.613846	0.09337	0.00195246	3.133	0.0969653	0.2435	0.00663075	0.9427	1396.84	36.1019	1440.83	33.982	1495.4	32.2268	97.5039	1495.4	32.2268
SK16_01_118	198	-931.667	2.04124	0.0491	0.00213877	0.0917	0.00404024	0.01364	0.000326833	0.27858	87.1857	2.11584	89.0858	3.83807	152.609	86.6696	98.0345	87.1857	2.11584
SK16_01_12	119.9	-912.857	2.5565	0.0496	0.00179835	0.1718	0.00574161	0.02485	0.000607873	0.61044	158.159	3.85188	160.98	5.13438	176.291	67.9738	98.2951	158.159	3.85188
SK16_01_121	208.3	1262	3.67372	0.0496	0.00148124	0.0991	0.0035956	0.01451	0.000410263	0.57354	92.661	2.58027	95.9452	3.39553	176.291	53.4139	96.79	92.661	2.58027
SK16_01_122	150.3	3708.75	2.24664	0.11158	0.00228913	4.84	0.146527	0.3153	0.00905625	0.96683	1758.08	47.4465	1791.88	40.5621	1825.31	37.438	98.5969	1825.31	37.438
SK16_01_123	75.2	149.25	2.26165	0.0514	0.00242833	0.1789	0.0085815	0.02557	0.000796009	0.48426	162.331	4.98974	167.114	7.49145	258.809	97.0626	97.3964	162.331	4.98974
SK16_01_124	117.6	1554	2.85437	0.0496	0.00171583	0.1449	0.0064837	0.02167	0.000646711	0.46456	138.061	4.07508	137.399	5.14735	176.291	69.1631	100.584	138.061	4.07508
SK16_01_125	1325	-34157.1	116.432	0.1126	0.0022985	4.448	0.120987	0.2876	0.00788958	0.98096	1602.37	41.6221	1721.33	37.9642	1841.8	37.5524	94.6668	1841.8	37.5524
SK16_01_127	172.3	1267.27	4.90464	0.0492	0.00187836	0.0903	0.00341638	0.01311	0.00033593	0.18018	83.802	2.11923	87.7828	3.22017	157.373	77.2078	95.6489	83.802	2.11923
SK16_01_128	586	651.25	1.99184	0.04804	0.00134415	0.0952	0.00314249	0.01435	0.000367789	0.72466	91.8264	2.37049	92.3359	2.95034	101.239	44.1508	99.4723	91.8264	2.37049
SK16_01_129	235.5	-17110	5.05582	0.08864	0.00183663	2.836	0.0762769	0.2337	0.00577982	0.92507	1350.42	32.4306	1365.11	30.2397	1396.39	29.6651	99.1759	1396.39	29.6651
SK16_01_13	137.3	447.556	2.75703	0.0495	0.00188152	0.1551	0.00596929	0.02291	0.00053698	0.45845	145.921	3.42837	146.405	5.3689	171.582	74.1948	99.7377	145.921	3.42837
SK16_01_130	80	236	2.02532	0.0494	0.00205332	0.1558	0.00658403	0.02355	0.000580897	0.22769	149.986	3.66162	147.02	6.70241	166.86	113.364	102.063	149.986	3.66162
SK16_01_131	88.7	170.333	1.72568	0.0485	0.00363193	0.1237	0.00856509	0.01837	0.000468063	0.54398	117.326	2.95671	118.421	8.49368	123.73	142.787	99.0924	117.326	2.95671
SK16_01_132	204.9	-529.5	2.51103	0.049	0.00154932	0.1676	0.00687284	0.02511	0.000617904	0.60759	159.922	3.88296	157.334	6.07892	147.831	68.4633	101.612	159.922	3.88296
SK16_01_133	1082	-3582.5	1.50278	0.04868	0.00108549	0.1427	0.00386074	0.02143	0.000511955	0.85402	136.702	3.21949	135.446	3.55413	132.447	24.4093	100.916	136.702	3.21949
SK16_01_134	262	457.8	2.88864	0.0505	0.00233026	0.097	0.00444563	0.01402	0.00033871	0.29492	89.4435	2.15143	94.0033	4.15389	218.073	94.1514	95.4764	89.4435	2.15143
SK16_01_135	609	4590.91	1.81791	0.04992	0.00133087	0.0926	0.00265328	0.01363	0.000369879	0.60549	87.031	2.36217	89.9225	2.47505	191.27	41.6684	97.0516	87.031	2.36217
SK16_01_136	109.7	637.857	1.74404	0.0498	0.00306627	0.088	0.00558459	0.01304	0.000354424	0.37732	83.2927	2.23918	85.6386	5.59629	185.669	134.146	97.5237	83.2927	2.23918
SK16_01_137	260.1	6395.71	1.53723	0.10444	0.0021455	3.998	0.0937795	0.2779	0.00641337	0.937	1566.46	35.1117	1633.79	34.1429	1704.48	35.1578	96.7553	1704.48	35.1578
SK16_01_138	122.2	-228.6	2.87124	0.0487	0.00204663	0.1006	0.00474744	0.01519	0.000434044	0.53929	97.093	2.78604	97.33	4.35989	133.413	80.2927	99.8507	97.093	2.78604
SK16_01_139	147.9	-1438.12	2.51232	0.0488	0.00154679	0.169	0.00570827	0.02528	0.00062067	0.49787	161.037	3.9588	158.551	5.10545	138.233	55.1622	101.507	161.037	3.9588
SK16_01_14	279	435	2.05298	0.0487	0.00131938	0.0976	0.00286711	0.01462	0.000319996	0.49843	93.4672	2.04488	94.5585	2.75345	133.413	42.5333	98.9485	93.4672	2.04488
SK16_01_140	206.5	3814.29	2.00485	0.09595	0.00199626	2.736	0.09528	0.2078	0.00754734	0.95989	1193.24	40.2046	1338.29	34.0332	1546.79	32.8328	90.9434	1546.79	32.8328
SK16_01_141	134.1	1427.33	2.91522	0.0491	0.00179285	0.1738	0.00642204	0.02587	0.000712603	0.31112	164.701	4.52464	162.711	5.63498	152.609	71.2142	101.19	164.701	4.52464
SK16_01_142	161.2	-221.333	2.68667	0.0492	0.00163042	0.1335	0.00620394	0.01953	0.000566276	0.80634	124.577	3.59923	127.238	5.61165	157.373	61.6173	97.9935	124.577	3.59923
SK16_01_143	431.3	38625	1.78963	0.08952	0.001882	2.874	0.08309	0.2334	0.00641484	0.93964	1347.18	35.3721	1375.12	31.8187	1415.31	30.7458	98.34	1415.31	30.7458
SK16_01_15	290	7366.67	3.40776	0.10334	0.00217579	3.384	0.0938381	0.237	0.00566371	0.94433	1342.55	31.0879	1500.7	33.5566	1684.96	35.7718	91.363	1684.96	35.7718
SK16_01_16	501	-37350	2.22272	0.08753	0.00185383	2.804	0.0645675	0.2329	0.00499369	0.62147	1347.88	28.646	1356.61	28.4627	1372.19	30.3679	99.4895	1372.19	30.3679
SK16_01_18	76.8	-401.333	4.20591	0.0481	0.00240113	0.1601	0.00662516	0.02455	0.00056034	0.083988	156.562	3.5638	150.791	5.9276	104.191	99.0545	103.685	156.562	3.5638
SK16_01_19	646	-2450	1.53408	0.04697	0.00113669	0.1141	0.00296943	0.01765	0.000396244	0.63578	112.974	2.55924	109.709	2.77577	47.702	29.2209	102.805	112.974	2.55924
SK16_01_2	109.6	124.286	1.97087	0.0511	0.00364616	0.0864	0.00595617	0.01219	0.000276294	0.06353	77.7561	1.75164	84.1443	5.65887	245.343	149.42	92.8247	77.7561	1.75164
SK16_01_20	121.2	355.556	3.99473	0.0492	0.00213969	0.1127	0.00575938	0.01627	0.000416515	0.42829	103.893	2.62056	108.432	5.26847	157.373	85.344	95.9485	103.893	2.62056
SK16_01_21	290	1117500	3.7323	0.08745	0.0018035	2.877	0.063991	0.2396	0.00527288	0.82033	1385.8	29.8243	1375.91	28.496	1370.43	29.1085	100.633	1370.43	29.1085
SK16_01_22	113.1	-305.862	1.83902	0.0472	0.00212159	0.0796	0.00348489	0.01223	0.000297874	0.073738	78.3992	1.91535	77.7688	3.28975	59.358	73.3342	100.762	78.3992	1.91535
SK16_01_23	86.2	-161.8	2.47915	0.0479	0.00239953	0.0985	0.00546726	0.01465	0.000349212	0.016648	93.7535	2.22586	95.3908	5.0766	94.3329	93.3894	98.285	93.7535	2.22586
SK16_01_24	202.8	110333	1.92776	0.0498	0.00180056	0.1759	0.00712856	0.02557	0.000598022	0.50037	162.662	3.8186	164.526	6.24186	185.669	71.9017	98.928	162.662	3.8186
SK16_01_25	182.6	1476	3.02819	0.0486	0.00139456	0.1706	0.00481682	0.02517	0.000596499	0.49687	160.382	3.78128	159.94	4.31815	128.579	48.2855	100.193	160.382	3.78128
SK16_01_26	156	-811.875	2.63825	0.0493	0.00155313	0.0882	0.00330934	0.01297	0.000299647	0.50561	82.9004	1.89999	85.8252	3.11614	162.123	58.21	96.7926	82.9004	1.89999
SK16_01_28	27.04	-81.7333	3.75035	0.0477	0.00401499	0.0922	0.00889328	0.01427	0.000421371	0.15863	91.3564	2.70824	89.5507	8.30898	84.4158	239.184	101.998	91.3564	2.70824
SK16_01_29	42.7	-385	4.44792	0.0535	0.00452823	0.146	0.0123502	0.01975	0.000490026	-0.10282	125.282	3.13712	138.374	10.402	350.061	186.102	91.1123	125.282	3.13712
SK16_01_3	272.1	51100	2.67289	0.10569	0.0021893	4.379	0.095871	0.2984	0.00629421	0.8273	1677.76	35.0047	1708.38	34.9599	1726.35	35.9184	98.5358	1726.35	35.9184
SK16_01_30	382.7	-956.786	242.215	0.0487	0.00178848	0.0728	0.00280712	0.01087	0.000239296	0.20236	69.5795	1.53548	71.3531	2.70821	133.413	69.2656	97.6755	69.5795	1.53548
SK16_01_31	67	-140	3.05796	0.0521	0.00216697	0.1382	0.0071554	0.01972	0.000568904	0.52391	125.317	3.60268	131.439	6.46076	289.801	85.7957	95.775	125.317	3.60268
SK16_01_32	169.7	-768.846	2.94618	0.0489	0.0016268	0.1245	0.00352847	0.01836	0.000428061	0.054616	117.203	2.72973	119.144	3.2437	143.039	61.0837	98.4382	117.203	2.72973
SK16_01_33	665	-3390.91	40.4501	0.04808	0.00112298	0.1169	0.00357159	0.01756	0.000449156	0.82456	112.243	2.87782	112.258	3.36112	103.207	28.4065	99.9634	112.243	2.87782
SK16_01_34	1203	1.90333e+06	11.5451	0.09008	0.00194015	2.781	0.0631948	0.2239	0.0050806	0.58807	1292.85	28.8957	1350.45	28.1691	1427.23	32.2469	96.4458	1427.23	32.2469
SK16_01_35	379	-2783.33	2.77249	0.0482	0.00153925	0.0911	0.00301325	0.01372	0.000308051	0.67034	87.7954	1.96833	88.5276	2.82451	109.097	55.1016	99.2274	87.7954	1.96833
SK16_01_36	183.6	-590.882	7.64045	0.0485	0.0017032	0.1135	0.00368278	0.01714	0.000391933	0.33809	109.515	2.49703	109.162	3.39438	123.73	64.9056	100.36	109.515	2.49703
SK16_01_37	232.5	2715	3.96758	0.05026	0.00133597	0.1274	0.00364037	0.01821	0.000436167	0.3985	116.05	2.76178	121.759	3.4185	207.035	41.8156	95.544	116.05	2.76178
SK16_01_38	765	-2273.08	2.09016	0.04851	0.00119054	0.0813	0.0022812	0.0121	0.000279578	0.68574	77.4399	1.79066	79.3664	2.18351	124.215	33.4186	97.6905	77.4399	1.79066
SK16_01_39	339.8	-1161.48	2.35319	0.0484	0.00146527	0.095	0.00338378	0.01436	0.000328761	0.51521	91.8479	2.08628	92.1504	3.18812	118.867	51.5638	99.7414	91.8479	2.08628
SK16_01_4	168.4	538.966	1.90713	0.0494	0.00171352	0.0983	0.00333993	0.01437	0.000319685	0.099418	91.7946	2.04387	95.2059	3.14268	166.86	64.8072	96.6071	91.7946	2.04387
SK16_01_40	226	-1089.44	1.57711	0.0494	0.00196625	0.0931	0.00396447	0.01367	0.000327334	0.39995	87.3432	2.11811	90.3871	3.76229	166.86	79.4301	96.8342	87.3432	2.11811
SK16_01_41	122.7	-10972.2	1.46071	0.09196	0.00191968	3.251	0.0796467	0.2563	0.00593935	0.86106	1471.29	33.0299	1469.42	31.0374	1466.56	31.3275	100.1	1466.56	31.3275
SK16_01_42	188.6	29860	3.93737	0.09021	0.00185244	3.052	0.0782744	0.2452	0.00632845	0.91864	1412.25	34.5946	1420.73	30.8471	1429.98	29.9822	99.503	1429.98	29.9822
SK16_01_43	224.8	1254	1.56764	0.0478	0.00145737	0.1154	0.00347662	0.01751	0.000474384	0.25896	111.965	3.00318	110.893	3.26775	89.3818	48.6963	100.908	111.965	3.00318
SK16_01_44	43.4	5112.5	2.7125	0.0471	0.00401215	0.0976	0.00833189	0.01499	0.000417109	0.069182	96.0162	2.63353	94.5585	7.74698	54.3003	124.12	101.434	96.0162	2.63353
SK16_01_45	535	564.889	3.2984	0.04837	0.00130106	0.0999	0.00312282	0.01488	0.000370089	0.65231	95.1612	2.36234	96.684	2.93045	117.405	47.2399	98.4816	95.1612	2.36234
SK16_01_46	144	13025	2	0.10973	0.00224436	4.29	0.105857	0.2838	0.00661642	0.86944	1587.73	35.9035	1691.44	35.8952	1794.93	36.7576	95.2129	1794.93	36.7576
SK16_01_47	1155	42475	12.3397	0.08974	0.00184103	2.833	0.0627643	0.2289	0.00495662	0.74522	1321.51	28.2388	1364.32	28.195	1420	29.7031	97.3917	1420	29.7031
SK16_01_48	51.4	-340.909	1.78472	0.0531	0.00290135	0.1689	0.0095195	0.02303	0.000584596	0.48645	146.008	3.70951	158.464	8.42676	333.072	125.08	92.625	146.008	3.70951
SK16_01_49	59	-503.571	2.25967	0.0502	0.00335381	0.1283	0.0102271	0.01876	0.00046225	0.64262	119.543	2.93152	122.569	9.24328	204.264	178.778	97.7526	119.543	2.93152
SK16_01_5	375	100333	1.8482	0.04914	0.00118945	0.1691	0.0042659	0.02498	0.00055	0.40009	159.072	3.51722	158.638	3.91819	154.516	32.4645	100.262	159.072	3.51722
SK16_01_50	101.8	-414.75	2.43949	0.0483	0.00222107	0.0844	0.00415805	0.0127	0.000290028	0.4415	81.2855	1.84817	82.2733	3.96115	113.989	85.5224	98.8826	81.2855	1.84817
SK16_01_51	178.9	-1428.18	3.51612	0.0529	0.00175481	0.1006	0.0040371	0.01379	0.000329341	0.51809	87.7132	2.06674	97.33	3.74641	324.51	60.5566	90.7106	87.7132	2.06674
SK16_01_53	279	-690	2.56434	0.04955	0.00131213	0.1597	0.005041	0.02356	0.000605334	0.64601	150.02	3.84139	150.441	4.54083	173.938	40.8358	99.7843	150.02	3.84139
SK16_01_54	120.7	-208.571	3.19481	0.0491	0.00187732	0.1311	0.00591311	0.0193	0.000476861	0.60494	123.135	3.04983	125.086	5.41573	152.609	72.8311	98.5168	123.135	3.04983
SK16_01_55	212.3	496.486	5.29294	0.0498	0.00171814	0.0927	0.00352666	0.01357	0.000368996	0.48185	86.6629	2.35589	90.0154	3.24555	185.669	66.0525	96.5275	86.6629	2.35589
SK16_01_56	281.9	-839	2.57678	0.0479	0.00135623	0.0924	0.00265049	0.01403	0.000309251	0.068879	89.8042	1.98692	89.7366	2.54238	94.3329	44.7238	100.087	89.8042	1.98692
SK16_01_57	81.3	743.846	2.55982	0.0467	0.00220734	0.122	0.00477112	0.01856	0.000510186	0.22429	118.804	3.24074	116.884	4.37617	33.9129	61.9317	101.425	118.804	3.24074
SK16_01_58	48.25	-101.286	2.58436	0.0529	0.00365641	0.168	0.0115017	0.02297	0.000577536	0.27001	145.668	3.64409	157.682	10.2879	324.51	143.313	92.8447	145.668	3.64409
SK16_01_59	78.7	1462.73	3.17339	0.0502	0.001805	0.2238	0.0083087	0.03189	0.000737353	0.30121	202.356	4.65476	205.068	7.10516	204.264	67.869	98.6828	202.356	4.65476
SK16_01_6	140.1	-123.889	2.09104	0.0467	0.00229834	0.0796	0.00384506	0.01234	0.000278945	0.016264	79.1518	1.78334	77.7688	3.56052	33.9129	64.9432	101.663	79.1518	1.78334
SK16_01_60	391	44230.8	4.83313	0.08865	0.00181539	2.866	0.0646961	0.2328	0.00528473	0.85308	1345.34	29.8674	1373.02	28.5744	1396.61	29.1681	98.2619	1396.61	29.1681
SK16_01_61	509	-15520	7.16901	0.08796	0.00186526	2.927	0.0709009	0.2418	0.00563887	0.82561	1397.27	31.723	1388.92	29.5233	1381.61	30.9792	100.513	1381.61	30.9792
SK16_01_62	609	12585.7	11.9835	0.08871	0.00180108	2.793	0.0643765	0.2284	0.00541079	0.83899	1320.48	30.3415	1353.67	28.3766	1397.91	28.7497	97.9642	1397.91	28.7497
SK16_01_63	68.2	-31600	2.14803	0.0512	0.00270159	0.1541	0.00746584	0.02198	0.000515895	0.082928	139.737	3.26826	145.526	6.67332	249.844	114.621	96.3112	139.737	3.26826
SK16_01_64	80.4	-13542.9	3.14308	0.0501	0.00156333	0.1293	0.00381148	0.0186	0.000471682	0.3446	118.545	2.97443	123.469	3.51493	199.635	54.1305	96.2203	118.545	2.97443
SK16_01_65	149	1266.09	2.14388	0.0488	0.00170663	0.2077	0.00713412	0.03076	0.000717893	0.11748	195.602	4.53988	191.621	6.22114	138.233	64.1677	101.922	195.602	4.53988
SK16_01_66	328	322.222	1.57996	0.0466	0.00159957	0.0896	0.00402135	0.01391	0.000336891	0.8229	89.1869	2.15123	87.1307	3.73288	28.7764	44.6829	102.205	89.1869	2.15123
SK16_01_67	99.6	-243000	1.34232	0.09811	0.00210424	3.747	0.111826	0.2766	0.00739006	0.90018	1572.64	40.1645	1581.47	36.3953	1588.51	34.7199	99.5412	1588.51	34.7199
SK16_01_69	88.8	-10385.7	2.08892	0.0472	0.00276607	0.0841	0.00480407	0.01295	0.000333438	0.13777	82.9948	2.1725	81.9923	4.50841	59.358	93.2844	101.162	82.9948	2.1725
SK16_01_7	148	1518.33	2.263	0.0513	0.0016561	0.1355	0.00474912	0.01918	0.000419582	0.34273	122.031	2.67534	129.028	4.34909	254.333	60.2377	94.9186	122.031	2.67534
SK16_01_70	478.7	2550	1.16133	0.04878	0.00126166	0.1687	0.00478998	0.02517	0.000576031	0.65892	160.346	3.67779	158.29	4.29316	137.27	38.7364	101.237	160.346	3.67779
SK16_01_71	313.7	-36452.9	1.71234	0.10999	0.00226996	4.724	0.113558	0.3115	0.00724589	0.84725	1740.74	39.1585	1771.51	37.0994	1799.24	37.1673	98.6778	1799.24	37.1673
SK16_01_72	109.8	1618.18	1.96986	0.0487	0.00195925	0.1699	0.00742337	0.02566	0.000558367	0.13365	163.458	3.55685	159.332	6.53129	133.413	99.4891	102.508	163.458	3.55685
SK16_01_73	209.4	-1692.73	4.98571	0.0474	0.00177446	0.0916	0.00351514	0.01408	0.000334213	-0.061772	90.1801	2.11309	88.9928	3.32028	69.4269	93.4211	101.281	90.1801	2.11309
SK16_01_74	222.5	32812.5	1.89685	0.0508	0.00206694	0.1322	0.0048786	0.01878	0.000468482	0.11838	119.578	2.99035	126.073	4.47681	231.765	82.2359	95.1363	119.578	2.99035
SK16_01_75	145.1	11775	1.61402	0.09951	0.00202615	3.563	0.0842792	0.2588	0.00593304	0.9523	1470.46	32.9518	1541.33	32.4087	1614.94	33.0701	96.2609	1614.94	33.0701
SK16_01_76	1159	4661.9	30.4359	0.04763	0.00112581	0.0882	0.00225204	0.01339	0.000311956	0.59571	85.7553	1.98508	85.8252	2.15254	80.9306	28.5555	99.9062	85.7553	1.98508
SK16_01_77	49.4	285.238	2.93698	0.0475	0.00343402	0.1249	0.0101134	0.01961	0.000560197	0.23587	125.355	3.54273	119.505	9.23009	74.4384	223.32	104.758	125.355	3.54273
SK16_01_78	246.6	-480.375	1.58382	0.0498	0.00139029	0.169	0.00516085	0.02461	0.000576421	0.63337	156.603	3.66208	158.551	4.65003	185.669	46.8184	98.8488	156.603	3.66208
SK16_01_79	275	-870	4.4	0.04943	0.00123488	0.1705	0.0055667	0.02504	0.00062865	0.77177	159.393	3.99022	159.853	4.96696	168.278	34.6305	99.7358	159.393	3.99022
SK16_01_8	93.6	1100	2.92409	0.0503	0.00188998	0.1256	0.00506657	0.01811	0.000400111	0.44305	115.411	2.55574	120.136	4.58173	208.88	74.4989	96.3073	115.411	2.55574
SK16_01_80	158.1	-235.5	3.75802	0.0494	0.00223073	0.0974	0.00427021	0.01432	0.000343693	0.001658	91.4767	2.18636	94.3735	3.97563	166.86	112.856	97.1225	91.4767	2.18636
SK16_01_81	137.4	-612.333	2.25987	0.048	0.0018659	0.1431	0.00541766	0.02124	0.000544109	0.28505	135.616	3.43136	135.801	4.92056	99.2691	68.1548	99.7693	135.616	3.43136
SK16_01_82	98.9	-124.714	3.5704	0.051	0.00242495	0.0986	0.0048217	0.01411	0.00041187	0.38195	89.9575	2.61144	95.4832	4.52227	240.83	100.807	94.5959	89.9575	2.61144
SK16_01_83	397	-887.5	1.50664	0.0476	0.00138069	0.0932	0.00353192	0.01421	0.000398961	0.77567	90.9856	2.55936	90.4799	3.33594	79.4346	46.1191	100.529	90.9856	2.55936
SK16_01_84	145.4	-1491.88	2.95769	0.0526	0.00167234	0.1911	0.00771347	0.02609	0.000758139	0.39774	165.352	4.80379	177.567	6.71764	311.581	58.1853	93.5027	165.352	4.80379
SK16_01_85	107.4	-27250	1.89418	0.18901	0.00381445	12.68	0.29464	0.486	0.0111682	0.93877	2463.76	54.447	2656.18	54.2506	2733.57	54.8481	96.1287	2733.57	54.8481
SK16_01_86	660	504.444	622.642	0.05196	0.00140126	0.0788	0.0026256	0.01093	0.000270898	0.7101	69.6713	1.71156	77.0161	2.52473	283.65	41.7737	90.9901	69.6713	1.71156
SK16_01_87	246.9	18000	1.76862	0.11583	0.00240074	4.93	0.140435	0.3103	0.00732969	0.9543	1720.02	39.1833	1807.41	39.1254	1892.83	39.1047	96.3913	1892.83	39.1047
SK16_01_88	235.4	-44200	1.645	0.10652	0.00219777	4.339	0.109026	0.2972	0.00757767	0.93669	1669.16	40.4785	1700.81	36.0702	1740.7	36.0349	98.6244	1740.7	36.0349
SK16_01_89	241.7	-19786.4	3.911	0.10795	0.00224904	4.252	0.115394	0.2851	0.00685221	0.93507	1598.79	37.0859	1684.12	36.872	1765.1	36.9763	96.0141	1765.1	36.9763
SK16_01_9	64	757.143	2.89593	0.053	0.00337099	0.188	0.0116249	0.02567	0.000610311	0.050564	162.629	3.86623	174.921	9.47494	328.797	138.039	93.4084	162.629	3.86623
SK16_01_90	118	-1765	2.18519	0.0493	0.00179505	0.1584	0.00600385	0.02344	0.000585041	0.15779	149.309	3.70917	149.302	5.40315	162.123	68.3929	100.039	149.309	3.70917
SK16_01_91	98.6	561.875	2.25114	0.0484	0.0029626	0.0965	0.00601788	0.01459	0.000384249	0.32628	93.312	2.45835	93.5404	5.62265	118.867	118.891	99.8217	93.312	2.45835
SK16_01_92	694	-813	4.47742	0.04869	0.00108567	0.1263	0.00407685	0.01879	0.000601769	0.92386	119.963	3.84071	120.768	3.77351	132.93	23.3141	99.3679	119.963	3.84071
SK16_01_94	319.3	317.111	3.14272	0.0488	0.00147057	0.0948	0.0034648	0.01415	0.000398107	0.51442	90.4649	2.55028	91.965	3.26611	138.233	54.7441	98.4912	90.4649	2.55028
SK16_01_95	359.2	697.5	1.99113	0.0483	0.00139038	0.1651	0.00542155	0.02478	0.000589932	0.59467	157.977	3.74055	155.158	4.90716	113.989	48.4739	101.7	157.977	3.74055
SK16_01_96	469.8	35200	6.18972	0.08844	0.0018157	2.88	0.064045	0.236	0.0053412	0.86411	1363.72	30.2049	1376.69	28.5112	1392.06	29.1989	99.2138	1392.06	29.1989
SK16_01_97	80.4	-555.882	3.5781	0.0484	0.00231236	0.1519	0.00818471	0.0226	0.000553809	0.45297	144.163	3.51029	143.588	7.2933	118.867	86.7469	100.334	144.163	3.51029
SK16_01_98	264.7	1464.38	3.23594	0.0489	0.00196125	0.0961	0.00471	0.01424	0.000399388	0.66664	91.026	2.55911	93.1699	4.41546	143.039	78.6228	97.8314	91.026	2.55911
SK16_01_99	85.5	-692.941	1.79622	0.0499	0.00214616	0.1521	0.00619788	0.02238	0.000678562	0.41167	142.497	4.28172	143.764	5.59714	190.338	89.0436	99.2457	142.497	4.28172

## Sheet: Table DR2. Lu-Hf data
DATA REPOSITORY TABLE DR2. DETRITAL ZIRCON Lu-Hf DATA
Sample	176Hf/177Hfa	2 SEb	176Lu/177Hf	2 SEb	176Yb/177Hf	2 SEb	178Hf/177Hf	2 SEb	εHf(0)c	2 SE	176Hf/177Hf(i)d	εHf(i)d	2 SE	assigned agee	2 SE	Total Hf (V)f	correction (in εHf units)g
KG_100B_2	0.283105	3.1e-05	0.000768	2.1e-05	0.01602	0.00043	1.46715	4.4e-05	11.3199	1.09519	0.283104	13.0094	1.09519	77.7812	1.55562	15.04	599.571
KG_100B_3	0.283053	3.5e-05	0.001758	7.4e-05	0.0444	0.0018	1.46714	6.3e-05	9.48074	1.23674	0.28305	11.335	1.23674	88.0247	1.76049	17.24	1648.5
KG_100B_4	0.283067	2.5e-05	0.00084	2.3e-05	0.01773	0.0005	1.46704	3.3e-05	9.9759	0.883339	0.283066	11.6614	0.883339	77.7805	1.55561	12.99	663.214
KG_100B_5	0.28289	2.7e-05	0.00098	3.7e-05	0.02307	0.00089	1.4671	4e-05	3.71562	0.954603	0.282887	7.21993	0.954603	162.349	3.24698	14.4	858.929
KG_100B_6	0.282374	2.7e-05	0.000649	1.3e-05	0.01644	0.00032	1.46711	3.8e-05	-14.5347	0.956348	0.282373	-12.4877	0.956348	94.131	1.88262	12.1	610.321
KG_100B_7	0.283092	2.7e-05	0.000879	2.2e-05	0.01998	0.00072	1.46713	3.2e-05	10.8601	0.953922	0.283091	12.4756	0.953922	74.6339	1.49268	11.1	744.964
KG_100B_8	0.283045	2.3e-05	0.0007	1.2e-05	0.01812	0.00047	1.4671	3.8e-05	9.19779	0.812735	0.283043	12.2281	0.812735	139.154	2.78308	11.52	672.143
KG_100B_9	0.282062	3.1e-05	0.002085	6.7e-05	0.0595	0.0012	1.46717	5.3e-05	-25.5698	1.09924	0.281992	11.8174	1.09924	1765.2	35.304	13.78	2199.46
KG_100B_10	0.281843	2.8e-05	0.000815	2.8e-05	0.0222	0.00049	1.46715	3.7e-05	-33.3155	0.993637	0.281817	2.90101	0.993637	1647.1	32.942	13.26	821.964
KG_100B_11	0.282639	2.5e-05	0.0014	3e-05	0.03774	0.00066	1.46712	3.2e-05	-5.16195	0.884677	0.282637	-3.17772	0.884677	93.2855	1.86571	11.97	1397.86
KG_100B_12	0.282941	3.2e-05	0.002094	7.5e-05	0.0447	0.0019	1.46708	5.1e-05	5.51943	1.13118	0.282935	8.88707	1.13118	161.502	3.23004	12.09	1671.21
KG_100B_14	0.282356	3.6e-05	0.0007678	6.7e-06	0.02085	0.00017	1.46705	4.5e-05	-15.1713	1.27521	0.282355	-13.0796	1.27521	96.542	1.93084	8.94	772.064
KG_100B_15	0.283031	2.7e-05	0.0004081	6.4e-06	0.00963	0.00017	1.4671	5e-05	8.70263	0.954128	0.28303	11.5101	0.954128	127.812	2.55624	9.83	358.504
KG_100B_16	0.281993	2.1e-05	0.000695	1.4e-05	0.01987	0.00046	1.4671	3.8e-05	-28.0102	0.744831	0.281975	2.14286	0.744831	1370	27.4	12.87	734.464
KG_100B_17	0.283048	4e-05	0.0005374	4.5e-06	0.01491	0.00016	1.46708	5.8e-05	9.3039	1.41344	0.283047	10.9315	1.41344	74.4306	1.48861	10.56	551.693
KG_100B_18	0.282998	3.4e-05	0.0003149	1.8e-06	0.006792	8.2e-05	1.46715	4.4e-05	7.53545	1.20163	0.282997	12.2397	1.20163	213.378	4.26757	11.43	253.818
KG_100B_19	0.283078	3.8e-05	0.000922	2.4e-05	0.02221	0.00072	1.46711	4.4e-05	10.365	1.34262	0.283077	11.9789	1.34262	74.6643	1.49329	10.82	826.143
KG_100B_20	0.282966	2.8e-05	0.000378	3.8e-05	0.00804	0.0008	1.46706	5.9e-05	6.40365	0.989693	0.282965	10.8885	0.989693	203.858	4.07717	11.68	300.643
KG_100B_21	0.282771	3.2e-05	0.00069	2.1e-05	0.01964	0.00042	1.4671	6.9e-05	-0.493267	1.13186	0.28277	1.66943	1.13186	99.4265	1.98853	9.38	726.071
KG_100B_23	0.282055	2.6e-05	0.0007537	5.5e-06	0.02228	0.00013	1.46715	3.9e-05	-25.8173	0.921969	0.282034	6.00472	0.921969	1446.8	28.936	10.47	822.632
KG_100B_24	0.282079	3.8e-05	0.00161	2.1e-05	0.0538	0.0016	1.46719	3.6e-05	-24.9685	1.34738	0.282037	4.60536	1.34738	1381.6	27.632	14.57	1978.93
KG_100B_25	0.282505	3.4e-05	0.001381	5.8e-05	0.0374	0.0013	1.46711	4.6e-05	-9.90137	1.20373	0.282503	-8.01552	1.20373	88.6567	1.77313	12.75	1385.04
KG_100B_26	0.281903	2.8e-05	0.000712	2e-05	0.01983	0.00079	1.46711	4e-05	-31.1934	0.993426	0.281879	8.11575	0.993426	1779	35.58	12.48	733.643
SK14_19_1	0.283071	2.9e-05	0.0008027	7.2e-06	0.02009	0.00018	1.46711	4.1e-05	10.1174	1.02466	0.28307	11.9182	1.02466	83	1.66	11.91	746.168
SK14_19_2	0.282786	2.3e-05	0.0003641	3e-06	0.00934	6.8e-05	1.46709	4.8e-05	0.0372657	0.81348	0.282786	1.64046	0.81348	73	1.46	12.19	346.575
SK14_19_3	0.28251	2.6e-05	0.000821	2.2e-05	0.02064	0.00076	1.46711	4e-05	-9.72453	0.920484	0.282509	-7.77673	0.920484	90	1.8	12.31	766.464
SK14_19_4	0.282108	3.6e-05	0.000599	1.5e-05	0.01684	0.00025	1.46715	6.5e-05	-23.9428	1.27633	0.282107	-22.0717	1.27633	86	1.72	11.86	622.821
SK14_19_5	0.282967	3.5e-05	0.000998	3.2e-05	0.02487	0.00066	1.4671	5.5e-05	6.43902	1.23711	0.282963	10.8866	1.23711	206	4.12	10.9	923.857
SK14_19_6	0.283071	4e-05	0.00091	6.7e-05	0.0196	0.0013	1.46713	4.9e-05	10.1174	1.41332	0.283069	12.2154	1.41332	97	1.94	10.12	732.5
SK14_19_7	0.282933	2.7e-05	0.000415	2.6e-05	0.00895	0.00055	1.4671	5e-05	5.23648	0.954458	0.282931	9.85108	0.954458	210	4.2	12.28	334.464
SK14_19_8	0.281568	2.5e-05	0.001653	5.3e-05	0.0452	0.0018	1.4671	4.5e-05	-43.042	0.888043	0.281512	-4.60248	0.888043	1793	35.86	11.88	1673.32
SK14_19_9	0.282374	3.2e-05	0.000963	3.3e-05	0.0243	0.001	1.4671	5.2e-05	-14.5347	1.13345	0.282373	-12.8981	1.13345	76	1.52	12.27	902.25
SK14_19_10	0.281939	1.7e-05	0.001607	3.9e-05	0.0426	0.0014	1.46704	4.2e-05	-29.9201	0.603074	0.281897	-0.350221	0.603074	1382	27.64	14.34	1578.82
SK14_19_11	0.282261	3.4e-05	0.001239	4.9e-05	0.0291	0.001	1.46713	4.1e-05	-18.5314	1.20477	0.282259	-16.9947	1.20477	72	1.44	9.35	1083.54
SK14_19_12	0.281826	3.8e-05	0.0007918	6.6e-06	0.02054	0.00022	1.46712	4.9e-05	-33.9168	1.34859	0.2818	4.2515	1.34859	1733	34.66	9.84	761.85
SK14_19_13	0.282454	3.1e-05	0.0004723	5.2e-06	0.01062	0.00014	1.46706	4.4e-05	-11.7052	1.09772	0.282453	-9.78081	1.09772	88	1.76	10.69	396.154
SK14_19_14	0.282489	2.4e-05	0.001312	8.8e-05	0.0309	0.0024	1.46707	4.8e-05	-10.4673	0.849741	0.282486	-8.14331	0.849741	109	2.18	11.95	1150.43
SK14_19_15	0.282891	2.4e-05	0.0004534	7.3e-06	0.01114	0.00023	1.46707	4.3e-05	3.75099	0.848533	0.28289	5.37241	0.848533	74	1.48	11.97	414.05
SK14_19_16	0.283055	2.2e-05	0.000665	1.1e-05	0.01661	0.00032	1.46708	4.3e-05	9.55148	0.777371	0.283054	11.4688	0.777371	88	1.76	12.37	616.964
SK14_19_17	0.282093	1.8e-05	0.001171	5.2e-05	0.029	0.0011	1.46713	6.2e-05	-24.4733	0.638201	0.282062	5.606	0.638201	1386	27.72	13.38	1077.54
SK14_19_18	0.282688	2.3e-05	0.000811	3e-05	0.01888	0.00071	1.46709	4.1e-05	-3.42888	0.813762	0.282687	-1.56596	0.813762	86	1.72	13.7	703.25
SK14_19_19	0.28188	2.8e-05	0.000845	1.9e-05	0.0205	0.00036	1.46704	3.8e-05	-32.0069	0.993507	0.281853	4.67182	0.993507	1669	33.38	11.8	762.321
SK14_19_20	0.282949	2.8e-05	0.000766	3.4e-05	0.01741	0.00081	1.46711	3.9e-05	5.80238	0.989753	0.282948	7.75656	0.989753	90	1.8	11.1	649.143
SK15_31A_1	0.282827	3e-05	0.001075	3.1e-05	0.0295	0.0011	1.46714	3.7e-05	1.48739	1.06091	0.282826	3.15638	1.06091	77.6411	1.55282	9.06	1091.96
SK15_31A_2	0.283076	2.7e-05	0.001022	1.8e-05	0.02828	0.00034	1.46712	5.1e-05	10.2942	0.953976	0.283074	12.2401	0.953976	90.2801	1.8056	8.65	1046.5
SK15_31A_3	0.282799	3.7e-05	0.000924	4.7e-05	0.0241	0.0015	1.46715	4.5e-05	0.49706	1.30858	0.282798	2.21252	1.30858	79.4408	1.58882	7.64	893.714
SK15_31A_4	0.282931	3.3e-05	0.000996	3.5e-05	0.02664	0.00064	1.46707	4.8e-05	5.16574	1.16657	0.282928	8.53677	1.16657	156.238	3.12477	7.92	987
SK15_31A_5	0.281591	3.3e-05	0.0001465	1.5e-06	0.00415	3e-05	1.4671	5.7e-05	-42.2285	1.17212	0.281586	-2.03357	1.17212	1790	35.8	8.62	153.446
SK15_31A_7	0.282732	3e-05	0.0004793	7.3e-06	0.01286	0.00015	1.46711	4.3e-05	-1.87265	1.06126	0.282731	0.0654153	1.06126	88.5562	1.77112	9.6	476.404
SK15_31A_8	0.283038	3.6e-05	0.001089	2e-05	0.02941	0.00084	1.46714	6.5e-05	8.95021	1.27214	0.283035	11.8012	1.27214	132.499	2.64999	8.06	1089.25
SK15_31A_9	0.282041	4.1e-05	0.0013217	7.3e-06	0.03894	0.00025	1.46712	5.5e-05	-26.3125	1.45395	0.282007	3.24793	1.45395	1369	27.38	9.83	1437.92
SK15_31A_11	0.282636	3.8e-05	0.000811	1.8e-05	0.02194	0.00053	1.46709	6e-05	-5.26806	1.34472	0.282635	-3.47734	1.34472	82.6855	1.65371	7.1	812.536
SK15_31A_14	0.283072	4e-05	0.0003068	8.9e-06	0.007	0.00023	1.46711	6.7e-05	10.1527	1.41332	0.283072	12.1558	1.41332	90.9393	1.81879	10.48	260.957
SK15_31A_16	0.281709	3.4e-05	0.0007493	9.7e-06	0.02174	0.00011	1.46711	5.2e-05	-38.0549	1.20713	0.281683	1.49708	1.20713	1793	35.86	9.07	803.189
SK15_31A_17	0.283078	3.3e-05	0.00107	4.1e-05	0.03158	0.00091	1.46716	4.8e-05	10.365	1.16596	0.283076	12.3755	1.16596	93.4145	1.86829	10.65	1166.07
SK15_31A_18	0.282966	3.3e-05	0.000274	3.5e-06	0.006783	9.7e-05	1.46708	4.4e-05	6.40365	1.16642	0.282966	8.28071	1.16642	85.1725	1.70345	9.1	252.036
SK15_31A_19	0.282994	3.1e-05	0.000684	1e-05	0.01832	0.00044	1.46709	4.4e-05	7.39398	1.09562	0.282993	9.40078	1.09562	92.176	1.84352	10.22	678.714
SK15_31A_20	0.283061	4.1e-05	0.00118	6.7e-05	0.0263	0.0014	1.46709	6.3e-05	9.76369	1.44871	0.283059	12.2376	1.44871	115.309	2.30618	8.91	981.429
SK15_61A_1	0.283043	2.2e-05	0.001254	1.2e-05	0.02845	0.0003	1.4671	3.8e-05	9.12705	0.777404	0.283041	11.1942	0.777404	96.5965	1.93193	12.98	1060.86
SK15_61A_2	0.283066	2.8e-05	0.00165	0.00014	0.0453	0.0041	1.46715	3.9e-05	9.94053	0.989343	0.283063	11.8191	0.989343	88.8737	1.77747	11.16	1676.79
SK15_61A_3	0.283034	2.7e-05	0.000598	1.3e-05	0.01299	0.0005	1.46713	5.7e-05	8.80873	0.954118	0.283032	12.1255	0.954118	151.824	3.03647	11.36	485.286
SK15_61A_4	0.282848	2.9e-05	0.000882	3.7e-05	0.0237	0.0012	1.46712	5.2e-05	2.23013	1.02547	0.282846	5.54316	1.02547	153.067	3.06135	11.04	877.929
SK15_61A_5	0.282897	4.2e-05	0.001869	5.4e-05	0.0459	0.0012	1.46708	4.5e-05	3.9632	1.4849	0.282892	6.90511	1.4849	140.143	2.80286	10.12	1706.04
SK15_61A_6	0.283079	3e-05	0.00113	2.1e-05	0.02689	0.00044	1.46709	5e-05	10.4003	1.05996	0.283077	12.5273	1.05996	99.0002	1.98	10	1000.71
SK15_61A_8	0.283068	3.8e-05	0.0007519	8.8e-06	0.01962	0.00016	1.46708	6.4e-05	10.0113	1.34267	0.283067	11.8922	1.34267	86.5578	1.73116	9.71	727.568
SK15_61A_9	0.282931	3.7e-05	0.000853	1.7e-05	0.02192	0.00034	1.4671	5.7e-05	5.16574	1.30797	0.282929	7.77135	1.30797	120.286	2.40572	10.23	813.321
SK15_61A_11	0.282848	3.3e-05	2.651e-05	4.3e-07	0.000856	2.1e-05	1.46713	4.5e-05	2.23013	1.16691	0.282848	3.80233	1.16691	70.855	1.4171	14.25	31.5182
SK15_61A_12	0.283017	3.1e-05	0.00122	1.6e-05	0.0283	0.00045	1.46711	4e-05	8.20746	1.09553	0.283015	10.3117	1.09553	98.2355	1.96471	12.51	1054.29
SK15_61A_13	0.282977	2.6e-05	0.001065	3.2e-05	0.02303	0.00075	1.46713	3.6e-05	6.79271	0.918965	0.282975	9.14567	0.918965	109.326	2.18652	11.72	860.536
SK15_61A_14	0.282893	3.1e-05	0.0010558	7.1e-06	0.02464	0.00012	1.46708	4.3e-05	3.82173	1.09601	0.282891	6.45246	1.09601	122.217	2.44433	10.83	917.707
SK15_61A_15	0.283	3e-05	0.000981	2.7e-05	0.02251	0.00072	1.46711	3.5e-05	7.60619	1.06026	0.282997	10.9177	1.06026	153.377	3.06753	14.41	838.964
SK15_61A_16	0.282959	3.1e-05	0.00075	1.9e-05	0.01924	0.00051	1.46707	4.7e-05	6.15607	1.09576	0.282958	8.17741	1.09576	93.0411	1.86082	11.9	713.929
SK15_61A_17	0.283025	3.6e-05	0.001202	1.5e-05	0.0281	0.00038	1.4671	4.5e-05	8.49041	1.2722	0.283023	10.5093	1.2722	94.2005	1.88401	10.97	1046.5
SK15_61A_18	0.283051	3.1e-05	0.000821	1.8e-05	0.02008	0.0003	1.46713	5.2e-05	9.41	1.0954	0.28305	11.6165	1.0954	101.741	2.03481	9.37	746.464
SK15_61A_19	0.282968	3.8e-05	0.00099	2.8e-05	0.026	0.0011	1.46711	6e-05	6.47439	1.34315	0.282966	9.26277	1.34315	129.234	2.58467	10.2	963.929
SK15_61A_20	0.282974	3.7e-05	0.001244	5.2e-05	0.0288	0.0014	1.46714	4.5e-05	6.6866	1.30777	0.28297	10.1503	1.30777	161.729	3.23457	11.84	1073
SK15_73_1	0.282644	3.2e-05	0.00083	1.4e-05	0.02101	0.00064	1.46713	4.9e-05	-4.98511	1.13237	0.282643	-3.22221	1.13237	81.4469	1.62894	13.94	780
SK15_73_2	0.282912	2.3e-05	0.0006847	8.5e-06	0.01572	0.00011	1.46711	3.2e-05	4.49374	0.813117	0.282911	6.75724	0.813117	103.986	2.07971	13.66	585.882
SK15_73_3	0.281984	3.2e-05	0.001325	2.8e-05	0.03636	0.00041	1.46708	5.7e-05	-28.3285	1.13502	0.281948	2.47133	1.13502	1425.9	28.518	10.18	1345.89
SK15_73_4	0.282938	4e-05	0.000924	2.4e-05	0.0225	0.001	1.46712	5.3e-05	5.41333	1.41399	0.282936	8.09458	1.41399	124.039	2.48077	13.92	836.571
SK15_73_5	0.282336	4.1e-05	0.001015	3.4e-05	0.02625	0.00089	1.46706	5.5e-05	-15.8787	1.45243	0.282335	-14.3599	1.45243	70.6576	1.41315	11.6	973.75
SK15_73_6	0.281785	2.5e-05	0.001757	2.3e-05	0.04812	0.00089	1.46711	3.6e-05	-35.3669	0.887359	0.281726	2.23595	0.887359	1759	35.18	13.11	1781.32
SK15_73_7	0.282257	3.5e-05	0.002087	5.7e-05	0.05097	0.00094	1.46707	5.3e-05	-18.6728	1.24022	0.282254	-17.1487	1.24022	73.34	1.4668	8.52	1894.89
SK15_73_8	0.282776	3.4e-05	0.001085	3e-05	0.0294	0.0013	1.4671	5.3e-05	-0.316422	1.20258	0.282774	1.74115	1.20258	95.7451	1.9149	11.23	1088.75
SK15_73_10	0.282305	3e-05	0.001155	3.8e-05	0.03083	0.0008	1.46707	4.4e-05	-16.9751	1.06287	0.282303	-15.4165	1.06287	72.829	1.45658	10	1142.32
SK15_73_11	0.281798	2.6e-05	0.00055	1.1e-05	0.01474	0.00014	1.46713	4.9e-05	-34.9071	0.92281	0.281781	1.84122	0.92281	1657.9	33.158	14.07	546.071
SK15_73_12	0.282868	2.7e-05	0.000803	5.5e-05	0.0185	0.0013	1.46711	4.2e-05	2.93751	0.954678	0.282866	6.53912	0.954678	165.963	3.31926	9.75	689.393
SK15_73_13	0.282925	3.7e-05	0.0005091	5.9e-06	0.01188	0.00025	1.46711	4.6e-05	4.95353	1.308	0.282924	8.1296	1.308	145.06	2.90119	8.72	442.468
SK15_73_14	0.282244	2.6e-05	0.001206	1.7e-05	0.0342	0.00078	1.46713	4.4e-05	-19.1326	0.921352	0.282242	-17.5484	0.921352	74.1559	1.48312	10.81	1264.5
SK15_73_15	0.282426	3.8e-05	0.001439	2.1e-05	0.03654	0.00078	1.4671	6.1e-05	-12.6955	1.34572	0.282424	-10.8614	1.34572	86.4069	1.72814	10.92	1356.39
SK15_73_17	0.282767	3.7e-05	0.001078	2.3e-05	0.0264	0.001	1.46708	5.2e-05	-0.634742	1.30873	0.282765	1.52089	1.30873	100.285	2.0057	9.36	981.357
SK15_73_18	0.282963	2.7e-05	0.000914	4.1e-05	0.0229	0.0011	1.46711	3.9e-05	6.29755	0.954357	0.282962	7.99718	0.954357	78.6374	1.57275	9.96	850.5
SK15_73_20	0.282337	2.8e-05	0.00318	0.00043	0.081	0.011	1.4671	4.9e-05	-15.8433	0.991898	0.282333	-14.3868	0.991898	72.5877	1.45175	18.08	3006.43
SK15_75_1	0.282432	2.2e-05	0.00079	3.1e-05	0.01843	0.00086	1.46713	4.8e-05	-12.4833	0.779086	0.282431	-10.845	0.779086	75.6596	1.51319	10.7	686.429
SK15_75_2	0.282142	3e-05	0.000874	2.6e-05	0.02189	0.00081	1.46711	4.3e-05	-22.7403	1.06348	0.282141	-21.154	1.06348	73.5272	1.47054	10.48	813
SK15_75_3	0.28268	3.4e-05	0.00116	4e-05	0.02532	0.00062	1.46711	4.6e-05	-3.71183	1.20299	0.282678	-1.96193	1.20299	81.6587	1.63317	11.59	945.714
SK15_75_4	0.281789	3.5e-05	0.000945	2.2e-05	0.02494	0.00068	1.4671	4.9e-05	-35.2254	1.24228	0.281758	2.31173	1.24228	1713	34.26	12.3	924.464
SK15_75_5	0.28222	4e-05	0.0005338	5.9e-06	0.011772	8e-05	1.46711	5.1e-05	-19.9815	1.41759	0.282205	11.9426	1.41759	1441	28.82	10.83	439.493
SK15_75_6	0.282465	3e-05	0.0005756	6.1e-06	0.01421	0.00019	1.4671	4.7e-05	-11.3161	1.06227	0.282464	-9.44668	1.06227	85.7549	1.7151	13.59	528.057
SK15_75_7	0.28239	3.2e-05	0.001294	3.6e-05	0.03036	0.00086	1.46706	5.9e-05	-13.9688	1.13339	0.282388	-12.0166	1.13339	91.5636	1.83127	9.79	1130.5
SK15_75_8	0.282008	3.2e-05	0.001931	2.2e-05	0.05232	0.00045	1.46709	5e-05	-27.4797	1.13492	0.281958	1.38422	1.13492	1362.8	27.256	13.49	1937.54
SK15_75_9	0.282933	3.6e-05	0.000656	1.4e-05	0.01418	0.00017	1.46705	4.9e-05	5.23648	1.27261	0.282932	7.73327	1.27261	114.58	2.29161	8.34	529.857
SK15_75_10	0.28193	3.3e-05	0.0005343	4.2e-06	0.01409	0.00018	1.46709	5.8e-05	-30.2384	1.17071	0.281912	9.14929	1.17071	1772.9	35.458	11.12	522.296
SK15_75_11	0.281585	4e-05	0.000738	1.2e-05	0.02112	0.00023	1.46705	5.9e-05	-42.4407	1.42078	0.281559	-2.27108	1.42078	1820.6	36.412	9.32	780.643
SK15_75_12	0.28229	3e-05	0.000688	2.1e-05	0.01724	0.00042	1.46716	4.5e-05	-17.5057	1.06293	0.282289	-15.9272	1.06293	72.711	1.45422	10.08	640.286
SK15_75_13	0.283023	2.7e-05	0.000635	2.2e-05	0.01597	0.00076	1.46712	4.7e-05	8.41967	0.954155	0.283022	11.2996	0.954155	132.008	2.64016	11.83	593.036
SK15_75_14	0.283083	3.6e-05	0.002181	6e-05	0.0564	0.0019	1.46714	5.9e-05	10.5418	1.27194	0.283079	12.6205	1.27194	99.9797	1.99959	11.95	2092.18
SK15_75_15	0.281961	3.2e-05	0.00192	0.00019	0.0493	0.0052	1.4671	4.9e-05	-29.142	1.13511	0.281899	6.78418	1.13511	1689.5	33.79	12.07	1829.29
SK15_75_17	0.282907	3.6e-05	0.000462	1.1e-05	0.00967	0.00025	1.46711	5.4e-05	4.31689	1.27273	0.282906	6.83349	1.27273	114.824	2.29648	16.9	361.857
SK15_75_18	0.283076	3.4e-05	0.000538	2.4e-05	0.01306	0.00058	1.46712	4.6e-05	10.2942	1.2013	0.283075	12.2866	1.2013	91.084	1.82168	13.97	485.643
SK15_75_19	0.282003	2.4e-05	0.00085	1.4e-05	0.02039	0.00025	1.46708	3.9e-05	-27.6565	0.851206	0.281979	5.23948	0.851206	1499.4	29.988	14.68	758.571
SK15_75_20	0.283045	3.5e-05	0.000737	1.7e-05	0.01878	0.00057	1.4671	4.8e-05	9.19779	1.23677	0.283043	12.5043	1.23677	151.985	3.03969	9.04	697.036
SK16_01_1	0.281911	2.3e-05	0.001148	3.7e-05	0.0303	0.0012	1.46712	4.2e-05	-30.9104	0.816005	0.281873	6.70485	0.816005	1726.3	34.526	12.74	1123.14
SK16_01_2	0.283015	2.5e-05	0.000639	1.3e-05	0.01564	0.00024	1.4671	4.4e-05	8.13672	0.883501	0.283014	10.6537	0.883501	115.411	2.30822	10.42	581.393
SK16_01_3	0.282906	2e-05	0.000893	3e-05	0.02115	0.00058	1.46712	5.1e-05	4.28152	0.707074	0.282903	7.80145	0.707074	162.629	3.25257	10.24	787.25
SK16_01_4	0.282388	2.7e-05	0.002053	5.7e-05	0.0529	0.0015	1.46712	3.6e-05	-14.0395	0.956301	0.282384	-12.0936	0.956301	93.4672	1.86934	11.63	1962.61
SK16_01_5	0.282958	2.9e-05	0.000605	2.3e-05	0.01328	0.00047	1.46711	4.1e-05	6.1207	1.02507	0.282956	9.53955	1.02507	156.562	3.13125	10.93	495.893
SK16_01_6	0.28204	2.7e-05	0.00241	0.00012	0.068	0.0031	1.46706	3.6e-05	-26.3479	0.957481	0.281977	2.23849	0.957481	1370.2	27.404	12.54	2514.64
SK16_01_7	0.282861	2.8e-05	0.000855	1.2e-05	0.01872	0.00033	1.46713	3.9e-05	2.68993	0.990061	0.282859	6.1646	0.990061	160.382	3.20765	10.82	699.107
SK16_01_8	0.282943	2.3e-05	0.000706	2e-05	0.01797	0.00049	1.46714	3.4e-05	5.59017	0.813028	0.282942	7.49987	0.813028	87.7954	1.75591	10.47	667
SK16_01_9	0.28246	4e-05	0.001176	3e-05	0.02846	0.00074	1.4671	4e-05	-11.493	1.41638	0.282458	-9.0959	1.41638	111.965	2.2393	9.11	1058.43
SK16_01_10	0.282061	3.4e-05	0.001575	1.4e-05	0.04873	0.00067	1.46712	3.8e-05	-25.6051	1.20563	0.282019	4.32365	1.20563	1396.5	27.93	9.8	1796.61
SK16_01_11	0.282408	3.8e-05	0.001	2.6e-05	0.02529	0.00044	1.4671	5.3e-05	-13.3321	1.34581	0.282406	-11.3966	1.34581	89.9575	1.79915	6.54	938.929
SK16_01_13	0.282728	3.6e-05	0.0015	5e-05	0.042	0.0017	1.46706	3.9e-05	-2.01413	1.27353	0.282726	-0.33477	1.27353	79.1852	1.5837	7.83	1553.57
SK16_01_14	0.281789	3.5e-05	0.0008856	7.3e-06	0.02434	0.00014	1.46714	3.8e-05	-35.2254	1.24228	0.28176	2.71172	1.24228	1727.8	34.556	10.22	900.914
SK16_01_15	0.282835	3.3e-05	0.000892	1.5e-05	0.02179	0.00046	1.46707	4.1e-05	1.77034	1.16696	0.282834	3.49552	1.16696	79.8018	1.59604	8.76	810.071
SK16_01_16	0.283002	2.8e-05	0.0009232	5.9e-06	0.01983	0.00026	1.46712	4e-05	7.67693	0.989567	0.282999	10.9816	0.989567	152.79	3.05581	8.06	741.186
SK16_01_17	0.282972	3.5e-05	0.001241	4.4e-05	0.0308	0.0011	1.46708	5.1e-05	6.61587	1.23709	0.28297	8.52484	1.23709	89.2011	1.78402	8	1144.32
SK16_01_18	0.283016	2.5e-05	0.000622	1.8e-05	0.01589	0.0006	1.46713	3.7e-05	8.17209	0.883498	0.283015	10.7322	0.883498	117.326	2.34653	12.04	589.714
SK16_01_19	0.282865	2e-05	0.0005245	5e-06	0.01321	0.00016	1.46712	3e-05	2.8314	0.707176	0.282863	6.43588	0.707176	164.701	3.29402	10.53	490.518
SK16_01_20	0.282962	3.5e-05	0.0004435	6.7e-06	0.00925	0.00024	1.46708	4.5e-05	6.26218	1.23713	0.282961	8.89356	1.23713	119.963	2.39927	9.03	346.196
SK14_28_02	0.282776	3.9e-05	0.00077	4e-05	0.01656	0.00059	1.46718	5.8e-05	-0.3	1.4	0.282773	4	1.4	198	3.96	9.76	618.929
SK14_28_04	0.282939	3.6e-05	0.00056	1e-05	0.01353	0.0003	1.46715	4.5e-05	5.4	1.3	0.282938	7.8	1.3	108	2.16	7.3	503.214
SK14_28_05	0.28304	3.6e-05	0.00119	2e-05	0.02706	0.00044	1.46714	3.7e-05	9	1.3	0.283038	11.5	1.3	117	2.34	8.95	1008.93
SK14_28_06	0.283013	3.4e-05	0.00108	3e-05	0.02204	0.00076	1.46717	4.5e-05	8.1	1.2	0.28301	11.6	1.2	165	3.3	8.09	825.714
SK14_28_07	0.282928	3e-05	0.00045	5e-05	0.0102	0.0011	1.46713	4.6e-05	5.1	1.1	0.282928	6.6	1.1	69	1.38	8.6	380.357
SK14_28_08	0.282997	4.2e-05	0.00079	2e-05	0.01851	0.00042	1.46712	5e-05	7.5	1.5	0.282996	9.5	1.5	92	1.84	6.14	689.286
SK14_28_09	0.282951	4.3e-05	0.00082	1e-05	0.01877	0.00024	1.46709	5.8e-05	5.9	1.5	0.28295	8	1.5	98	1.96	5.96	699.643
SK14_28_10	0.282975	3.1e-05	0.00089	7e-05	0.0201	0.0012	1.46718	5.6e-05	6.7	1.1	0.282971	11.5	1.1	222	4.44	7.61	749.643
SK14_28_11	0.282956	4.2e-05	0.0005	3e-05	0.01301	0.0007	1.46714	4.8e-05	6.1	1.5	0.282955	8.7	1.5	123	2.46	8.02	482.5
SK14_28_14	0.282862	3.2e-05	0.00071	6e-05	0.014	0.0011	1.46714	3.7e-05	2.7	1.1	0.28286	6.1	1.1	155	3.1	11.13	525.357
SK14_28_15	0.282886	3.1e-05	0.00109	0	0.0264	0.00012	1.4671	5e-05	3.6	1.1	0.282883	6.4	1.1	133	2.66	7.46	981.786
SK14_28_16	0.282928	3.2e-05	0.00255	0.00031	0.0596	0.0074	1.46711	5.2e-05	5.1	1.1	0.282922	7.8	1.1	136	2.72	8.12	2219.64
SK14_28_17	0.282923	2.3e-05	0.00034	1e-05	0.00664	0.00014	1.46719	3.9e-05	4.9	0.8	0.282923	6.4	0.8	68	1.36	9.65	249.286
SK14_28_18	0.283055	3e-05	0.00101	4e-05	0.02598	0.00092	1.46714	3.9e-05	9.6	1.1	0.283053	11.7	1.1	102	2.04	8.58	963.929
SK14_28_19	0.282946	3.1e-05	0.00092	7e-05	0.0188	0.0016	1.46717	3.7e-05	5.7	1.1	0.282945	7.3	1.1	73	1.46	9.52	704.286
SK14_28_20	0.282918	2.7e-05	0.00165	3e-05	0.03441	0.00087	1.46713	4.6e-05	4.7	1	0.282914	7.8	1	147	2.94	7.43	1287.86
SK14_28_21	0.282446	3e-05	0.00082	1e-05	0.01811	0.00023	1.46718	4.4e-05	-12	1.1	0.282443	-7.9	1.1	189	3.78	10.52	676.071
SK14_28_22	0.282464	3.1e-05	0.0007	3e-05	0.01469	0.00045	1.46712	5.4e-05	-11.4	1.1	0.282463	-9.3	1.1	95	1.9	12.16	549.643
SK14_28_23	0.282881	2e-05	0.00115	2e-05	0.02251	0.00045	1.46712	3.9e-05	3.4	0.7	0.282878	6.9	0.7	165	3.3	10.46	845
SK14_28_24	0.282933	3.4e-05	0.0019	8e-05	0.0485	0.0019	1.46711	4e-05	5.2	1.2	0.282928	8	1.2	130	2.6	8.08	1800
SK14_28_25	0.28298	3.6e-05	0.00078	2e-05	0.01804	0.00054	1.46715	4e-05	6.9	1.3	0.282978	10.2	1.3	152	3.04	8.05	672.143
SK14_28_26	0.282665	3.3e-05	0.00066	3e-05	0.01515	0.00067	1.46716	4.5e-05	-4.2	1.2	0.282661	3.6	1.2	358	7.16	8.53	564.643
SK14_28_28	0.282869	4.1e-05	0.00094	8e-05	0.0226	0.0023	1.46714	5.2e-05	3	1.4	0.282867	5.2	1.4	103	2.06	7.32	840.714
SK14_28_29	0.283025	3.6e-05	0.00067	1e-05	0.01743	0.00011	1.46712	5.2e-05	8.5	1.3	0.283024	10.5	1.3	94	1.88	7.5	646.429
SK14_28_30	0.282992	3.1e-05	0.0008	1e-05	0.02084	0.00022	1.46713	4.7e-05	7.3	1.1	0.282991	9.4	1.1	95	1.9	7.61	772.857
SK14_28_31	0.283035	3.3e-05	0.00051	1e-05	0.0114	0.00013	1.46717	5e-05	8.8	1.2	0.283034	11.9	1.2	138	2.76	7.48	425.357
SK14_43B_02	0.282504	2.7e-05	0.001014	1.6e-05	0.02519	0.00066	1.46718	4.2e-05	-9.93669	0.955969	0.282502	-7.87075	0.955969	96.02	1.9204	16.43	935.857
SK14_43B_03	0.282944	3.8e-05	0.000495	1.2e-05	0.01088	0.0003	1.4672	4.3e-05	5.62658	1.34334	0.282942	10.0105	1.34334	200	4	7.77	406.25
SK14_43B_04	0.282726	3.9e-05	0.001404	5.6e-05	0.0354	0.0017	1.46721	5.1e-05	-2.08431	1.37976	0.282724	-0.376636	1.37976	80.28	1.6056	9.27	1314.43
SK14_43B_05	0.282087	2.7e-05	0.002342	8.4e-05	0.0722	0.0017	1.46717	3.9e-05	-24.6864	0.957382	0.282026	4.1588	0.957382	1379.2	27.584	12.56	2662.21
SK14_43B_06	0.281795	4.3e-05	0.0007585	7.9e-06	0.02109	0.00016	1.46716	3.9e-05	-35.0148	1.5263	0.281768	6.11406	1.5263	1862.9	37.258	7.42	780.304
SK14_43B_07	0.281802	4.2e-05	0.000898	7.7e-05	0.0236	0.0022	1.46718	5.9e-05	-34.7672	1.49077	0.281771	4.36731	1.49077	1781.8	35.636	9.2	874.929
SK14_43B_08	0.282963	3e-05	0.000478	1.3e-05	0.01035	0.00021	1.46718	4e-05	6.29863	1.06046	0.282962	8.57707	1.06046	104	2.08	12.06	386.714
SK14_43B_09	0.282061	4e-05	0.00115	5.5e-05	0.02888	0.00094	1.46717	3.8e-05	-25.6061	1.41847	0.282024	10.8208	1.41847	1672	33.44	9.46	1072.5
SK14_43B_10	0.28257	2.9e-05	0.00105	2e-05	0.02492	0.00079	1.46714	4.5e-05	-7.6022	1.02654	0.282568	-5.47413	1.02654	98.99	1.9798	10.71	927.5
SK14_43B_11	0.282041	3.2e-05	0.002261	6.1e-05	0.0613	0.0022	1.46714	4.5e-05	-26.3135	1.13486	0.28197	8.31772	1.13486	1646.7	32.934	8.62	2270.04
SK14_43B_12	0.282663	3.2e-05	0.000568	4.8e-06	0.01515	0.00021	1.46718	3.7e-05	-4.31269	1.13236	0.282662	-2.63487	1.13236	76.9	1.538	8.03	561.357
SK14_43B_13	0.28125	3.9e-05	0.000969	1.7e-05	0.02497	0.00042	1.46709	4.4e-05	-54.292	1.387	0.281217	-15.2524	1.387	1784.9	35.698	7.68	926.393
SK14_43B_14	0.282776	3.8e-05	0.001557	1.4e-05	0.03945	0.00064	1.46715	3.1e-05	-0.31576	1.34414	0.282765	7.39571	1.34414	363	7.26	8.81	1464.54
SK14_43B_16	0.281857	3.6e-05	0.001847	5.5e-06	0.04959	0.00021	1.46717	2.9e-05	-32.8218	1.27755	0.281797	3.48847	1.27755	1704	34.08	9.49	1837.04
SK14_43B_17	0.281889	4.1e-05	0.001362	1.5e-05	0.03781	0.00045	1.4672	4.6e-05	-31.6899	1.45482	0.281845	4.65175	1.45482	1680	33.6	8.39	1399
SK14_43B_18	0.282721	3.5e-05	0.000635	1.8e-05	0.01623	0.00053	1.46717	5.5e-05	-2.26117	1.23827	0.28272	-0.344419	1.23827	88	1.76	9.18	602.321
SK14_43B_19	0.282503	4.1e-05	0.000993	2.8e-05	0.02406	0.00073	1.4672	3.8e-05	-9.97206	1.45166	0.282501	-7.90738	1.45166	95.9	1.918	7.18	894.75
SK14_43B_20	0.28221	2.8e-05	0.004276	7.8e-05	0.1182	0.0033	1.46718	3.4e-05	-20.3358	0.992408	0.282204	-18.8414	0.992408	77.3	1.546	12.6	4374.14
SK14_43B_21	0.281576	4e-05	2.54e-05	1.3e-06	0.000882	3.3e-05	1.46715	4.4e-05	-42.761	1.42092	0.281575	-4.51133	1.42092	1699.1	33.982	11.88	32.4071
SK14_43B_23	0.283074	3.9e-05	0.000848	2e-05	0.02151	0.00042	1.46717	4.1e-05	10.2248	1.37806	0.283073	11.9408	1.37806	79.2	1.584	7.55	798.5
SK14_43B_24	0.282103	3.1e-05	0.001125	2.7e-05	0.03008	0.00043	1.46717	4e-05	-24.1205	1.09915	0.282073	6.5329	1.09915	1410	28.2	8.38	1114.46
SK14_43B_25	0.282511	3.9e-05	0.0003949	6.6e-06	0.00928	0.00019	1.46723	4.2e-05	-9.68909	1.38081	0.28251	-7.81689	1.38081	85.4	1.708	8.21	345.532
SK14_43B_26	0.282959	3.6e-05	0.000842	4e-05	0.02239	0.00097	1.46722	4.2e-05	6.15715	1.27257	0.282957	9.48278	1.27257	153.4	3.068	9	829.714
SK14_43B_27	0.282964	3.9e-05	0.00193	0.00017	0.0456	0.0039	1.46717	4.5e-05	6.334	1.3786	0.282958	9.84543	1.3786	167.5	3.35	8.64	1697.5
SK14_43B_28	0.281692	4e-05	0.000468	1.4e-05	0.01179	0.00035	1.46718	3.1e-05	-38.658	1.42033	0.281677	-0.545282	1.42033	1714.7	34.294	11.46	437.786
SK14_43B_29	0.281632	3.5e-05	0.0004972	3.8e-06	0.01351	0.00023	1.46721	3.6e-05	-40.7803	1.24306	0.281615	-1.50165	1.24306	1768	35.36	9.04	500.257
SK14_43B_30	0.283013	3.5e-05	0.001004	2.9e-05	0.0231	0.00072	1.46719	3.7e-05	8.06718	1.23699	0.28301	11.4073	1.23699	154.8	3.096	9.92	860.857
SK14_43B_35	0.28297	2.2e-05	0.000787	5.3e-05	0.0179	0.0013	1.46718	3.5e-05	6.54623	0.777654	0.282967	11.0596	0.777654	207.7	4.154	8.1	667.393
SK14_43B_36	0.282073	3e-05	0.001421	2.3e-05	0.03814	0.00069	1.46717	3.9e-05	-25.1816	1.06381	0.282036	4.59737	1.06381	1383	27.66	10.73	1412.89
SK14_43B_37	0.281778	3.6e-05	0.0008712	4.1e-06	0.02456	0.00025	1.4672	3.6e-05	-35.6161	1.27791	0.281749	2.40802	1.27791	1731	34.62	8.25	908.257
SK14_43B_38	0.282935	3.3e-05	0.000853	4.9e-05	0.0207	0.001	1.46713	3.3e-05	5.30824	1.16663	0.282932	9.54903	1.16663	195.6	3.912	8.71	769.75
SK14_43B_39	0.282548	2.4e-05	0.00205	0.00021	0.0523	0.0056	1.46714	3.4e-05	-8.38036	0.849618	0.282544	-6.2574	0.849618	101.89	2.0378	11.37	1941.07
SK14_43B_40	0.282407	2.7e-05	0.000722	4.8e-05	0.0205	0.0016	1.46715	2.7e-05	-13.3677	0.956297	0.2824	-2.75131	0.956297	487	9.74	12.03	757.929
SK14_43B_41	0.283	2.5e-05	0.0008519	7.8e-06	0.02178	0.00033	1.4672	4.2e-05	7.60736	0.883605	0.282999	9.74328	0.883605	98.6	1.972	10.68	808.282
SK14_43B_42	0.283093	2.9e-05	0.000571	1.7e-05	0.01516	0.00062	1.46719	3.4e-05	10.8969	1.02464	0.283092	12.9643	1.02464	94.6	1.892	12.54	561.821
SK14_40C_01	0.28263	2.2e-05	0.000656	1.7e-05	0.01365	0.00032	1.4672	3.3e-05	-5.47994	0.77859	0.282629	-3.77635	0.77859	78.2977	1.56595	12.7	510.929
SK14_40C_02	0.28225	2.6e-05	0.000277	1.5e-05	0.00711	0.00036	1.46717	3.4e-05	-18.9209	0.921391	0.282249	-16.7188	0.921391	100.168	2.00337	11.53	263.821
SK14_40C_03	0.281566	3.1e-05	0.000708	1.8e-05	0.01869	0.00051	1.46718	4.4e-05	-43.1148	1.10125	0.281541	-2.46916	1.10125	1840.19	36.8038	8.82	692.786
SK14_40C_04	0.282312	2.1e-05	0.001571	2e-05	0.04013	0.00051	1.46721	3.8e-05	-16.7279	0.744037	0.282271	12.6979	0.744037	1371.97	27.4394	13.41	1489.32
SK14_40C_05	0.281183	2.1e-05	0.000469	2.1e-05	0.0118	0.00048	1.46718	4.3e-05	-56.6619	0.747025	0.281161	-2.65628	0.747025	2414.39	48.2879	10.28	438.179
SK14_40C_06	0.282012	2.5e-05	0.00227	2.9e-05	0.0598	0.0011	1.46721	4.1e-05	-27.3393	0.886701	0.281953	1.57383	0.886701	1379.65	27.5929	12.25	2216.79
SK14_40C_07	0.281967	3.8e-05	0.001647	2.2e-05	0.03708	0.00045	1.46718	4.4e-05	-28.931	1.348	0.281913	8.08253	1.348	1724.96	34.4992	7.27	1383.11
SK14_40C_08	0.281981	2.7e-05	0.000686	1.9e-05	0.01652	0.00053	1.4672	4e-05	-28.4358	0.957742	0.281958	9.8176	0.957742	1730.34	34.6068	9.8	614.5
SK14_40C_09	0.282505	3.3e-05	0.000906	1.3e-05	0.02466	0.00056	1.4672	4.2e-05	-9.90132	1.1684	0.282503	-7.56337	1.1684	108.288	2.16575	14.33	913.071
SK14_40C_10	0.282567	2.4e-05	0.000936	2.2e-05	0.02223	0.00062	1.46722	3.5e-05	-7.70831	0.849561	0.282565	-5.72566	0.849561	91.9121	1.83824	9.82	827.357
SK14_40C_11	0.28234	3.4e-05	0.00166	1.9e-05	0.03938	0.00026	1.46721	3.2e-05	-15.7375	1.20451	0.282337	-13.9306	1.20451	85.7446	1.71489	13.77	1465.71
SK14_40C_12	0.281825	2.6e-05	0.000932	1.2e-05	0.02434	0.00028	1.46721	3.5e-05	-33.9536	0.922781	0.281795	3.6564	0.922781	1715.37	34.3073	9.98	902.571
SK14_40C_13	0.28257	2.6e-05	0.001403	3.1e-05	0.03699	0.00092	1.4672	4.6e-05	-7.6022	0.920347	0.282553	6.0957	0.920347	640.143	12.8029	9.47	1371.18
SK14_40C_14	0.281921	4e-05	0.000942	7.4e-05	0.0262	0.0018	1.46717	5.4e-05	-30.558	1.41918	0.281891	6.67584	1.41918	1698.47	33.9694	13.12	969.357
SK14_40C_15	0.281831	2.9e-05	0.001726	4.4e-05	0.046	0.0015	1.46717	4.1e-05	-33.7414	1.02923	0.281774	3.39596	1.02923	1735.7	34.7141	12.98	1704.5
SK14_40C_16	0.282049	2.9e-05	0.00155	0.00012	0.0415	0.0039	1.46719	3.4e-05	-26.0305	1.02844	0.281998	11.1718	1.02844	1727.91	34.5583	10.06	1537.5
SK14_40C_17	0.28203	2e-05	0.002329	5.1e-05	0.065	0.0012	1.46718	3.8e-05	-26.7026	0.709315	0.281968	2.6104	0.709315	1400.93	28.0186	12.28	2404.61
SK14_40C_18	0.282819	2.6e-05	0.0007934	9.4e-06	0.01903	0.00027	1.46723	4.1e-05	1.2052	0.919537	0.282818	3.15004	0.919537	89.6874	1.79375	11.78	707.979
SK14_40C_19	0.282016	2.7e-05	0.00111	0.00015	0.0287	0.0039	1.46716	3.3e-05	-27.1978	0.957623	0.281986	3.55854	0.957623	1414.46	28.2891	15.3	1064.64
SK14_40C_20	0.282802	2.5e-05	0.001123	3.5e-05	0.0288	0.0012	1.46719	3.5e-05	0.603888	0.884223	0.282801	2.20363	0.884223	74.5391	1.49078	10.79	1068.68
SK14_40C_21	0.282651	2.8e-05	0.000735	3.3e-05	0.0177	0.001	1.46719	4.7e-05	-4.73714	0.990859	0.28265	-2.93516	0.990859	83.0087	1.66017	9.18	658.393
SK14_40C_22	0.282551	3.8e-05	0.001377	4.6e-05	0.0312	0.0014	1.46712	5.6e-05	-8.27425	1.34521	0.282549	-6.8283	1.34521	67.9723	1.35945	14.8	1163.46
SK14_40C_23	0.282536	2.6e-05	0.001967	1.1e-05	0.03913	0.00026	1.46718	3.6e-05	-8.80482	0.920458	0.282532	-6.46831	0.920458	111.836	2.23673	9.9	1467.75
SK14_40C_24	0.282035	2.8e-05	0.002183	5.2e-05	0.0611	0.0011	1.4672	3.4e-05	-26.5257	0.993024	0.281979	2.09939	0.993024	1362.27	27.2454	12.78	2260.11
SK14_40C_25	0.282659	2.9e-05	0.001331	8.5e-05	0.0344	0.0023	1.4672	3.8e-05	-4.45417	1.02622	0.282657	-2.3051	1.02622	100.803	2.01606	10.88	1276.11
SK14_40C_26	0.282441	5.3e-05	0.0004424	5.8e-06	0.01228	0.0002	1.46712	9.3e-05	-12.1651	1.87695	0.28244	-10.209	1.87695	89.3695	1.78739	15.61	454.371
SK14_40C_27	0.282382	3.9e-05	0.00189	0.0001	0.0524	0.0029	1.46717	3.9e-05	-14.252	1.38144	0.282379	-12.5178	1.38144	82.8814	1.65763	9.01	1938.93
SK14_40C_28	0.281978	3.2e-05	0.001759	3.9e-05	0.0504	0.0016	1.46721	3.8e-05	-28.5419	1.13511	0.281932	0.526628	1.13511	1365.14	27.3028	10.15	1862.82
SK14_40C_29	0.282375	2.9e-05	0.000637	4e-05	0.0181	0.0014	1.46718	4e-05	-14.4996	1.02725	0.282367	0.182706	1.02725	670.424	13.4085	8.74	669.179
SK14_40C_30	0.28275	2.2e-05	0.000484	1.7e-05	0.01213	0.00052	1.46719	4.4e-05	-1.23541	0.77826	0.282749	0.44573	0.77826	76.8327	1.53665	9.8	450.5
SK14_40C_31	0.282456	2.6e-05	0.000977	4e-05	0.02797	0.00096	1.46715	4.7e-05	-11.6345	0.920719	0.282447	-0.952177	0.920719	493.734	9.87469	10.04	1033.82
SK14_40C_32	0.282774	3e-05	0.001389	2.9e-05	0.03669	0.00098	1.46715	4.5e-05	-0.386502	1.06117	0.282772	1.27461	1.06117	78.0429	1.56086	8.37	1359.96
SK14_40C_33	0.281988	3.1e-05	0.002674	4.6e-05	0.0748	0.0021	1.46714	4.1e-05	-28.1882	1.0996	0.281918	0.293152	1.0996	1377.02	27.5404	11.67	2766.93
SK14_40C_34	0.28268	3e-05	0.001141	2.6e-05	0.0286	0.0012	1.46721	3.8e-05	-3.71138	1.06153	0.282678	-1.99842	1.06153	79.8896	1.59779	8.23	1062.18
SK14_40C_35	0.282953	3.9e-05	0.001168	1.6e-05	0.03015	0.0004	1.46715	5.4e-05	5.94492	1.37865	0.28295	9.06386	1.37865	145.328	2.90655	7.72	1118.5
SK14_40C_36	0.281932	3.4e-05	0.001828	6e-05	0.051	0.0018	1.46719	4.5e-05	-30.1689	1.20626	0.281875	4.77818	1.20626	1639.81	32.7963	9.96	1886.71
SK14_40C_37	0.283049	3.4e-05	0.0005586	7.5e-06	0.01441	0.00027	1.46717	3.7e-05	9.34054	1.20149	0.283048	12.0656	1.20149	124.622	2.49243	8.41	534.593
SK14_40C_38	0.281721	3.5e-05	0.000652	8.4e-06	0.01832	0.00041	1.46715	4.7e-05	-37.6322	1.24266	0.281699	2.14268	1.24266	1797.58	35.9517	8.09	677.571
SK14_40C_39	0.28181	3.1e-05	0.000456	1.5e-05	0.0124	0.00034	1.46715	3.8e-05	-34.4842	1.1003	0.281795	3.27435	1.1003	1697.76	33.9553	8.8	459.143
SK14_40C_40	0.282169	4.2e-05	0.000486	4.3e-05	0.0136	0.0017	1.46716	5.3e-05	-21.786	1.48883	0.282156	8.99208	1.48883	1388.37	27.7674	14.05	503.071
SK14_40C_42	0.282132	3.6e-05	0.001299	6.7e-05	0.0372	0.0024	1.46718	4.4e-05	-23.0947	1.27631	0.282098	6.79269	1.27631	1382.49	27.6497	11.22	1374.96
																	0
SK14_32_01	0.281864	2.9e-05	0.0006139	2.7e-06	0.015619	9.7e-05	1.46719	4.3e-05	-32.5758	1.02919	0.281844	4.59939	1.02919	1679.59	33.5918	12.31	579.746
SK14_32_02	0.282164	4.4e-05	0.001015	1.5e-05	0.02316	0.00053	1.46718	4.1e-05	-21.9637	1.55987	0.282136	9.31424	1.55987	1433.15	28.663	12.7	863.393
SK14_32_03	0.282948	4.5e-05	0.0006151	8.6e-06	0.01343	0.00024	1.4672	8.5e-05	5.76929	1.5909	0.282946	9.11347	1.5909	153.201	3.06402	12.61	501.611
SK14_32_04	0.28297	4.8e-05	0.002712	7.6e-05	0.0496	0.0013	1.46718	5.2e-05	6.54751	1.69683	0.282967	8.01134	1.69683	71.671	1.43342	12.6	1868.29
SK14_32_05	0.283029	5e-05	0.00196	0.00014	0.0456	0.0044	1.46721	4.5e-05	8.63456	1.76716	0.283025	10.9772	1.76716	111.9	2.238	8.79	1698.57
SK14_32_06	0.282834	4.7e-05	0.001577	2.8e-05	0.03584	0.0005	1.46715	7.7e-05	1.73669	1.66228	0.28283	4.95932	1.66228	152.131	3.04262	9.82	1336.32
SK14_32_07	0.282981	3.2e-05	0.001464	3.2e-05	0.03041	0.00069	1.46725	4.5e-05	6.93662	1.13117	0.282977	10.4391	1.13117	164.648	3.29296	7.69	1138.36
SK14_32_08	0.28293	4.4e-05	0.001176	7.9e-05	0.0223	0.0016	1.46725	4.1e-05	5.13256	1.55564	0.282928	6.91218	1.55564	83.0087	1.66017	11.8	838.429
SK14_32_09	0.283034	5e-05	0.00295	0.00023	0.0756	0.0063	1.46716	6.1e-05	8.81143	1.76713	0.283021	13.6518	1.76713	238.312	4.76624	7.23	2805.36
SK14_32_10	0.282249	3.8e-05	0.002748	1.3e-05	0.07196	0.00043	1.46718	5.5e-05	-18.9569	1.34675	0.282177	9.58568	1.34675	1381.83	27.6366	11.2	2668.14
SK14_32_11	0.28231	2.9e-05	0.000555	1.2e-05	0.01366	0.00021	1.46723	4e-05	-16.7991	1.02756	0.282309	-14.7078	1.02756	95.9146	1.91829	8.74	507.679
SK14_32_12	0.281868	3.6e-05	0.000782	1.1e-05	0.01939	0.00035	1.46722	4.4e-05	-32.4343	1.2776	0.281842	5.55492	1.2776	1724.27	34.4853	7.44	720.429
SK14_32_13	0.282848	5.1e-05	0.000507	1.1e-05	0.01121	0.00034	1.46721	4.5e-05	2.23192	1.80366	0.282847	4.24127	1.80366	91.8485	1.83697	9.3	418.464
SK14_32_14	0.282949	4e-05	0.0006934	5.5e-06	0.01667	0.00013	1.4672	6e-05	5.80466	1.41413	0.282947	8.90317	1.41413	142.302	2.84603	6.07	620.121
SK14_32_15	0.282913	4.1e-05	0.00056	2.3e-05	0.01253	0.00056	1.46724	5.6e-05	4.53121	1.44966	0.282912	6.63369	1.44966	96.2321	1.92464	8.83	467.5
SK14_32_17	0.283066	5.2e-05	0.001283	1.1e-05	0.03219	0.00025	1.46725	5.4e-05	9.94339	1.83761	0.283063	12.5832	1.83761	123.42	2.4684	5.84	1195.46
SK14_32_18	0.282925	3.6e-05	0.000747	3.8e-05	0.01593	0.00077	1.46729	4.6e-05	4.95569	1.27282	0.282923	8.42601	1.27282	159.619	3.19238	7.08	595.607
SK14_32_19	0.283042	3.5e-05	0.00203	0.00011	0.0502	0.003	1.46718	4.2e-05	9.09442	1.23695	0.283036	12.3649	1.23695	156.474	3.12948	8.14	1865.36
SK14_32_20	0.28302	4.1e-05	0.000844	1.2e-05	0.02124	0.00022	1.46722	4.5e-05	8.3162	1.44912	0.283019	10.4483	1.44912	98.3911	1.96782	7.36	788.714
SK14_32_21	0.282921	3.6e-05	0.001009	2.8e-05	0.02189	0.00064	1.46726	6.3e-05	4.8142	1.27284	0.28292	6.54251	1.27284	80.208	1.60416	6.95	817.821
SK14_32_22	0.28309	4.7e-05	0.001405	3.5e-05	0.02949	0.00098	1.46715	6.2e-05	10.7924	1.66077	0.283087	13.4251	1.66077	123.547	2.47093	5.65	1103.39
SK14_32_24	0.282463	4.1e-05	0.000803	4.3e-05	0.0231	0.0012	1.46716	3.6e-05	-11.387	1.45198	0.28246	-7.70053	1.45198	170.113	3.40225	9.6	853.679
SK14_32_25	0.282938	3.6e-05	0.000747	1.6e-05	0.01647	0.00048	1.46721	4.4e-05	5.41555	1.27276	0.282935	10.1632	1.27276	218.214	4.36429	6.6	614.893
SK14_32_26	0.283055	4e-05	0.0017582	8.4e-06	0.04414	0.00062	1.46722	5.3e-05	9.55428	1.4136	0.283052	11.4463	1.4136	89.8145	1.79629	6.74	1639.22
SK14_32_28	0.281869	3.6e-05	0.001107	2.1e-05	0.02891	0.00052	1.46719	4.8e-05	-32.3989	1.27759	0.281835	2.77086	1.27759	1614.38	32.2876	9.98	1072.04
SK14_32_29	0.28216	2.7e-05	0.00172	1.1e-05	0.03114	0.00029	1.46718	3.7e-05	-22.1052	0.957206	0.282118	5.52149	0.957206	1296	25.92	13.32	1173.57
SK14_32_30	0.282817	4.9e-05	0.00146	0.00012	0.0359	0.0034	1.46724	4.9e-05	1.13534	1.73311	0.282808	8.61865	1.73311	351.192	7.02384	6.85	1334.29
SK14_32_31	0.282996	3.6e-05	0.000554	2.3e-05	0.01324	0.00065	1.46725	3.9e-05	7.46723	1.2725	0.282995	10.1437	1.2725	122.408	2.44816	7.56	492.643
SK14_32_32	0.281215	4.2e-05	0.000977	2.7e-05	0.02549	0.00074	1.46721	4.7e-05	-55.5333	1.49399	0.281159	9.94505	1.49399	2954	59.08	9.06	945.25
SK14_32_34	0.282958	3.3e-05	0.000763	1.3e-05	0.01797	0.00031	1.46722	3.9e-05	6.12303	1.16662	0.282957	8.06236	1.16662	89.3059	1.78612	13.13	669.036
SK14_32_35	0.282136	3.5e-05	0.001771	8.5e-05	0.046	0.0024	1.46716	4e-05	-22.9542	1.24093	0.282089	6.75952	1.24093	1394.66	27.8933	9.74	1706.11
SK14_32_36	0.282788	2.8e-05	0.000889	2e-05	0.02232	0.00061	1.46723	4.5e-05	0.109498	0.990453	0.282786	2.85956	0.990453	127.15	2.543	8.28	828.893
SK14_32_37	0.283	4.3e-05	0.001588	6e-05	0.0366	0.0017	1.46725	6e-05	7.60872	1.51991	0.282995	11.5297	1.51991	184.976	3.69951	5.84	1363.86
SK14_32_38	0.283058	3.4e-05	0.001207	4.2e-05	0.03043	0.00089	1.46722	3.3e-05	9.6604	1.20155	0.283056	11.825	1.20155	100.994	2.01987	9.61	1129.89
SK14_32_39	0.282447	4.1e-05	0.002011	3.1e-05	0.05248	0.00067	1.46723	4.6e-05	-11.9529	1.45206	0.282395	17.0591	1.45206	1370.87	27.4174	12.09	1946.11
SK14_32_41	0.282458	2.6e-05	0.0012194	7.2e-06	0.02598	0.00075	1.46719	3.2e-05	-11.5638	0.920781	0.282456	-9.62501	0.920781	90.7045	1.81409	9.57	971.407
SK14_32_42	0.283044	3.8e-05	0.000759	3.3e-05	0.02027	0.00079	1.46723	5.7e-05	9.16517	1.34297	0.283043	10.9781	1.34297	83.4542	1.66908	8.27	751.036
SK14_32_43	0.283094	2.9e-05	0.001326	8.2e-05	0.0328	0.002	1.46724	3.4e-05	10.9339	1.02472	0.283092	12.9143	1.02472	92.7382	1.85476	10.42	1218.79
aHf isotope ratios were corrected for instrumental mass bias using 179Hf/177Hf = 0.7935. 176Hf/177Hf ratios were normalized relative to 176Hf/177Hf = 0.282482 for Plesovice (Slama et al., 2008; Fisher et al., 2014) and 176Hf/177Hf = 0.282160 for JMC-475 (Vervoort and Blichert-Toft, 1999). MunZirc-2 and MunZirc-4, a Yb-rich synthetic zircon (Fisher et al., 2011), were analyzed to assess the accura…
bUncertainties on Hf/Hf, Lu/Hf, and Yb/Hf isotope ratios are 2s standard error based on the population of measurements within an analysis.
cThe εHf values were calculated using CHUR values of 176Hf/177Hf = 0.282785 and 176Lu/177Hf = 0.0336 (Bouvier et al., 2008).
dThe initial 176Hf/177Hf and εHf values were calculated using the 176Lu decay constant (1.867*10-11) of Söderlund et al. (2004).
eAssigned age is based on the LA-ICP-MS U-Pb analysis of the same grain.
fTotal volts of Hf isotope signal during analysis.
gCorrection (in εHf units) applied to the 176Hf/177Hf ratio due to interference of 176Lu and 176Yb.
